# Supplementary material
Source: PubMed Central journal article supplement (PMC8278331)
Supplement: NIHMS1711270-supplement-SM2.pdf [file NIHMS1711270-supplement-SM2.pdf]

# CPT/RTT Percent Change Maps

The times denote seconds after task onset, task offset occurred at time 32.

0s

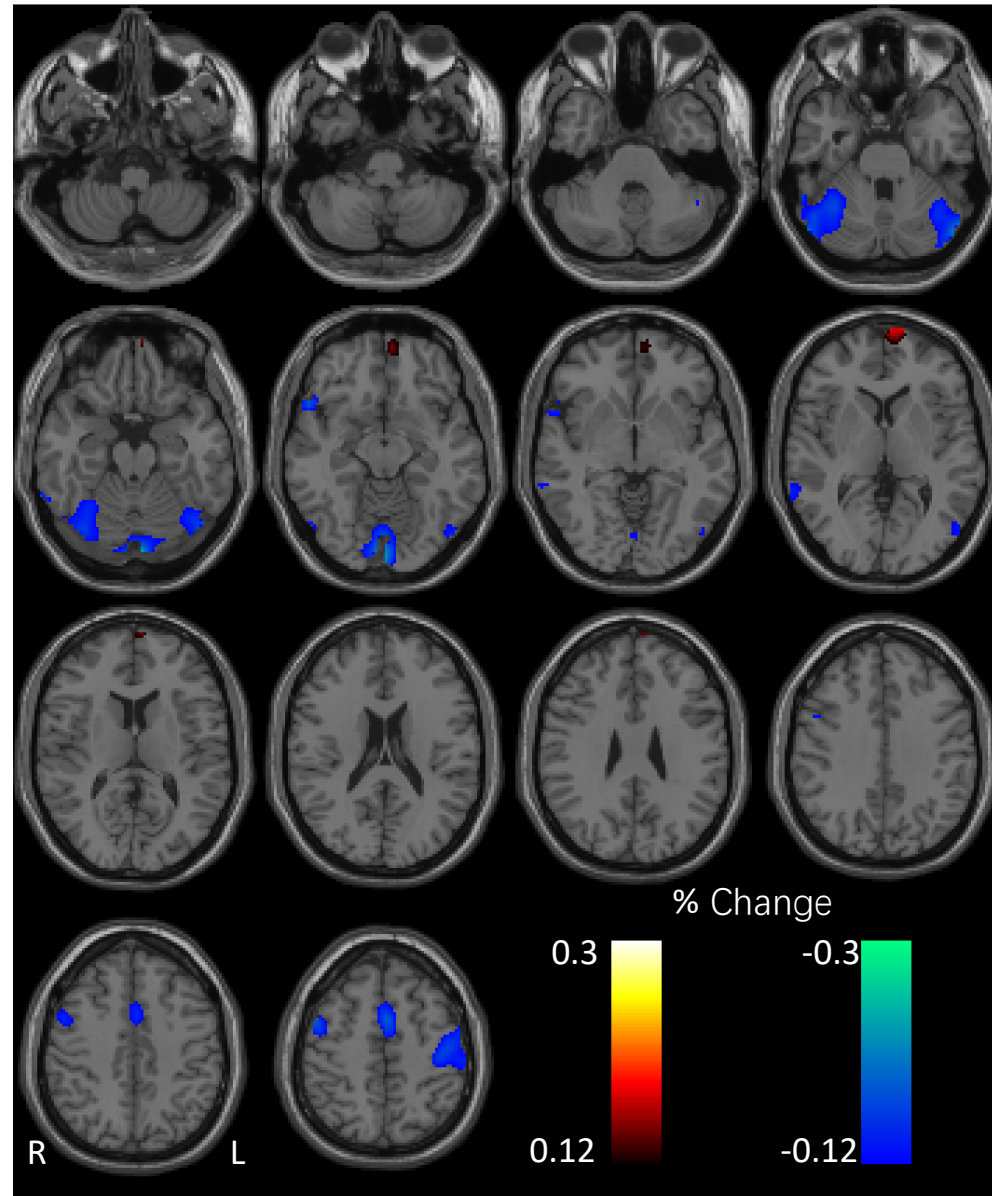

Rong Li et al.,  
2021 *Neuroimage*

1s

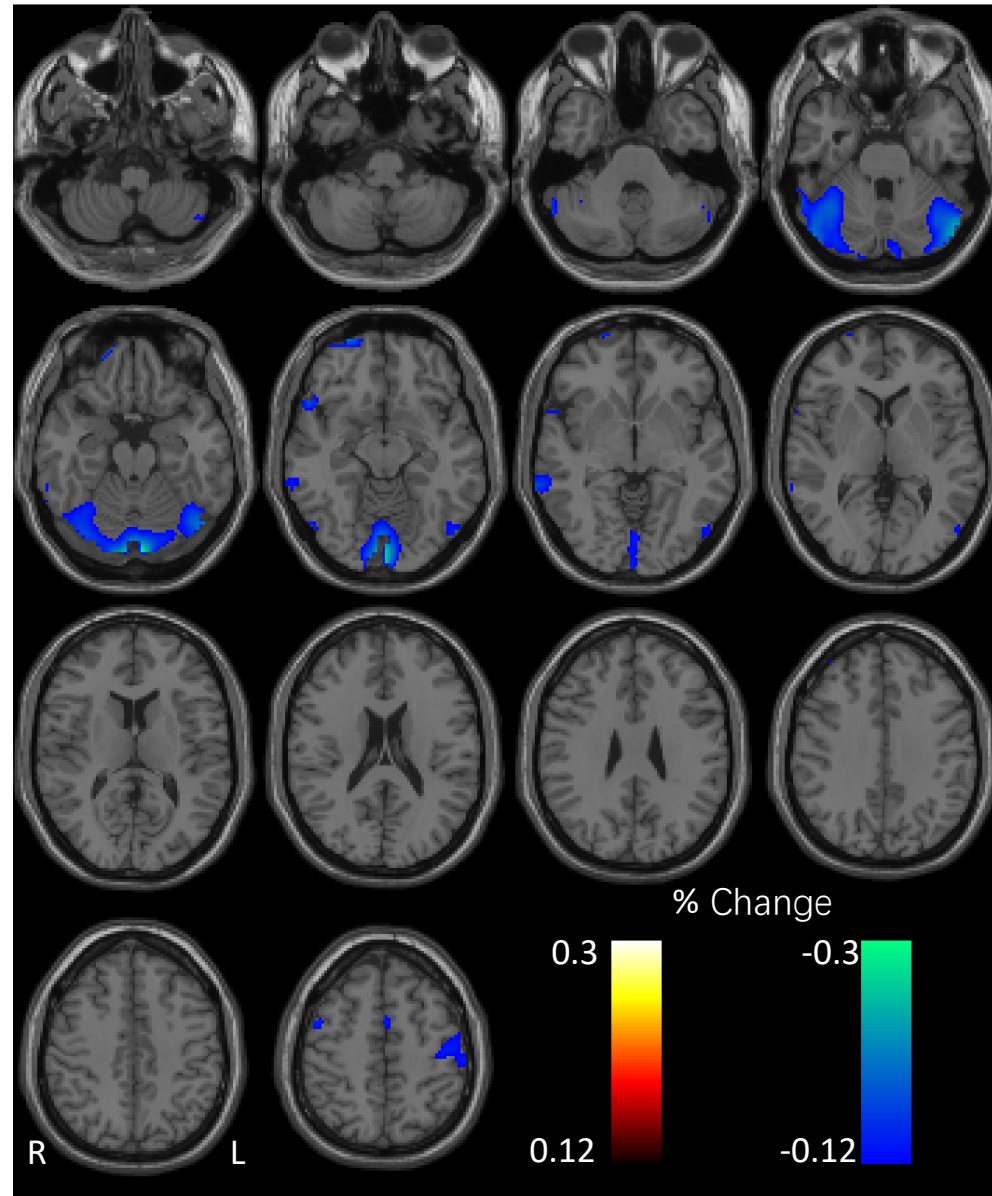

Rong Li et al.,  
2021 *Neuroimage*

2s

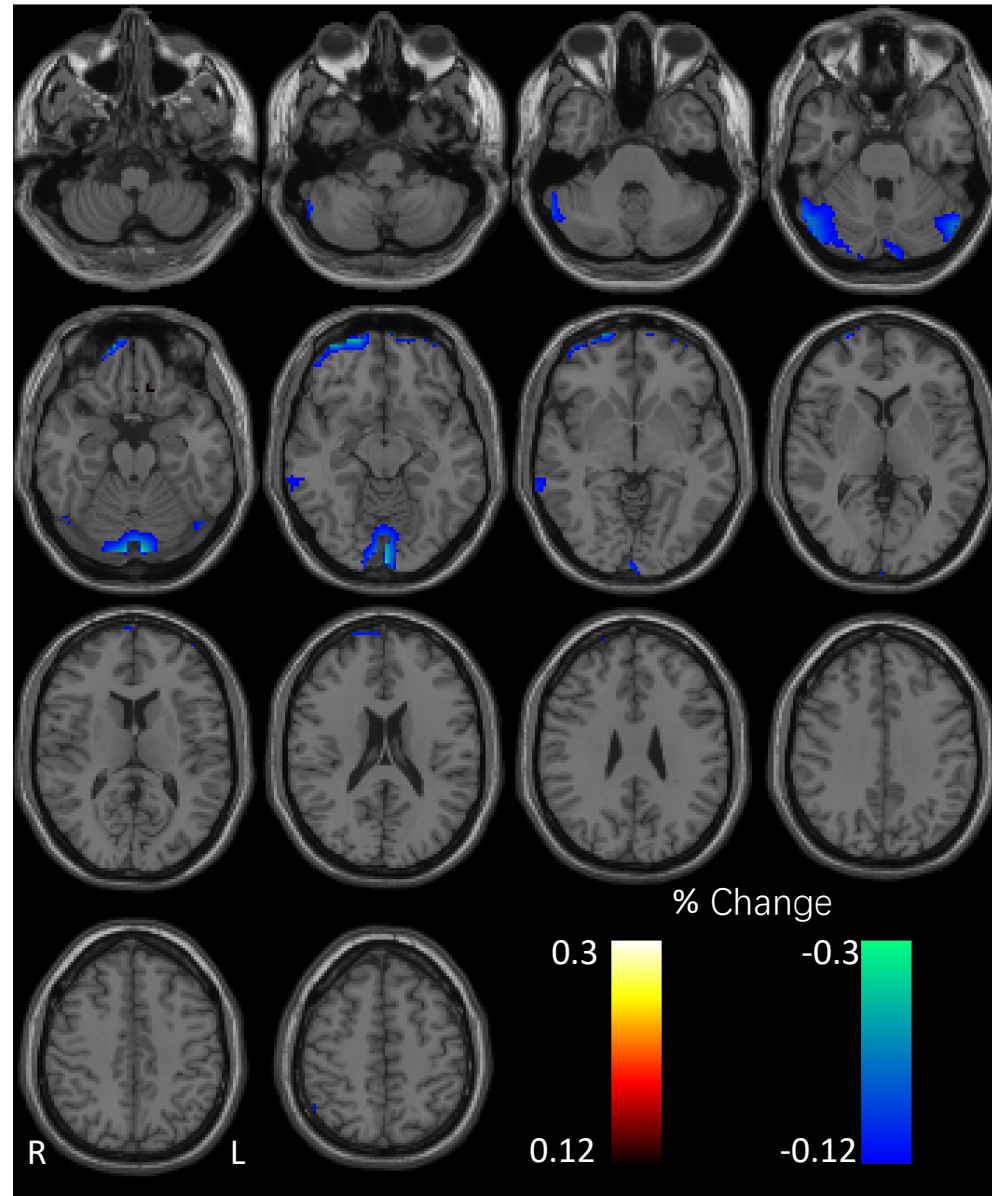

Rong Li et al.,  
2021 *Neuroimage*



3s

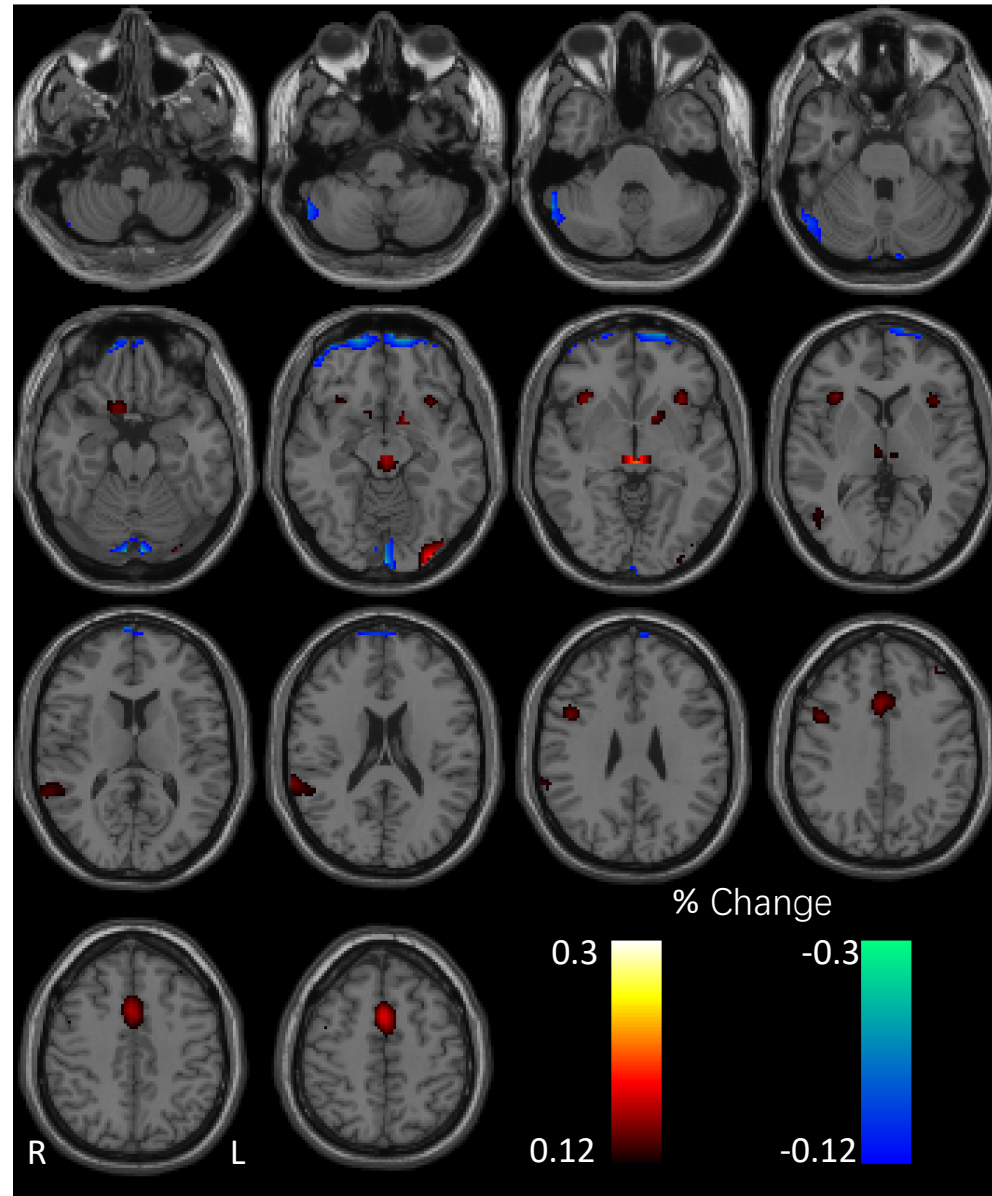

Rong Li et al.,  
2021 *Neuroimage*

4s

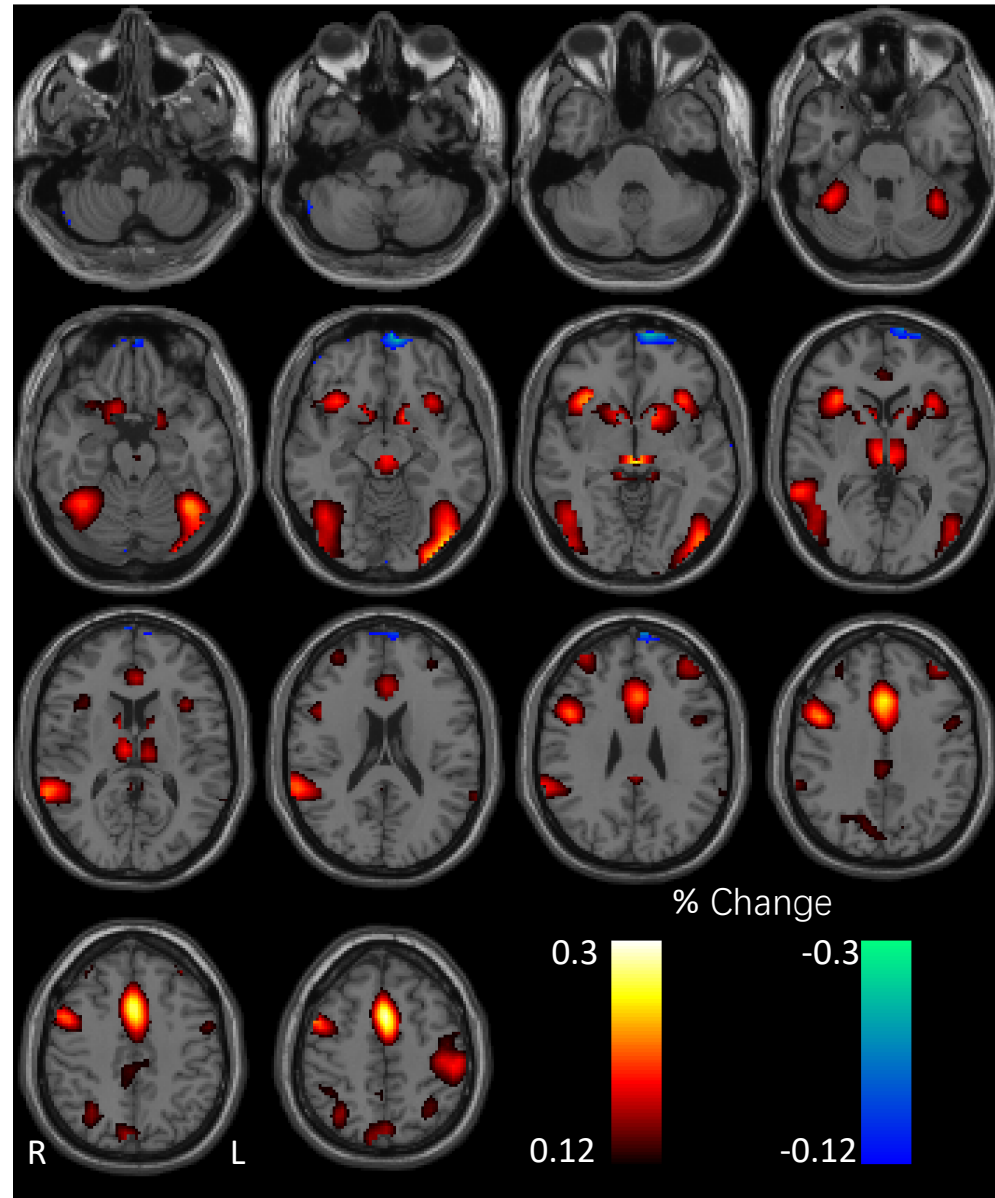

Rong Li et al.,  
2021 *Neuroimage*

5s

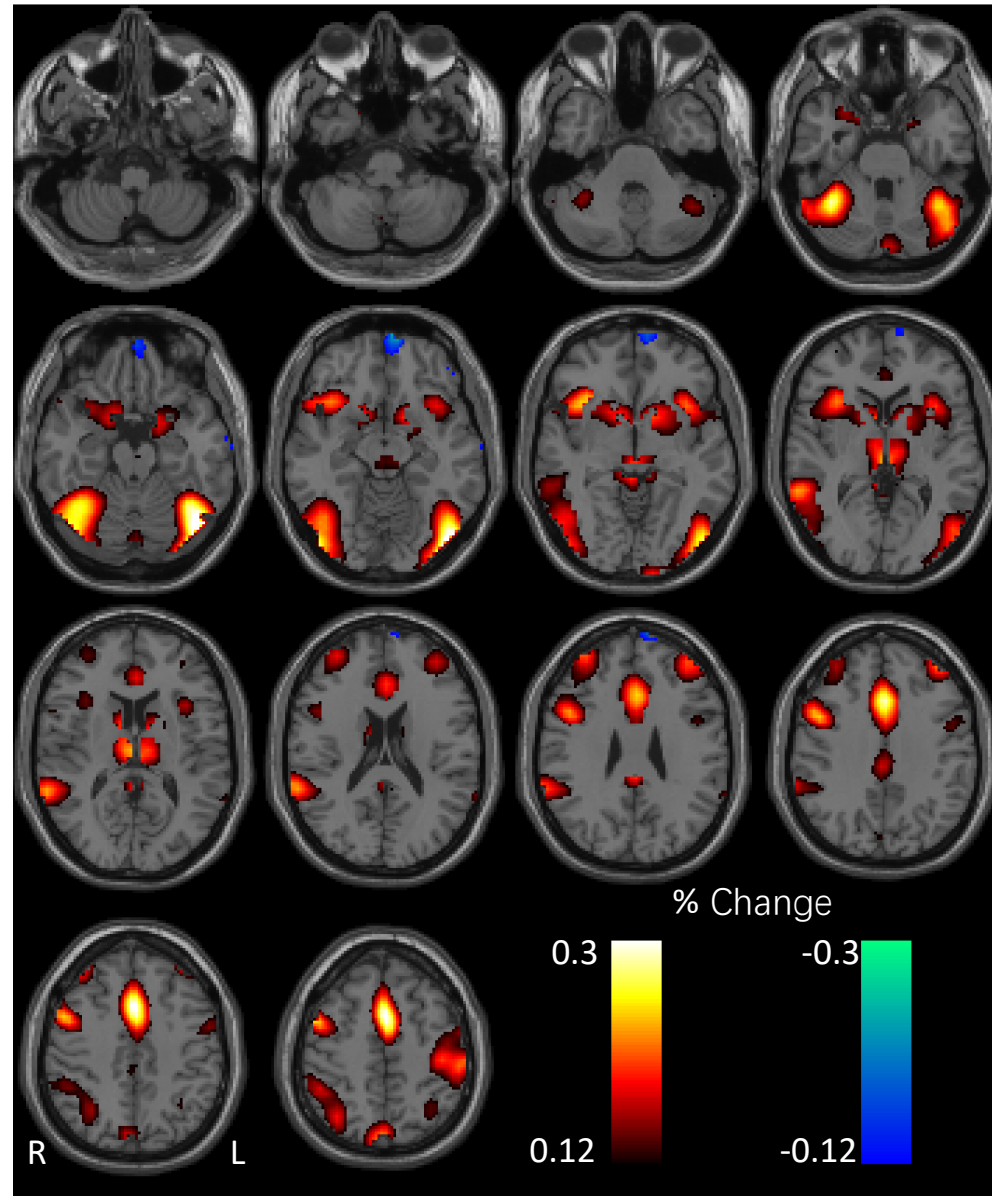

Rong Li et al.,  
2021 *Neuroimage*

6s

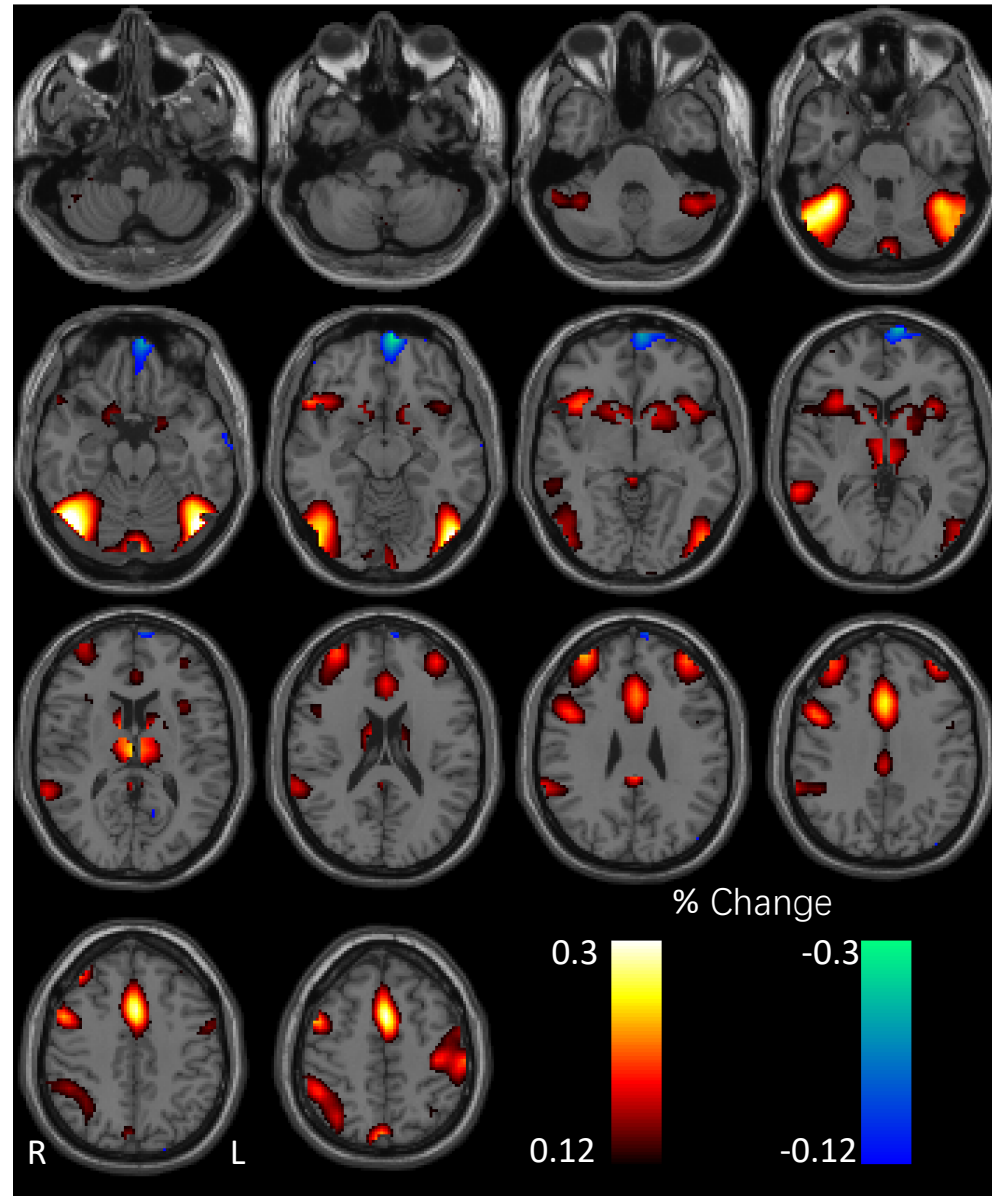

Rong Li et al.,  
2021 *Neuroimage*

7s

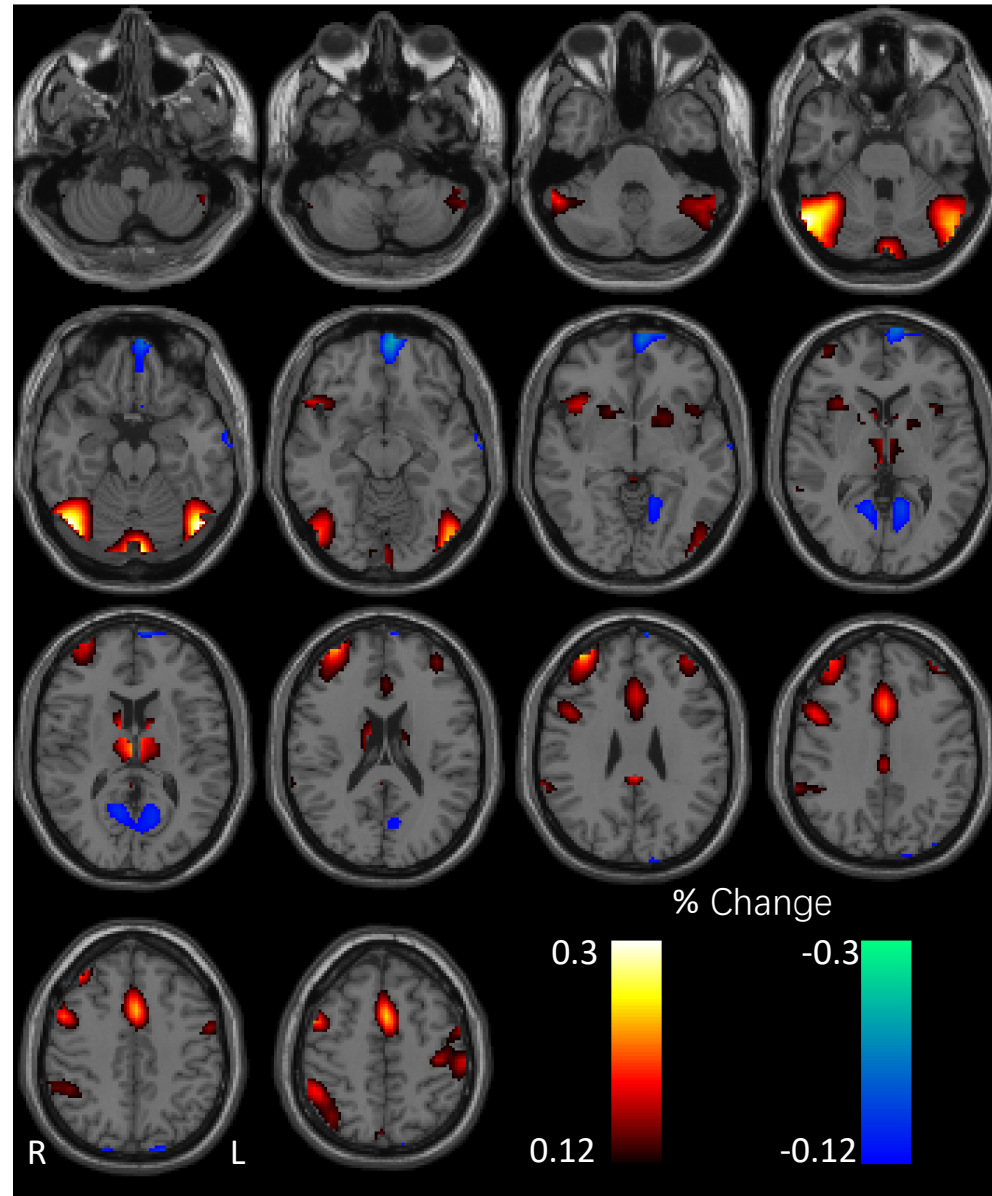

Rong Li et al.,  
2021 *Neuroimage*

8s

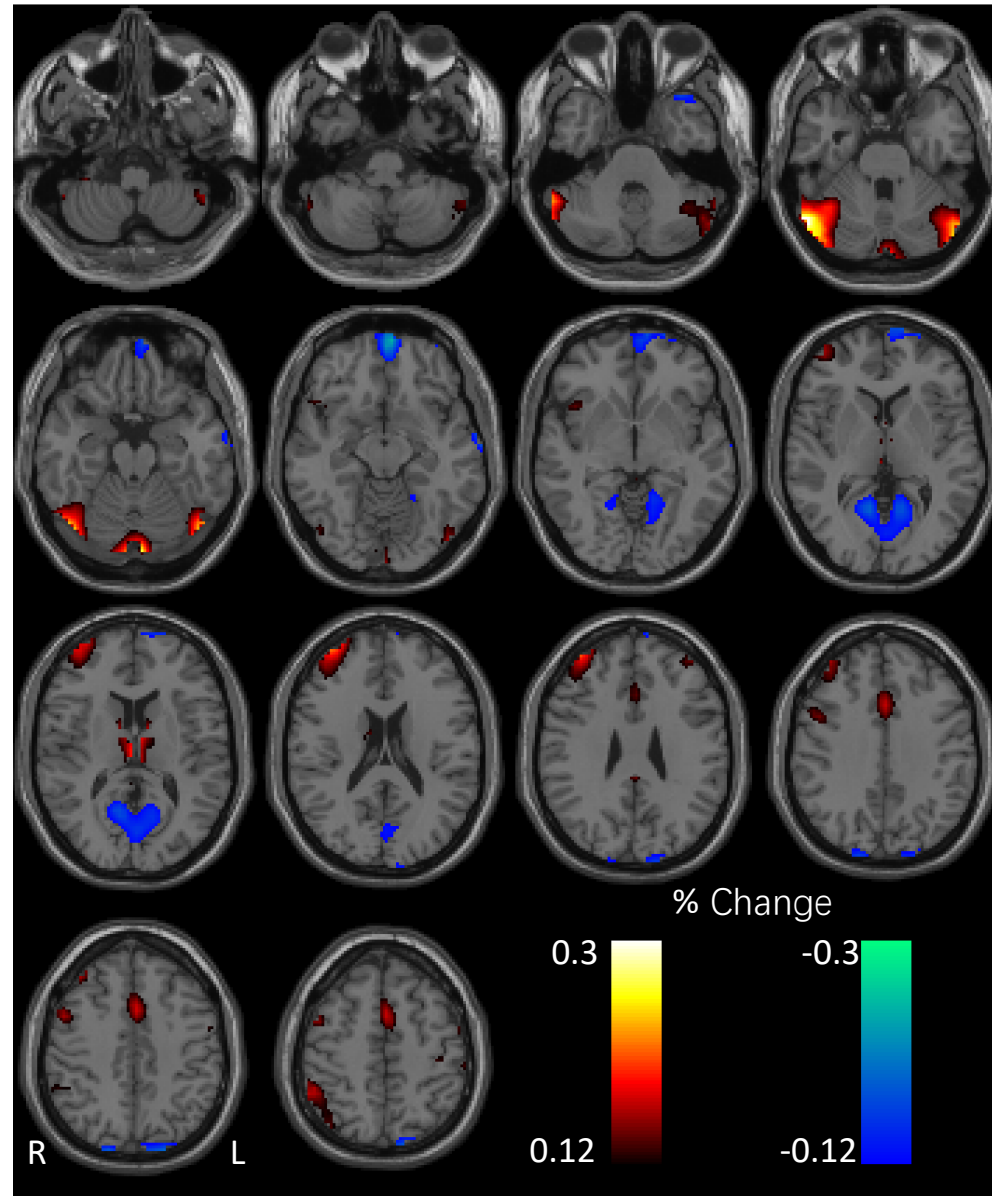

Rong Li et al.,  
2021 *Neuroimage*

9s

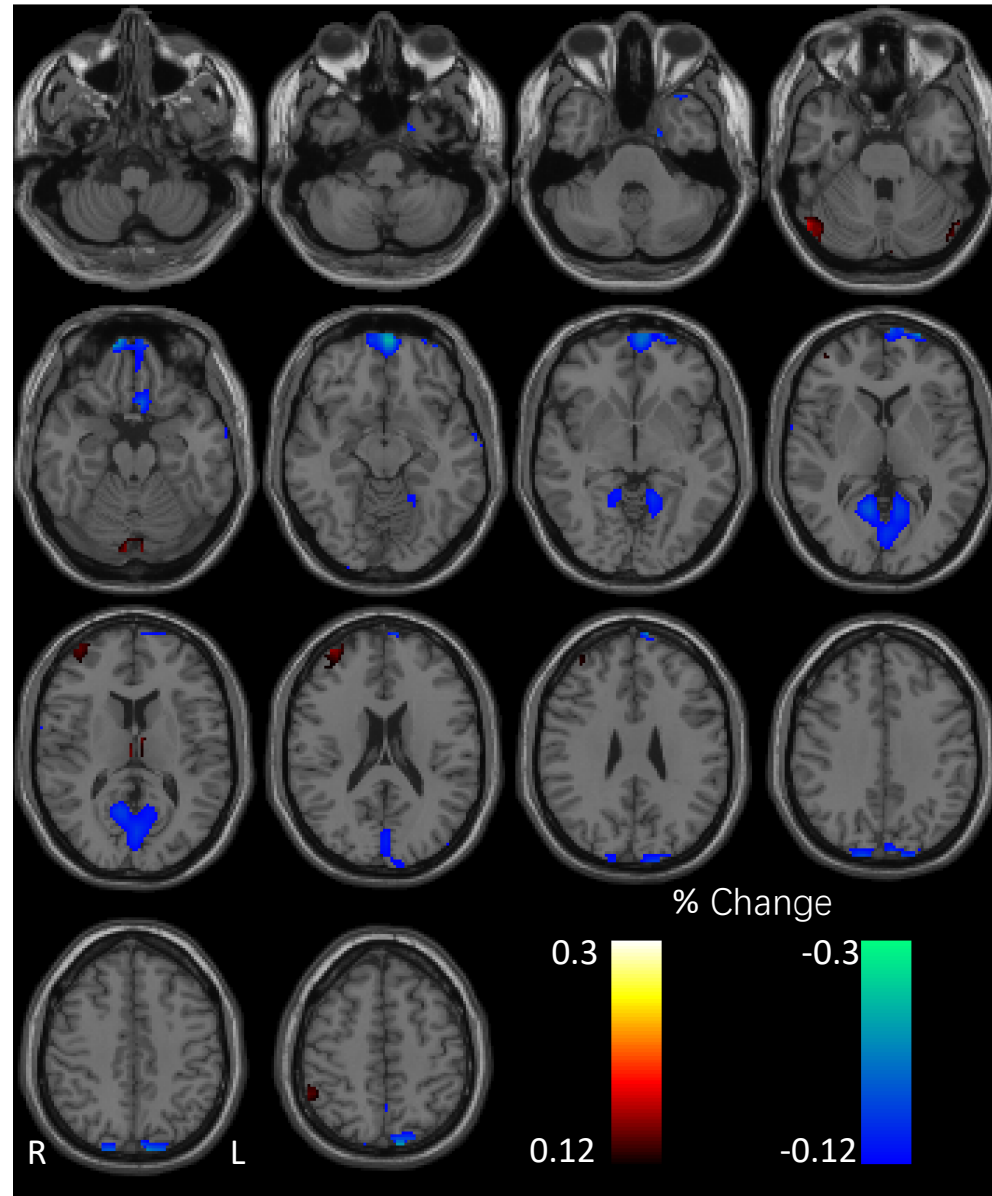

Rong Li et al.,  
2021 *Neuroimage*



10s

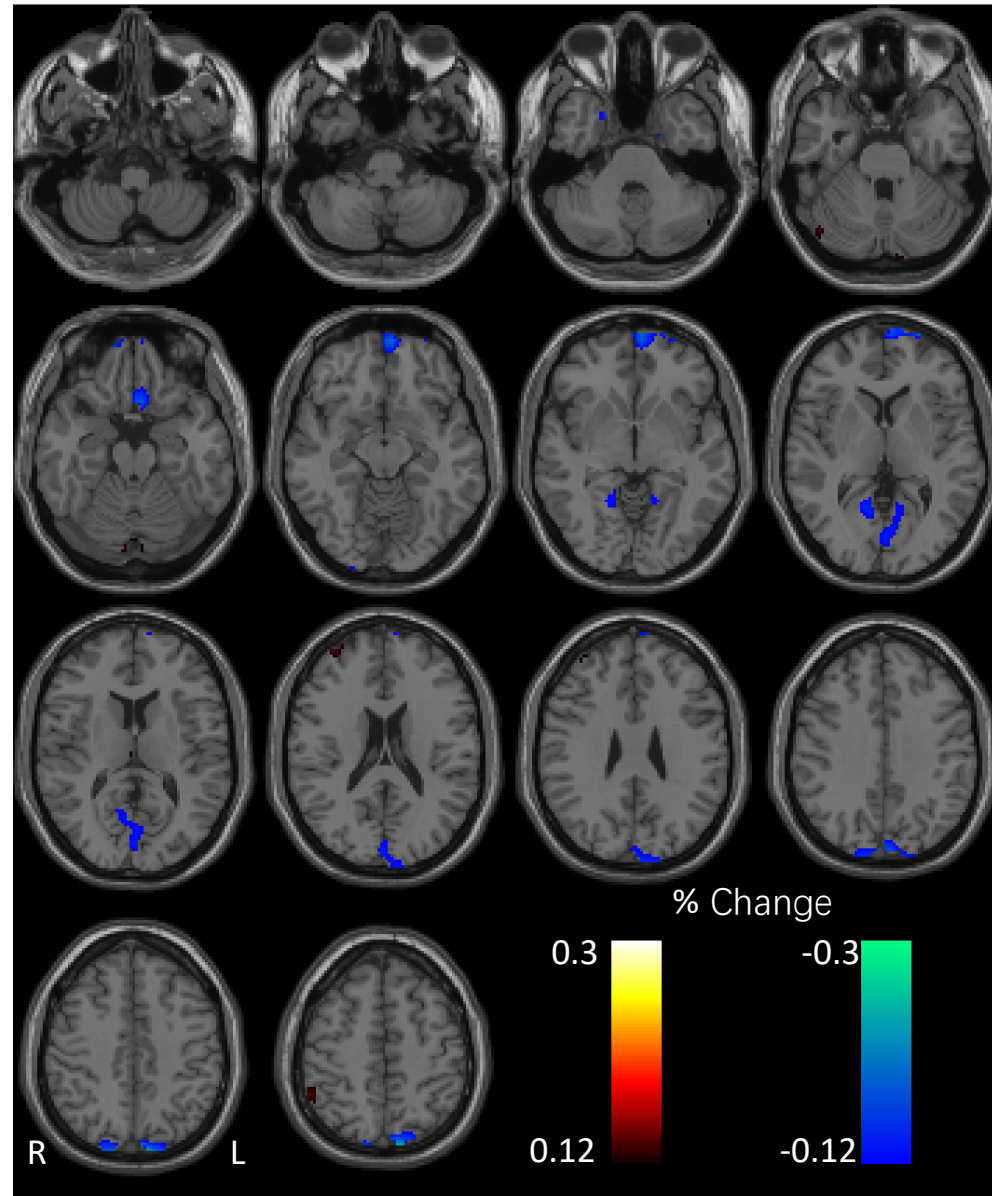

Rong Li et al.,  
2021 *Neuroimage*



11s

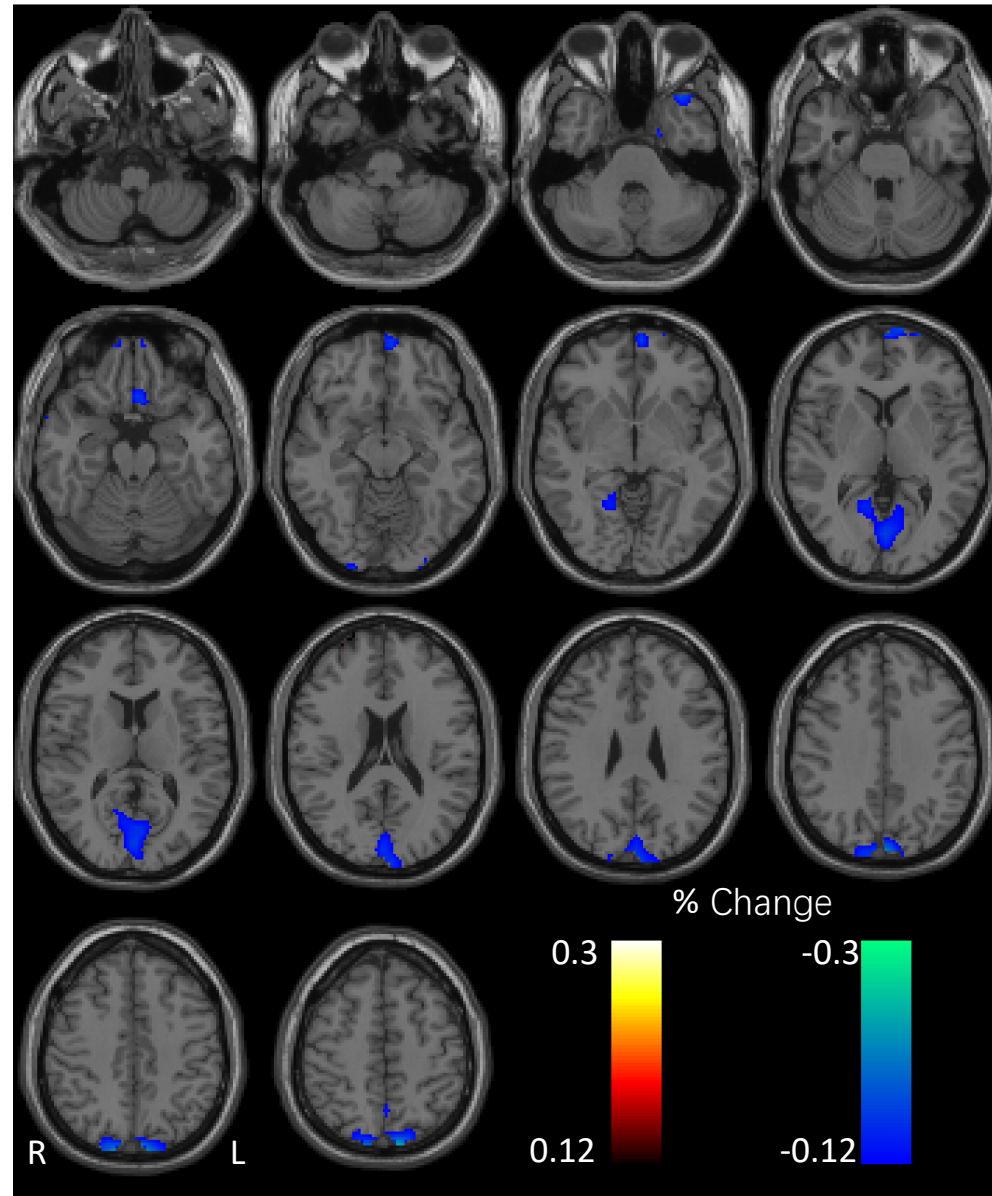

Rong Li et al.,  
2021 *Neuroimage*

12s

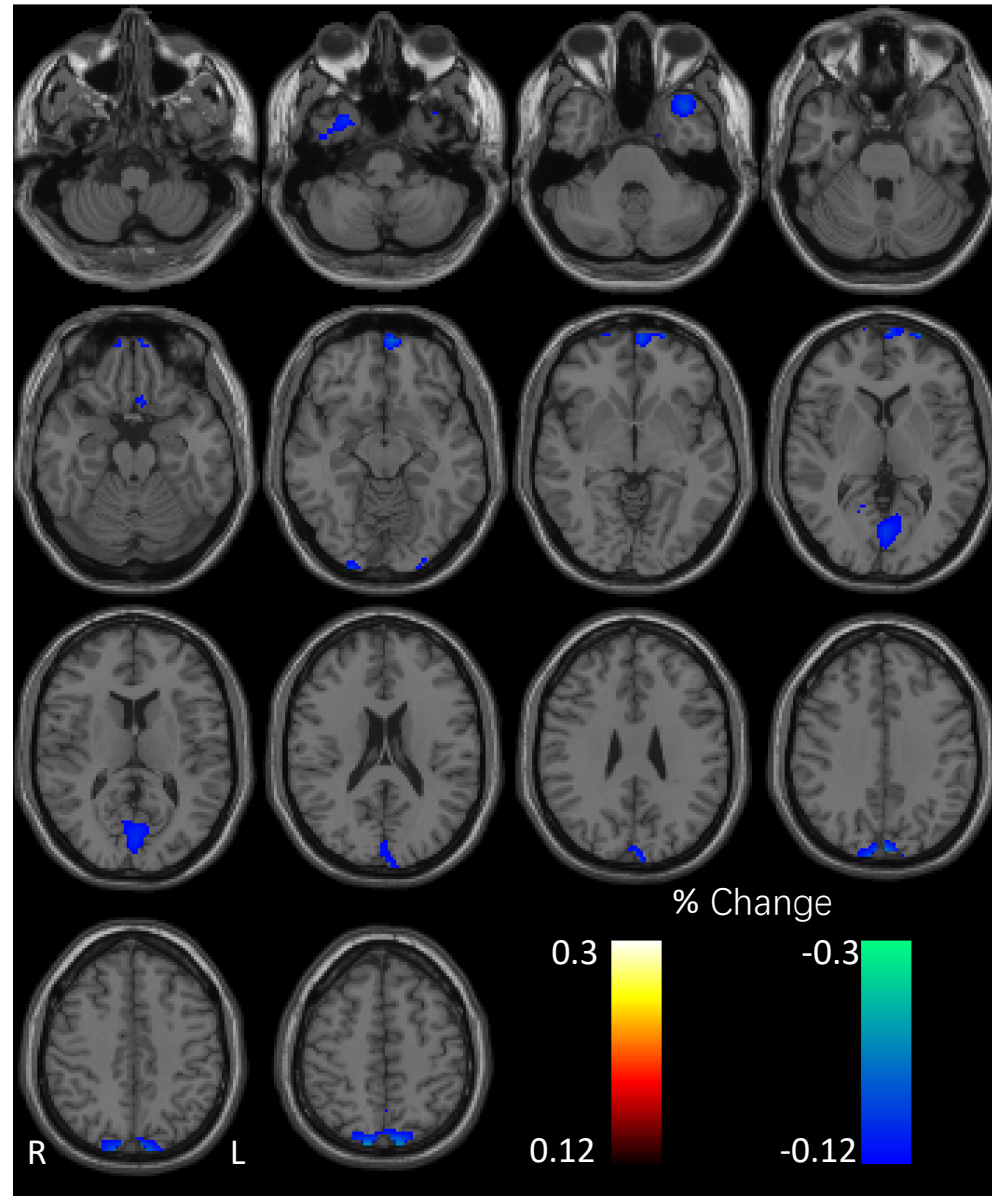

Rong Li et al.,  
2021 *Neuroimage*

13s

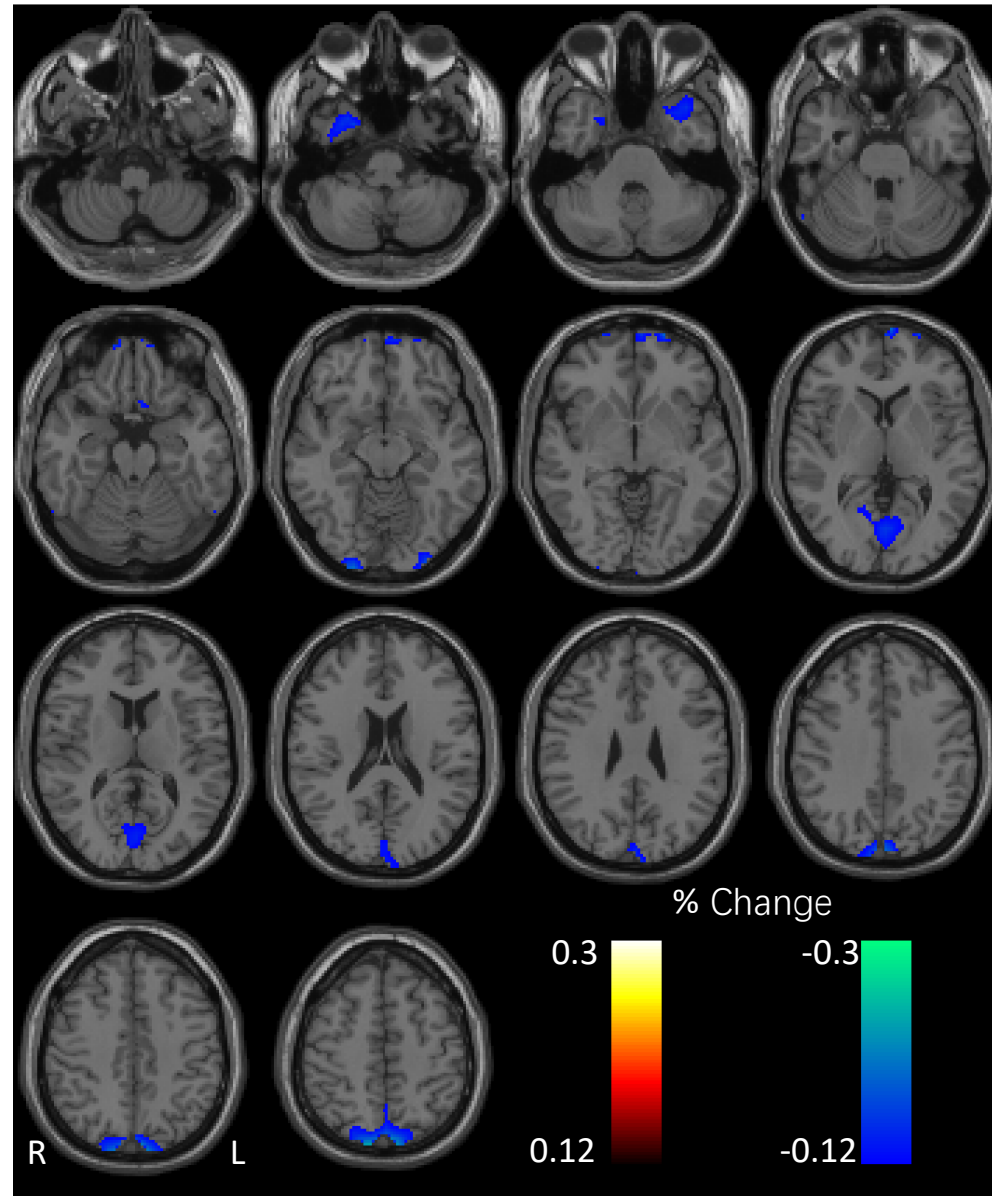

Rong Li et al.,  
2021 *Neuroimage*

14s

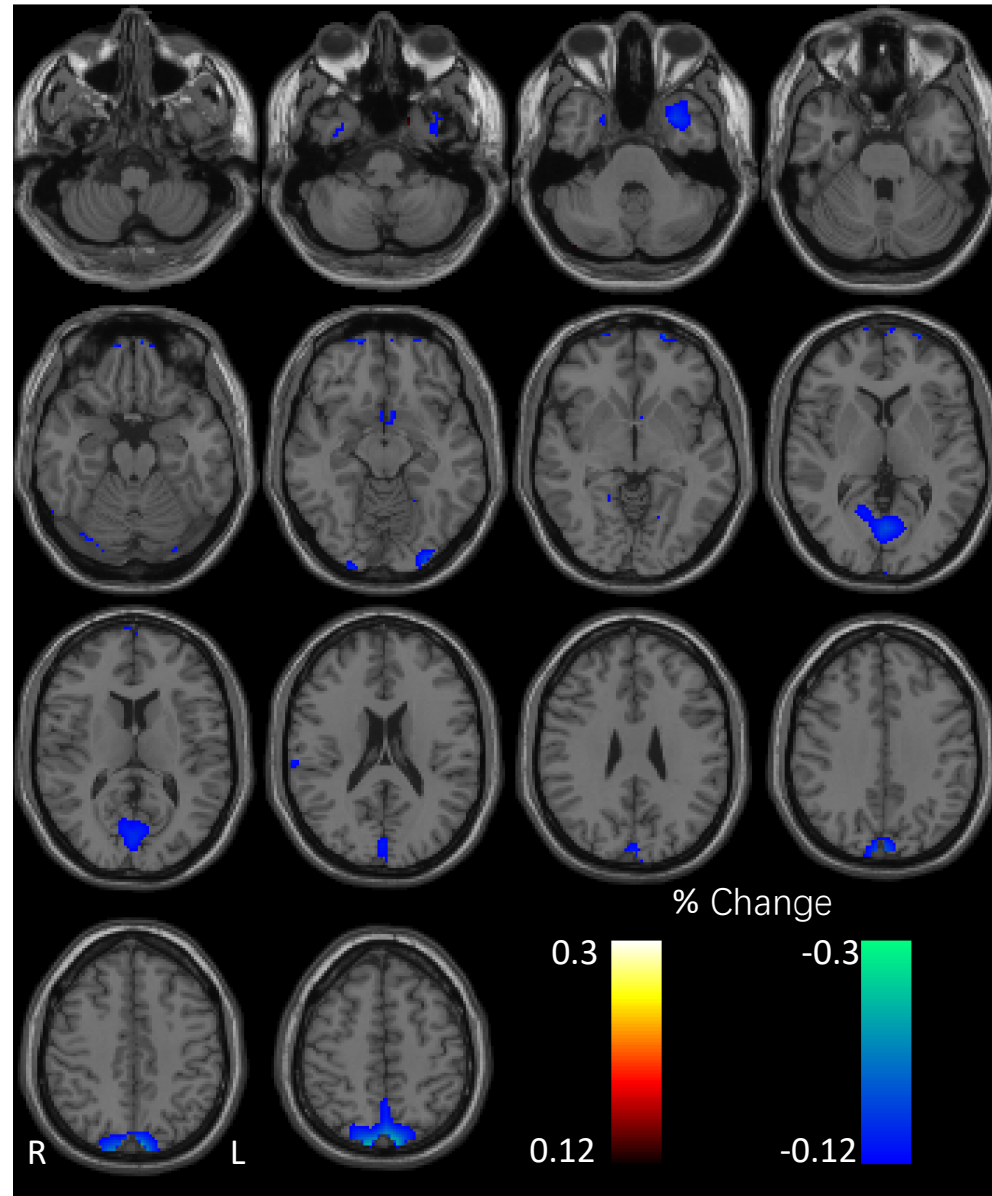

Rong Li et al.,  
2021 *Neuroimage*

15s

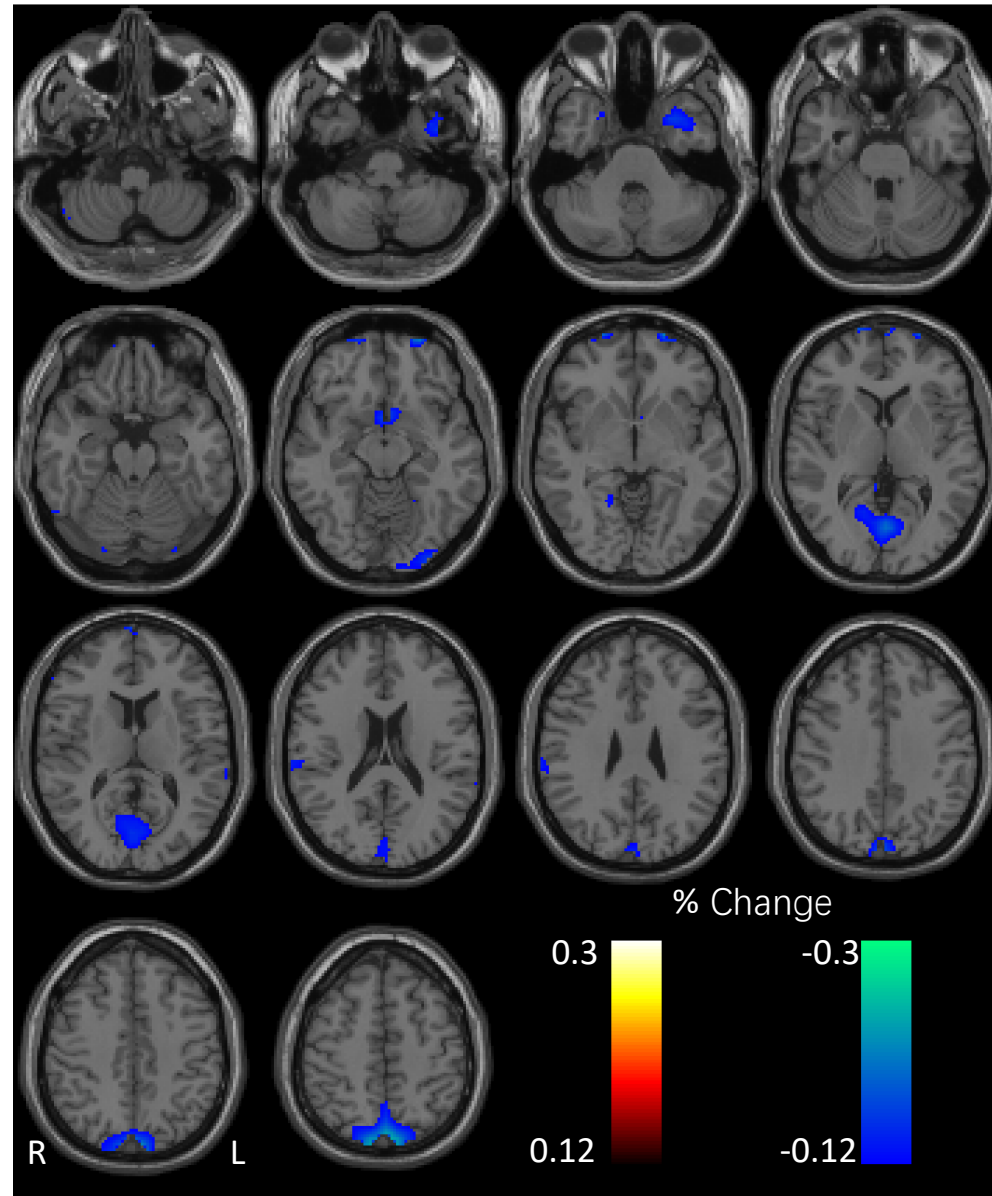

Rong Li et al.,  
2021 *Neuroimage*

16s

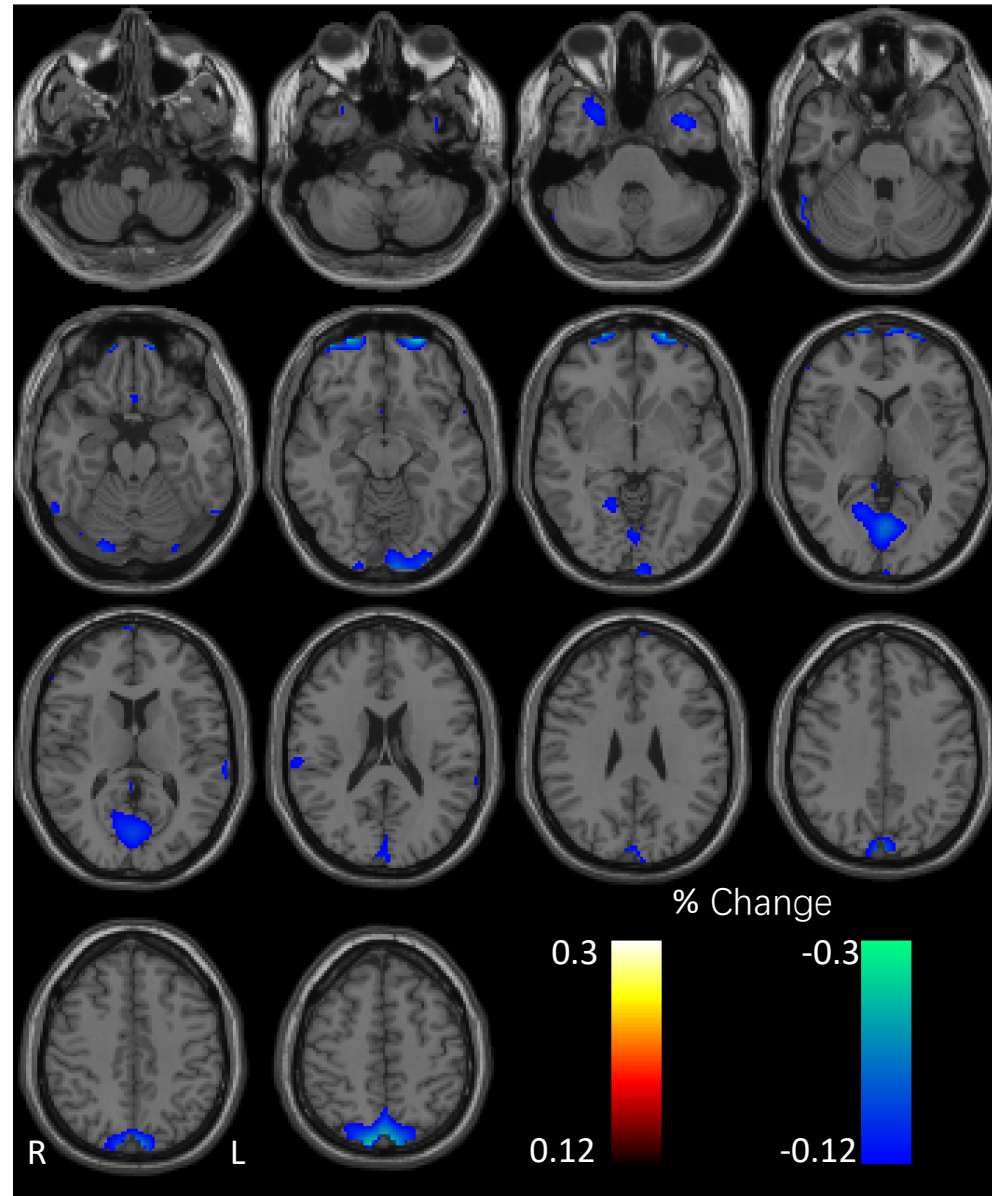

Rong Li et al.,  
2021 *Neuroimage*

17s

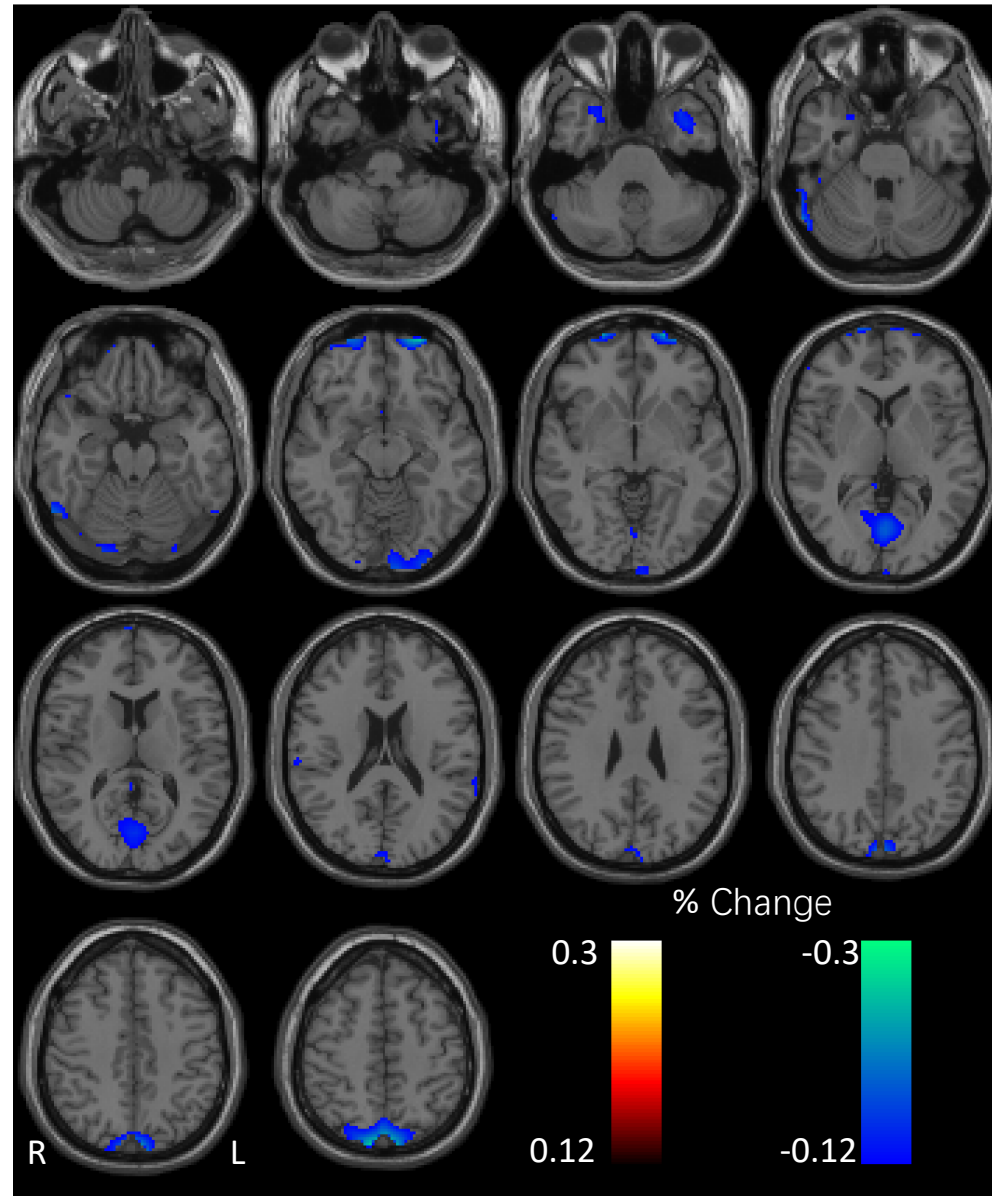

Rong Li et al.,  
2021 *Neuroimage*



18s

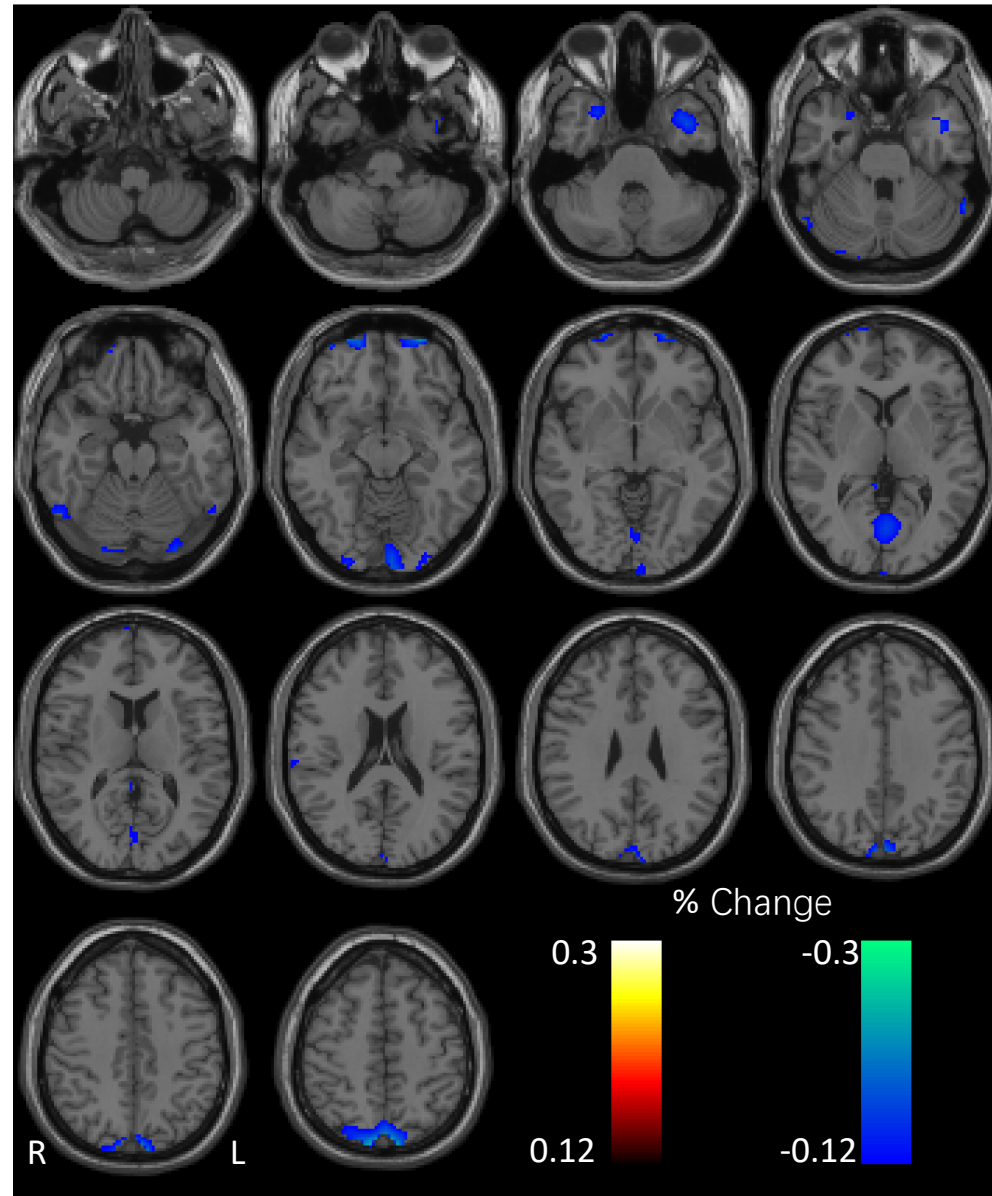

Rong Li et al.,  
2021 *Neuroimage*



19s

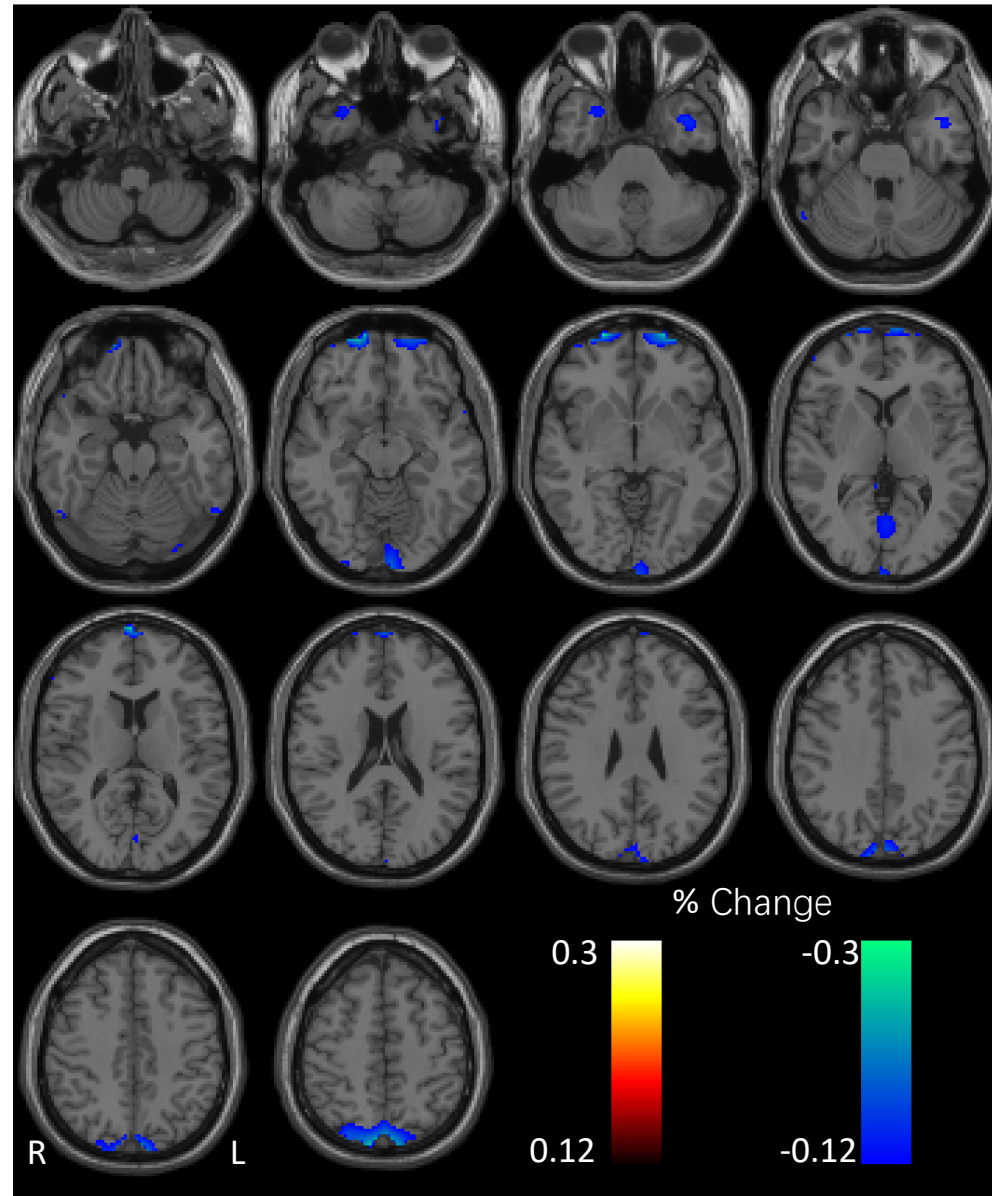

Rong Li et al.,  
2021 *Neuroimage*

20s

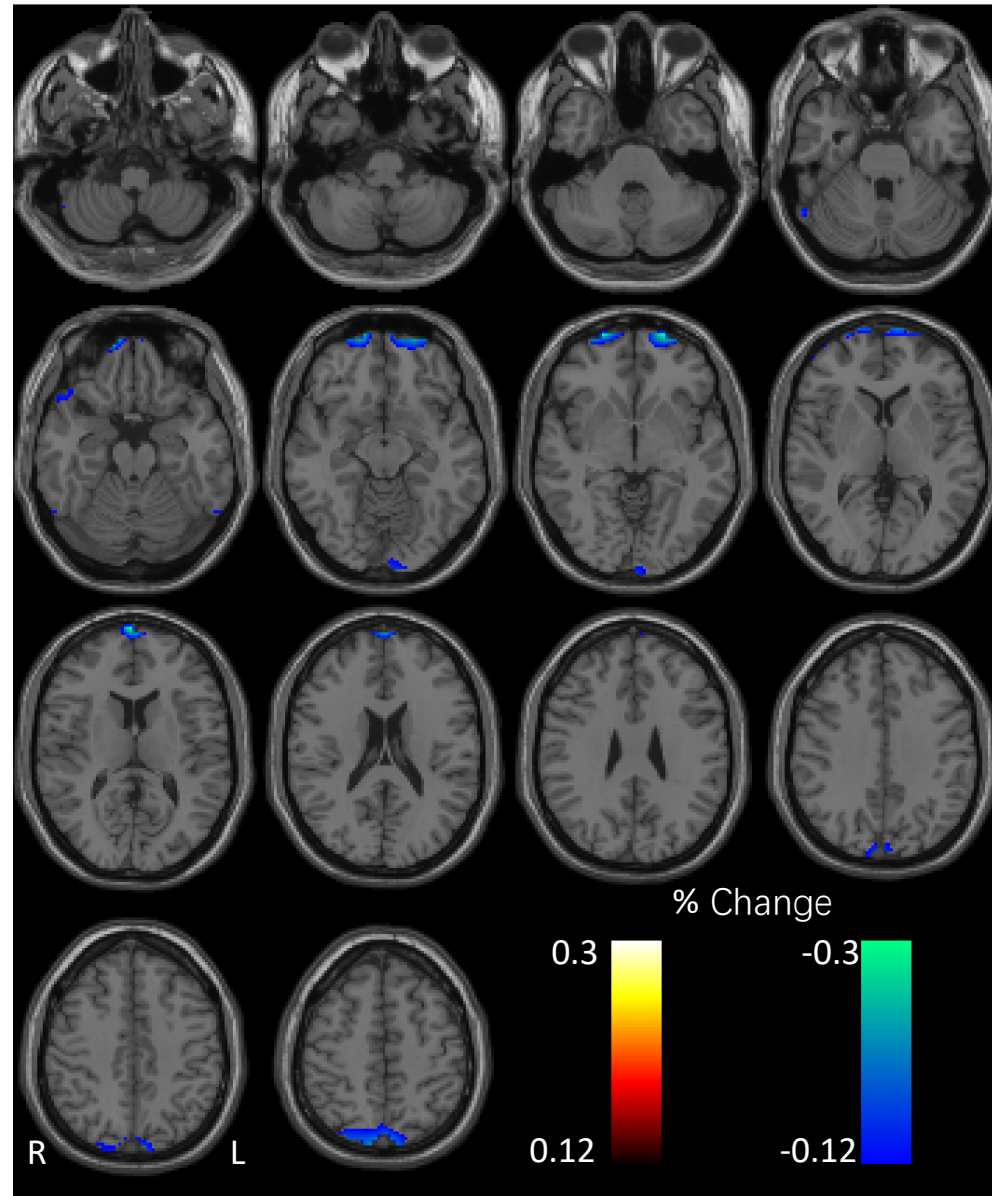

Rong Li et al.,  
2021 *Neuroimage*

21s

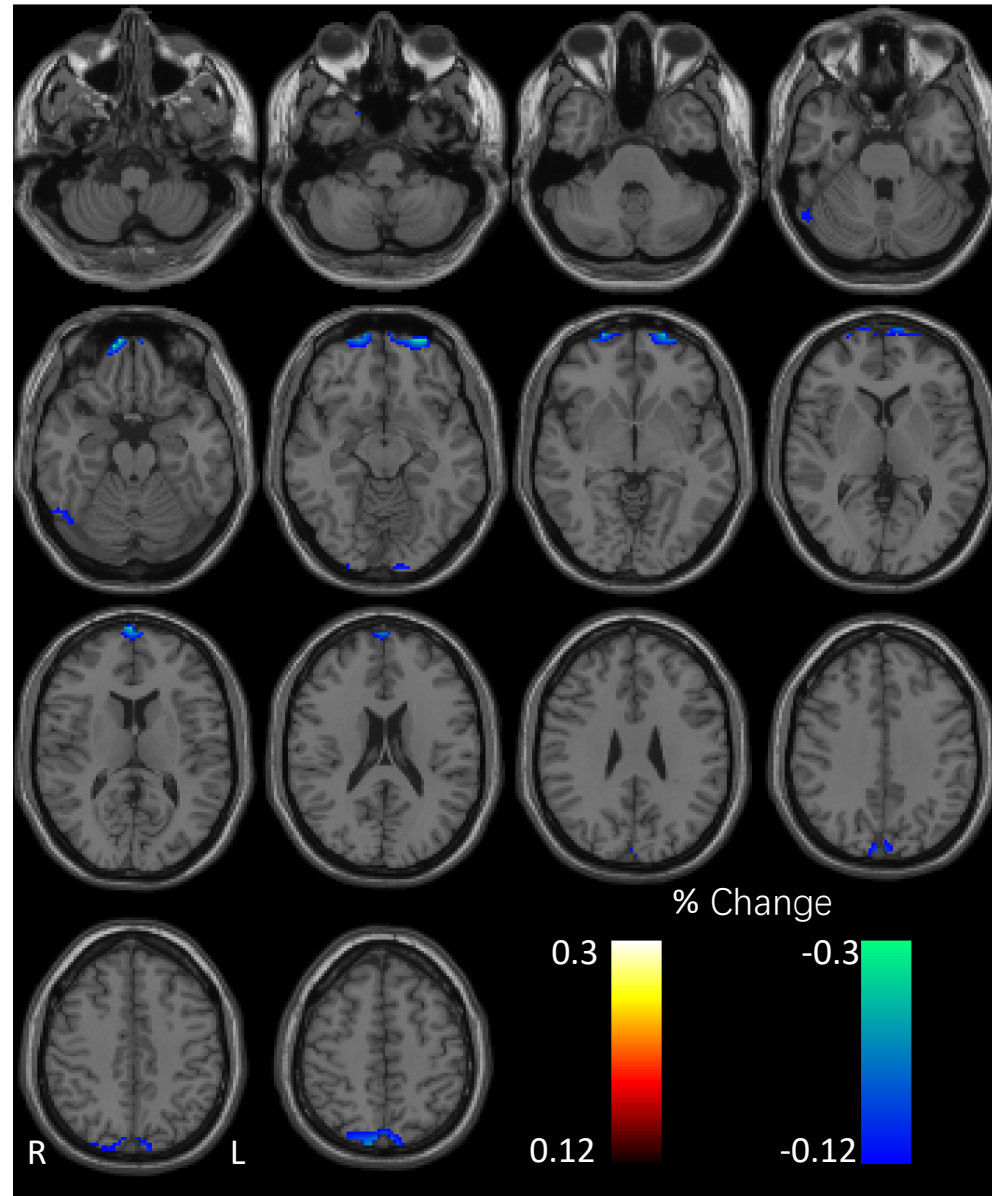

Rong Li et al.,  
2021 *Neuroimage*

22s

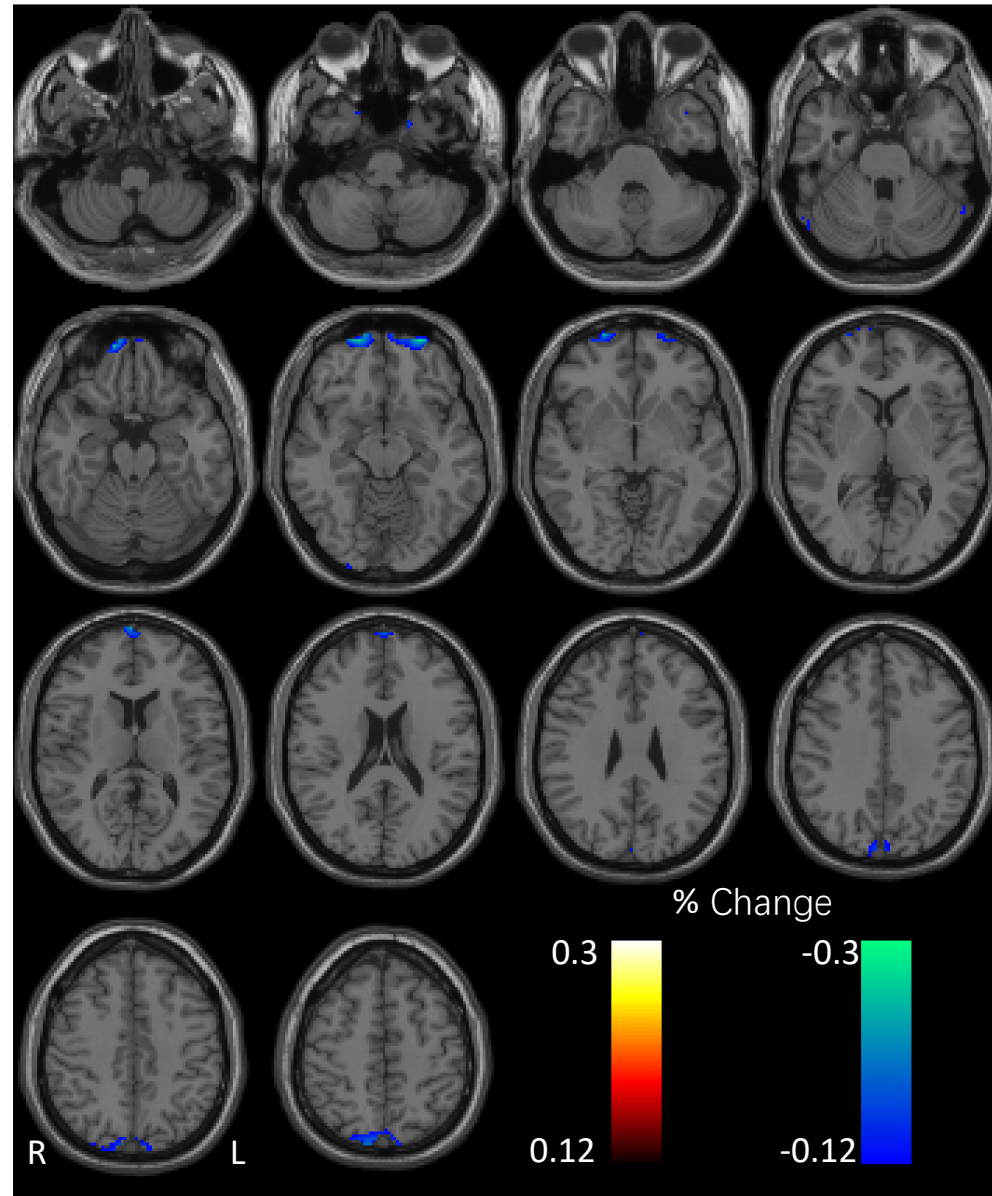

Rong Li et al.,  
2021 *Neuroimage*

23s

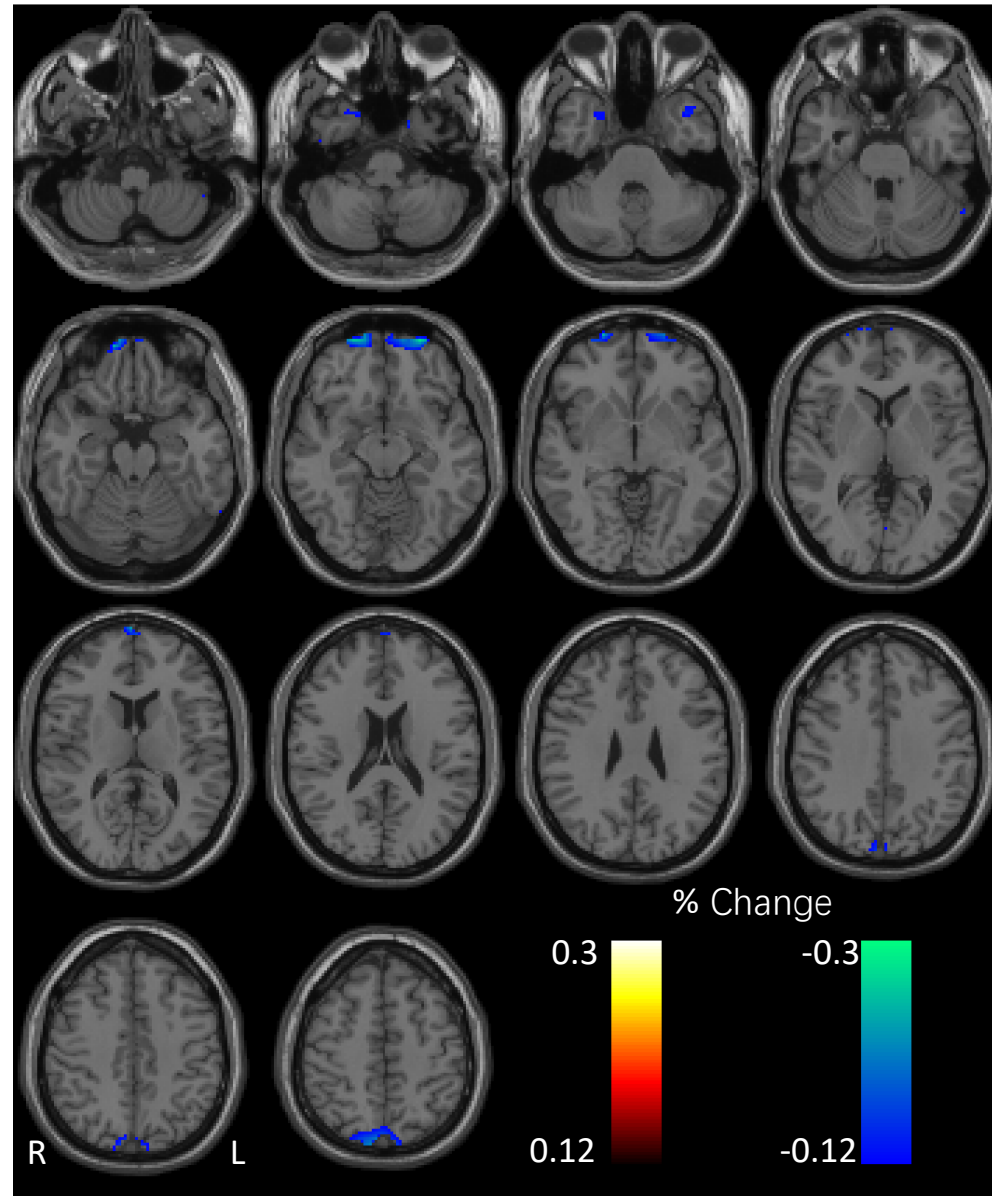

Rong Li et al.,  
2021 *Neuroimage*

24s

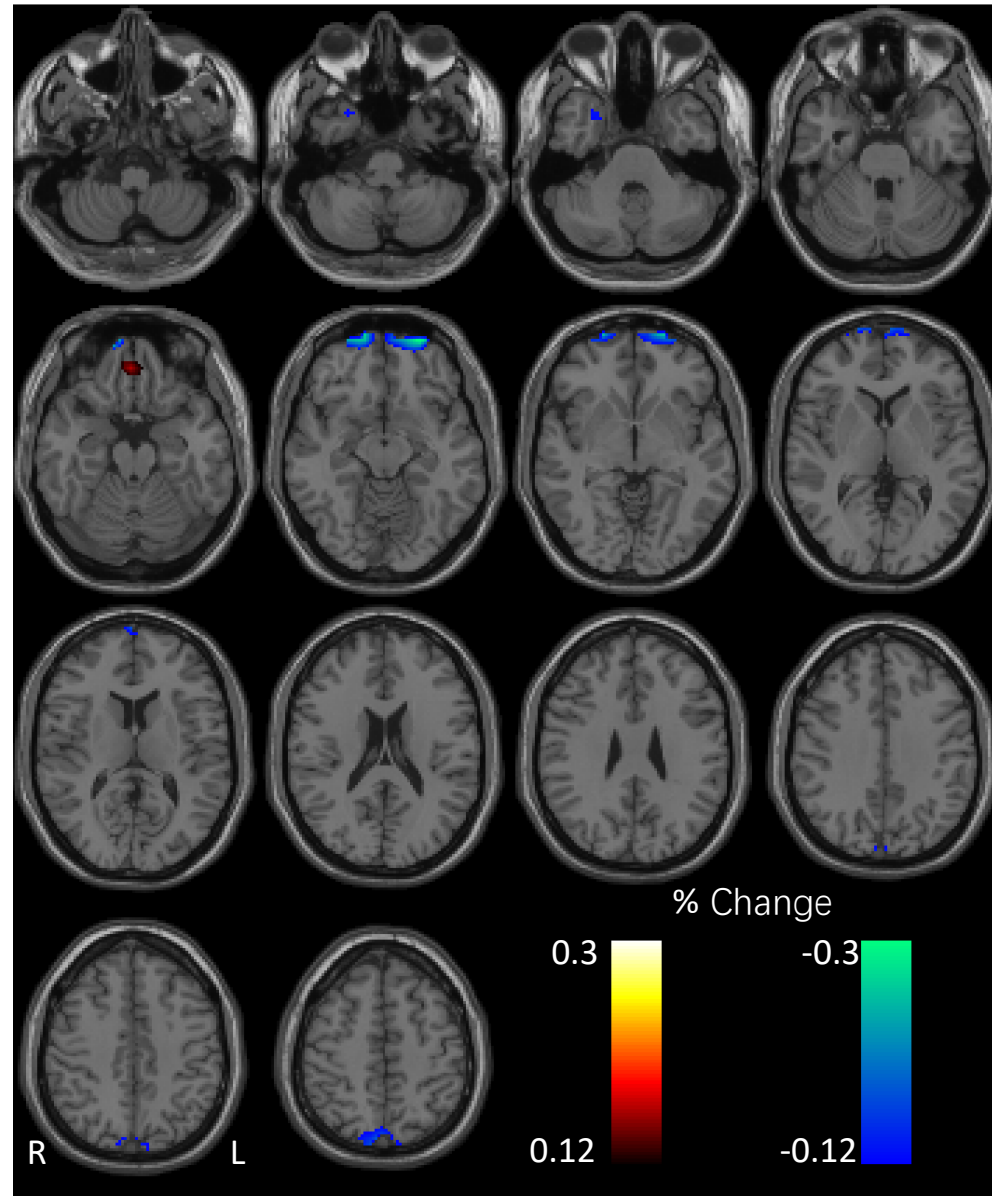

Rong Li et al.,  
2021 *Neuroimage*

25s

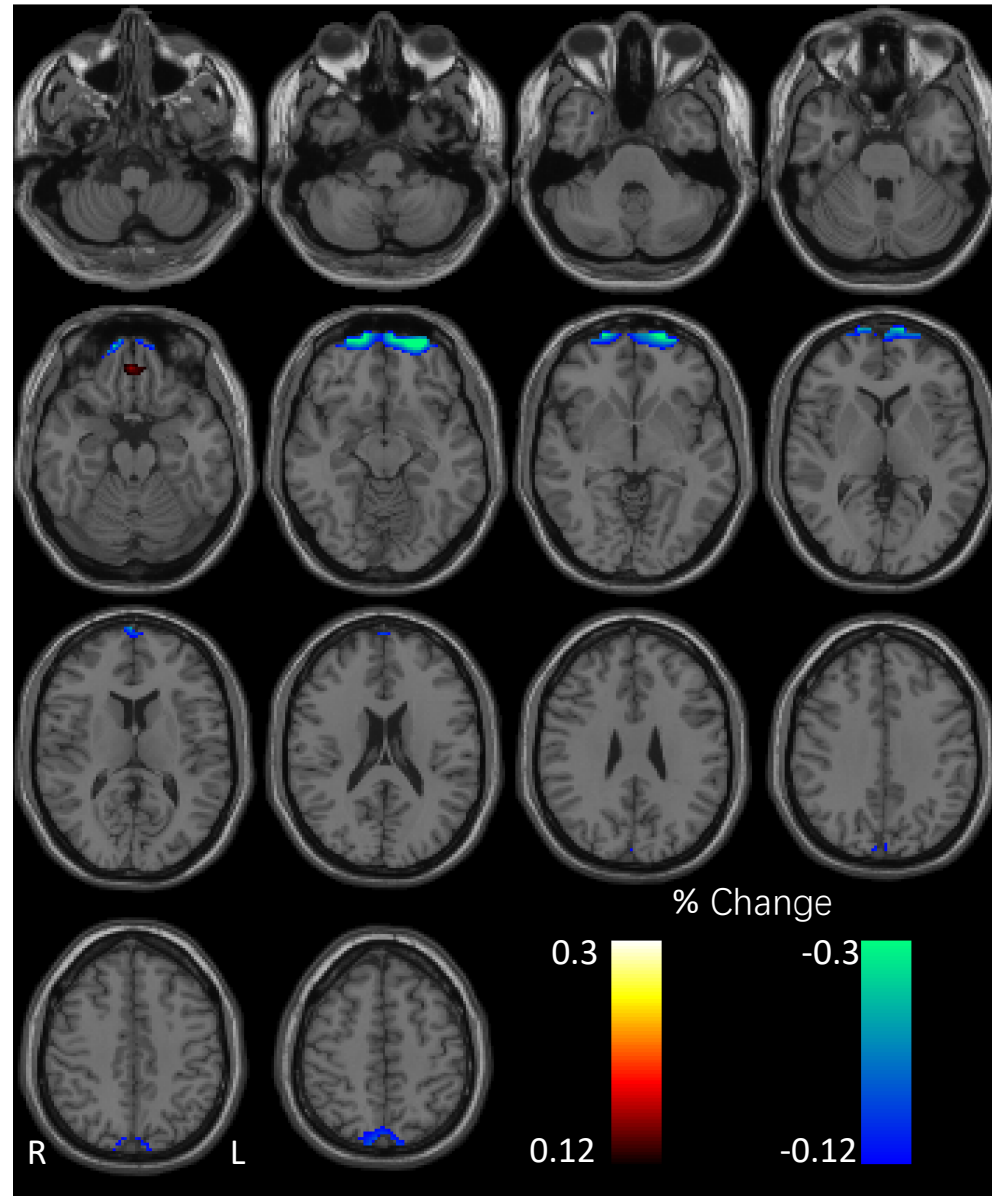

Rong Li et al.,  
2021 *Neuroimage*



26s

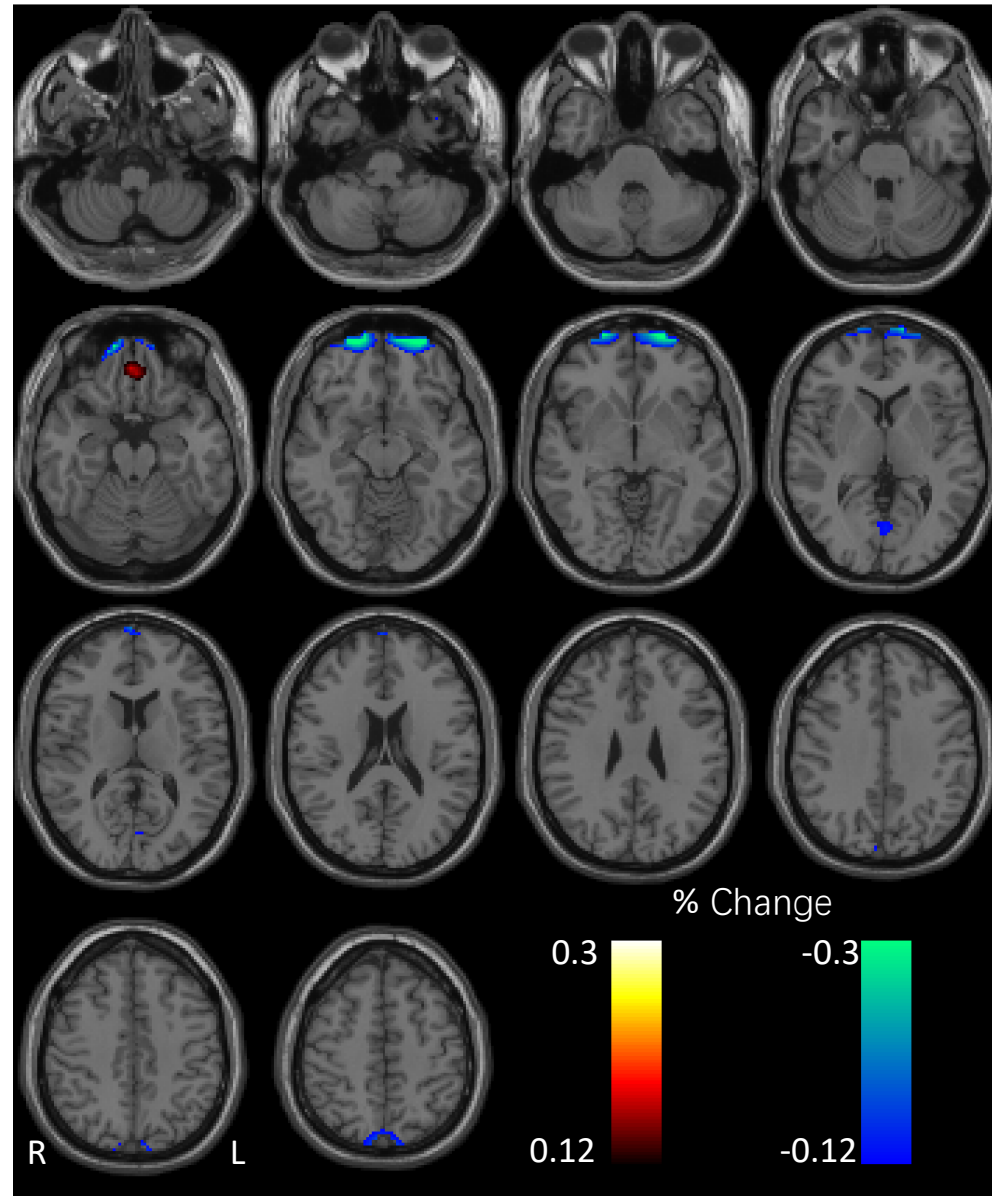

Rong Li et al.,  
2021 *Neuroimage*



27s

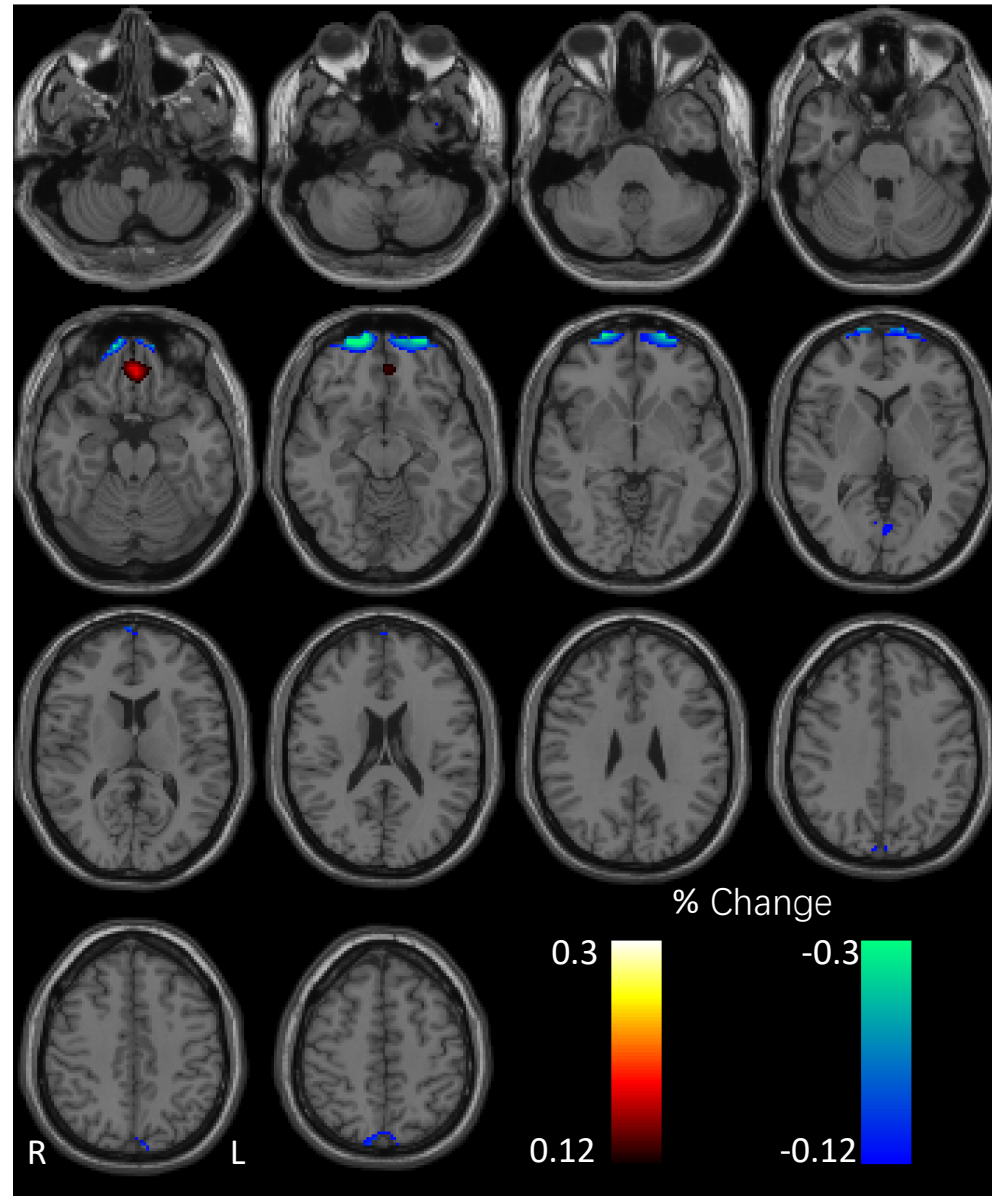

Rong Li et al.,  
2021 *Neuroimage*

28s

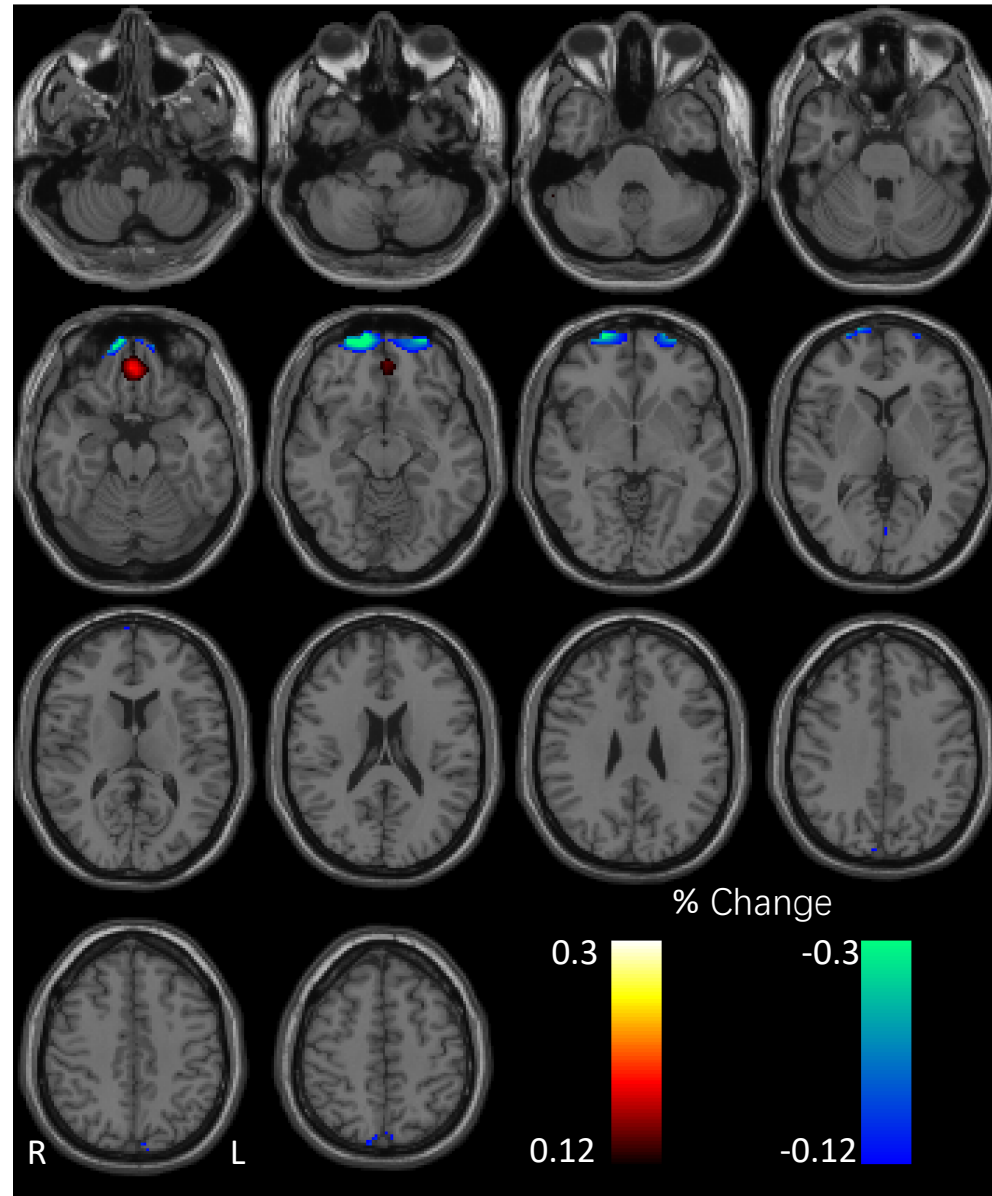

Rong Li et al.,  
2021 *Neuroimage*

29s

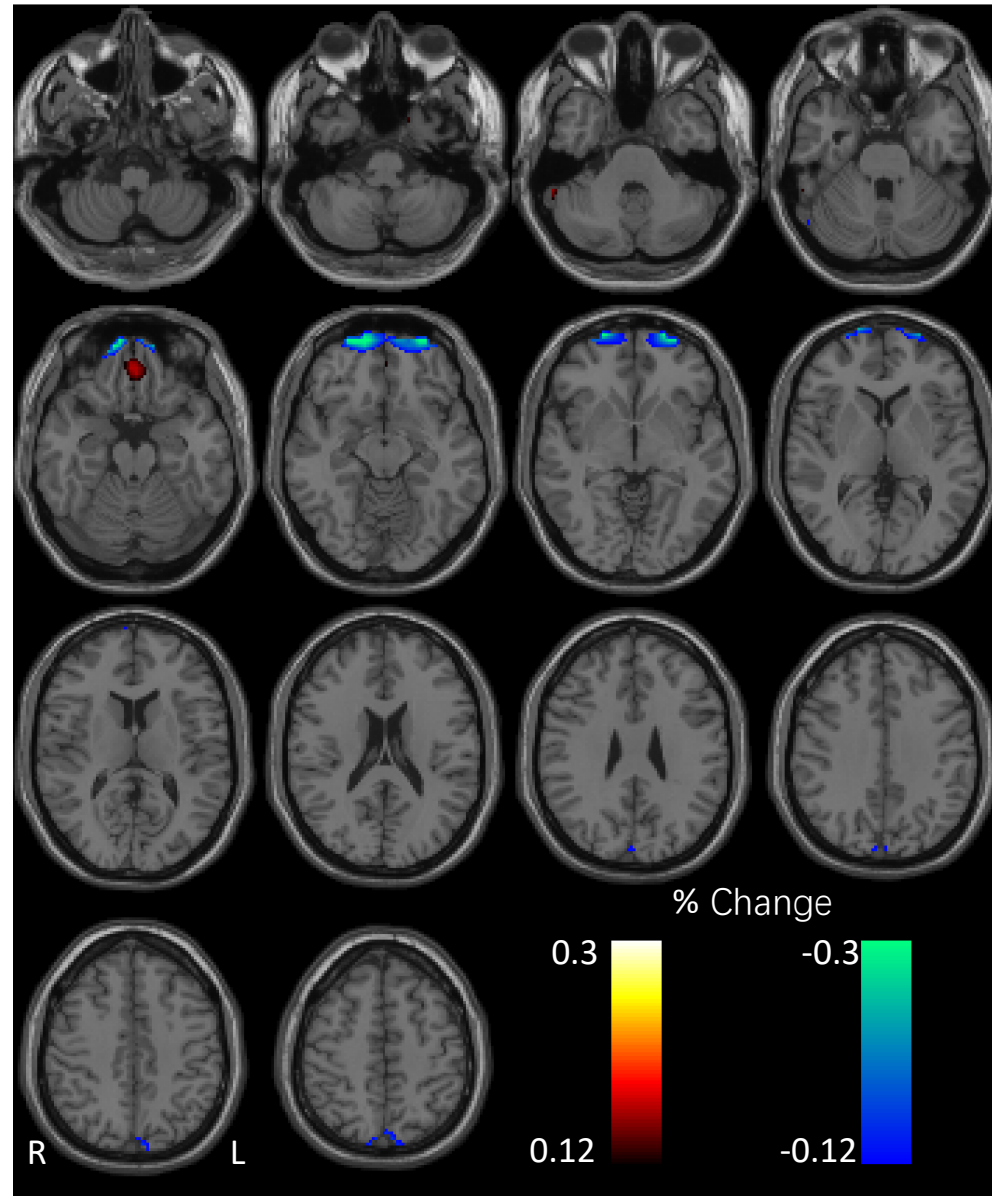

Rong Li et al.,  
2021 *Neuroimage*

30s

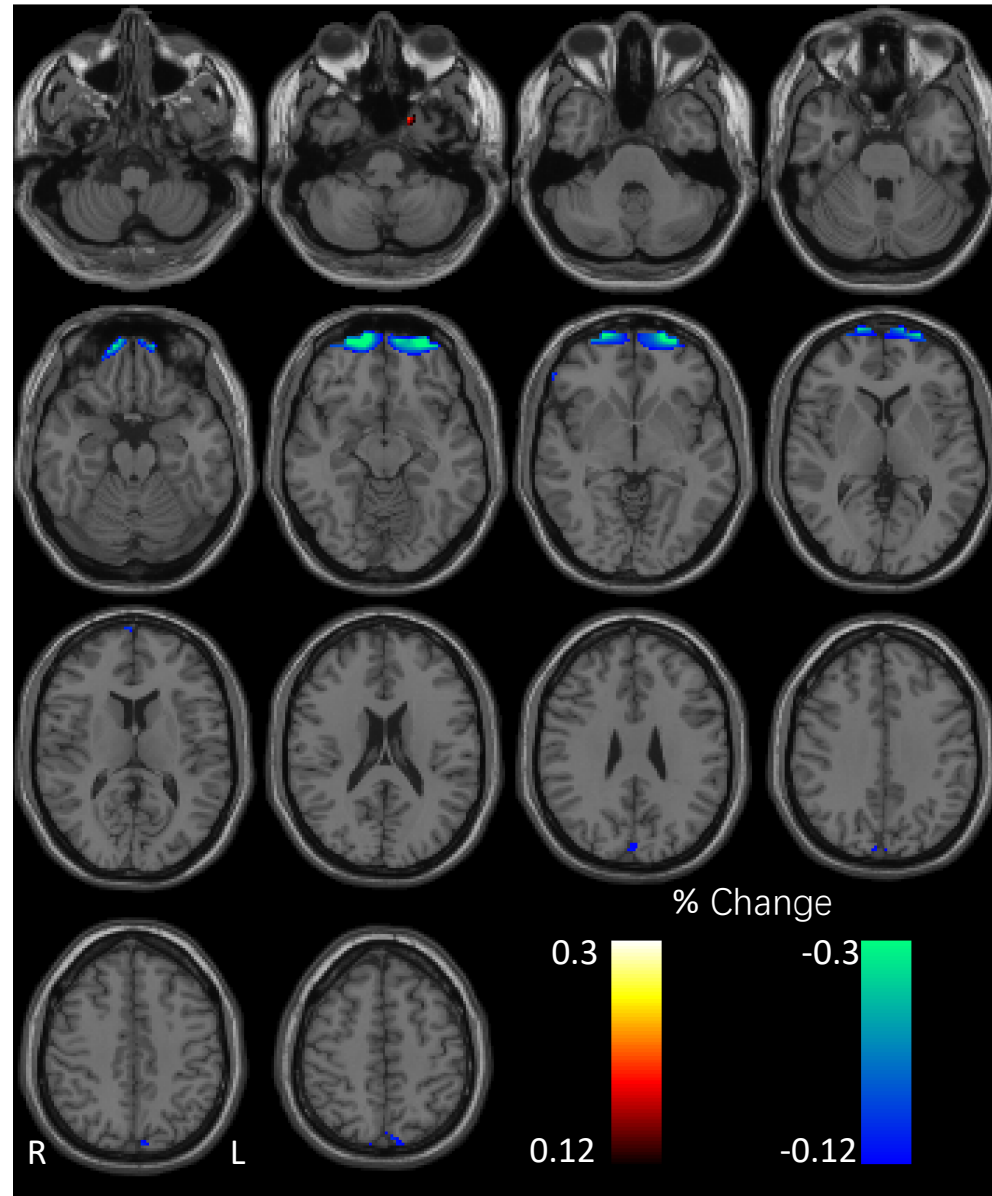

Rong Li et al.,  
2021 *Neuroimage*

31s

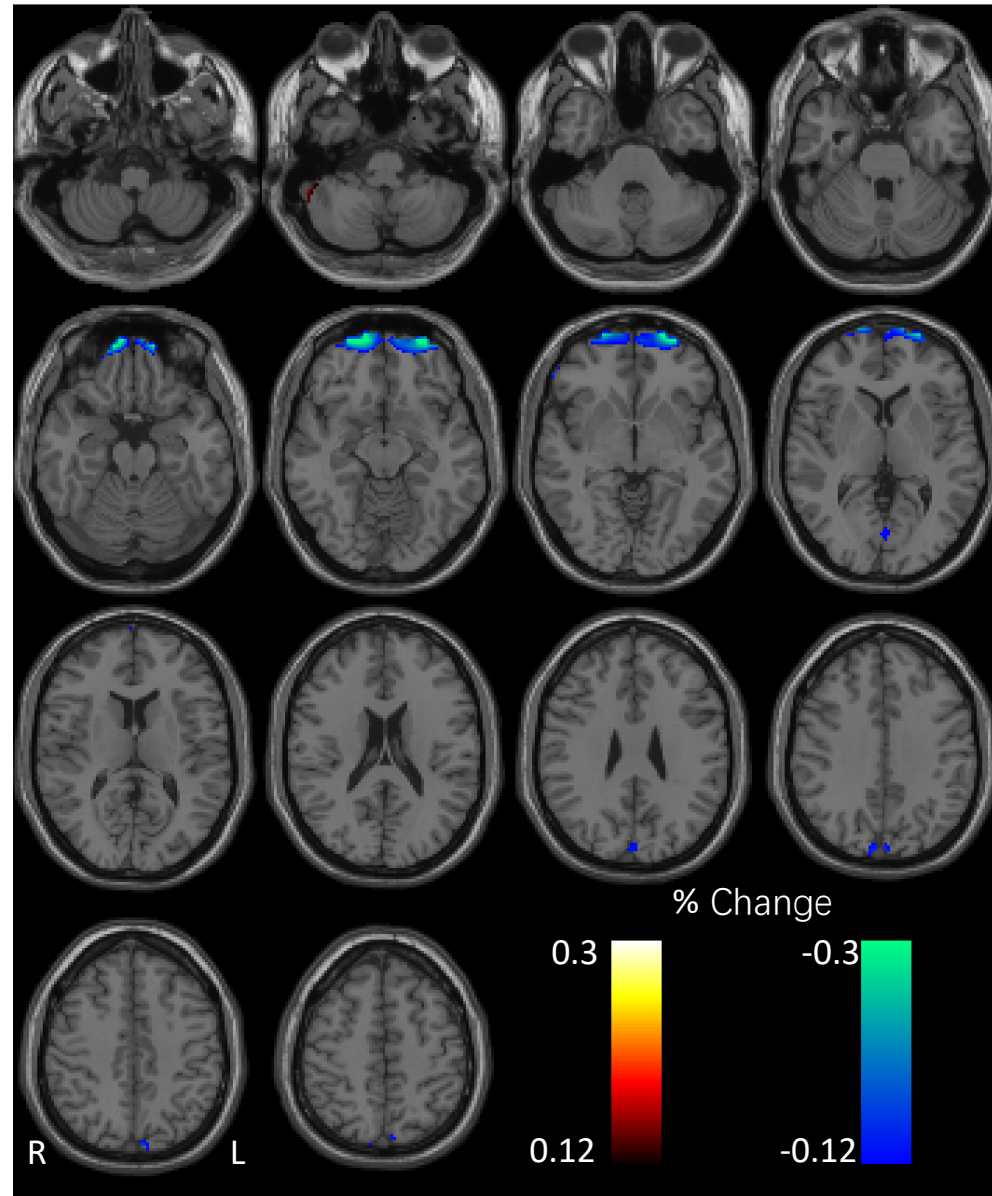

Rong Li et al.,  
2021 *Neuroimage*

32s

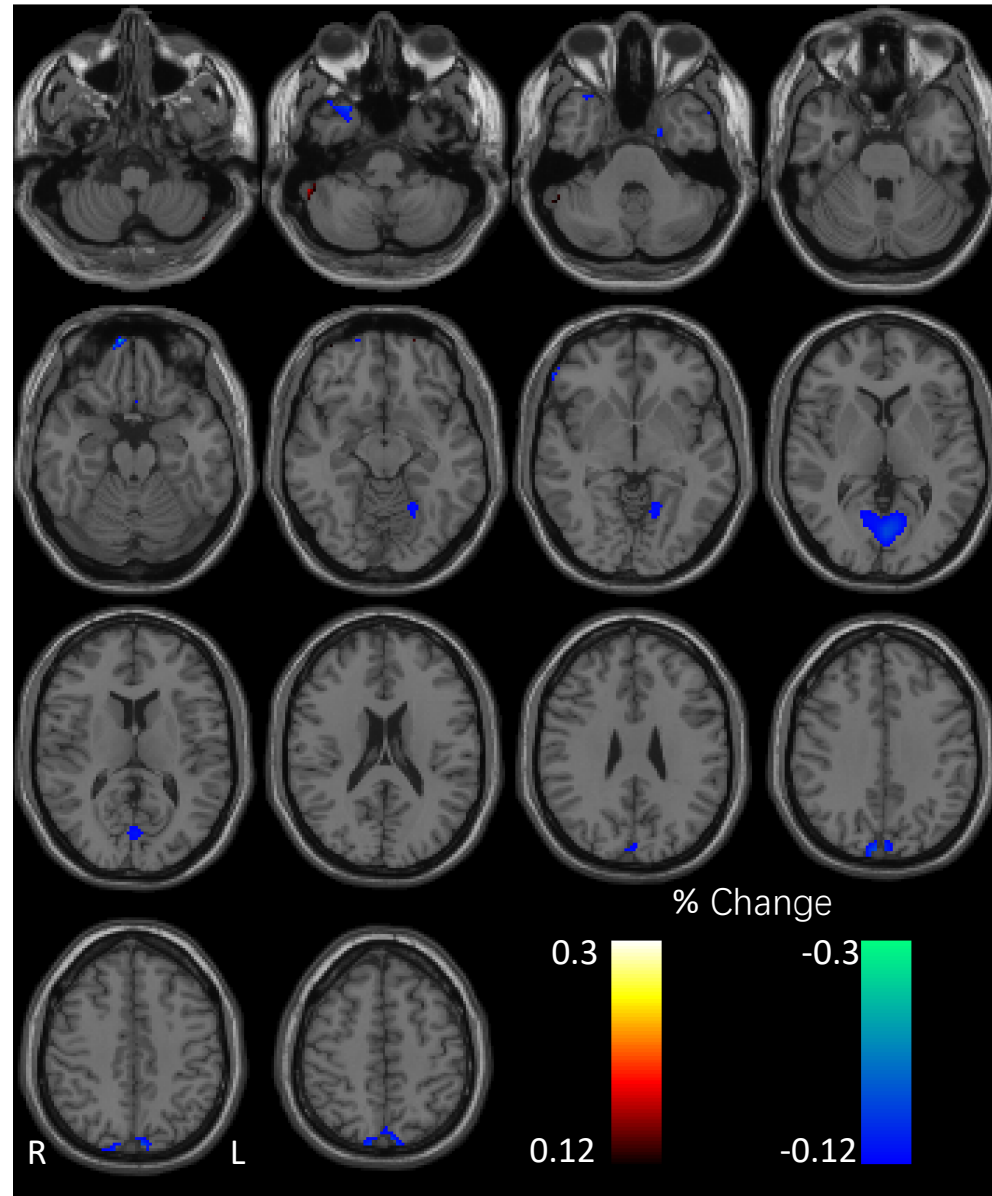

Rong Li et al.,  
2021 *Neuroimage*

33s

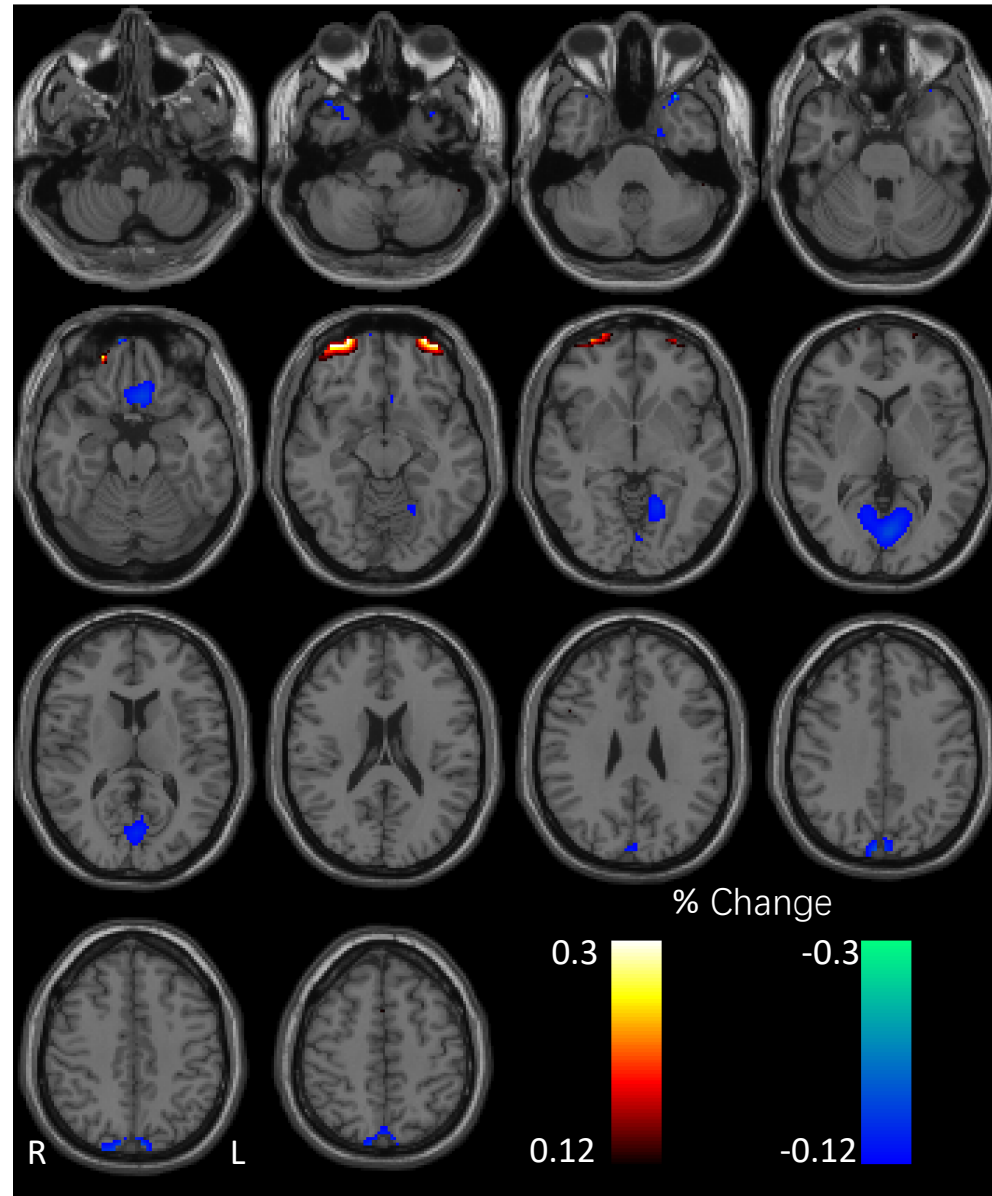

Rong Li et al.,  
2021 *Neuroimage*



34s

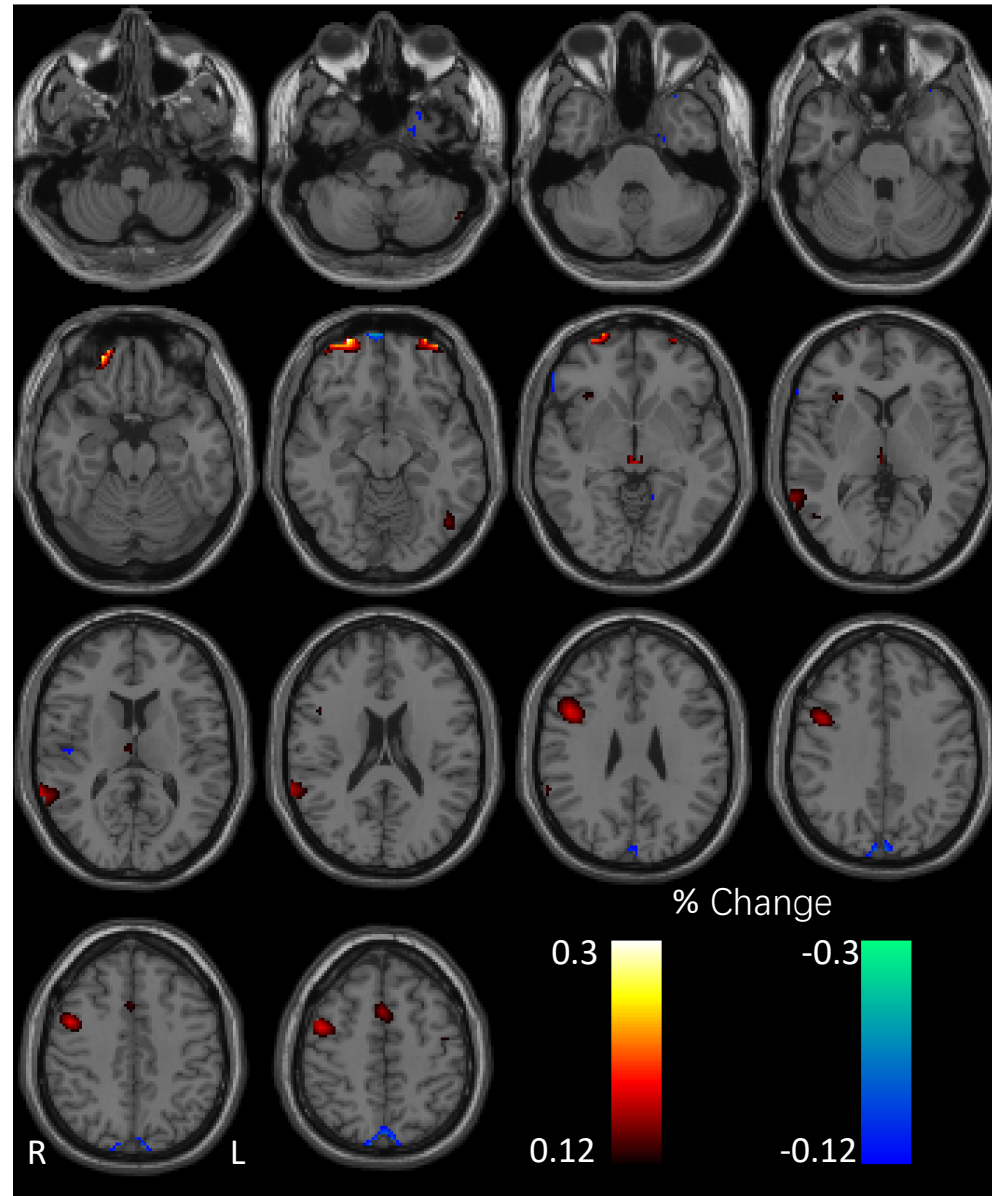

Rong Li et al.,  
2021 *Neuroimage*



35s

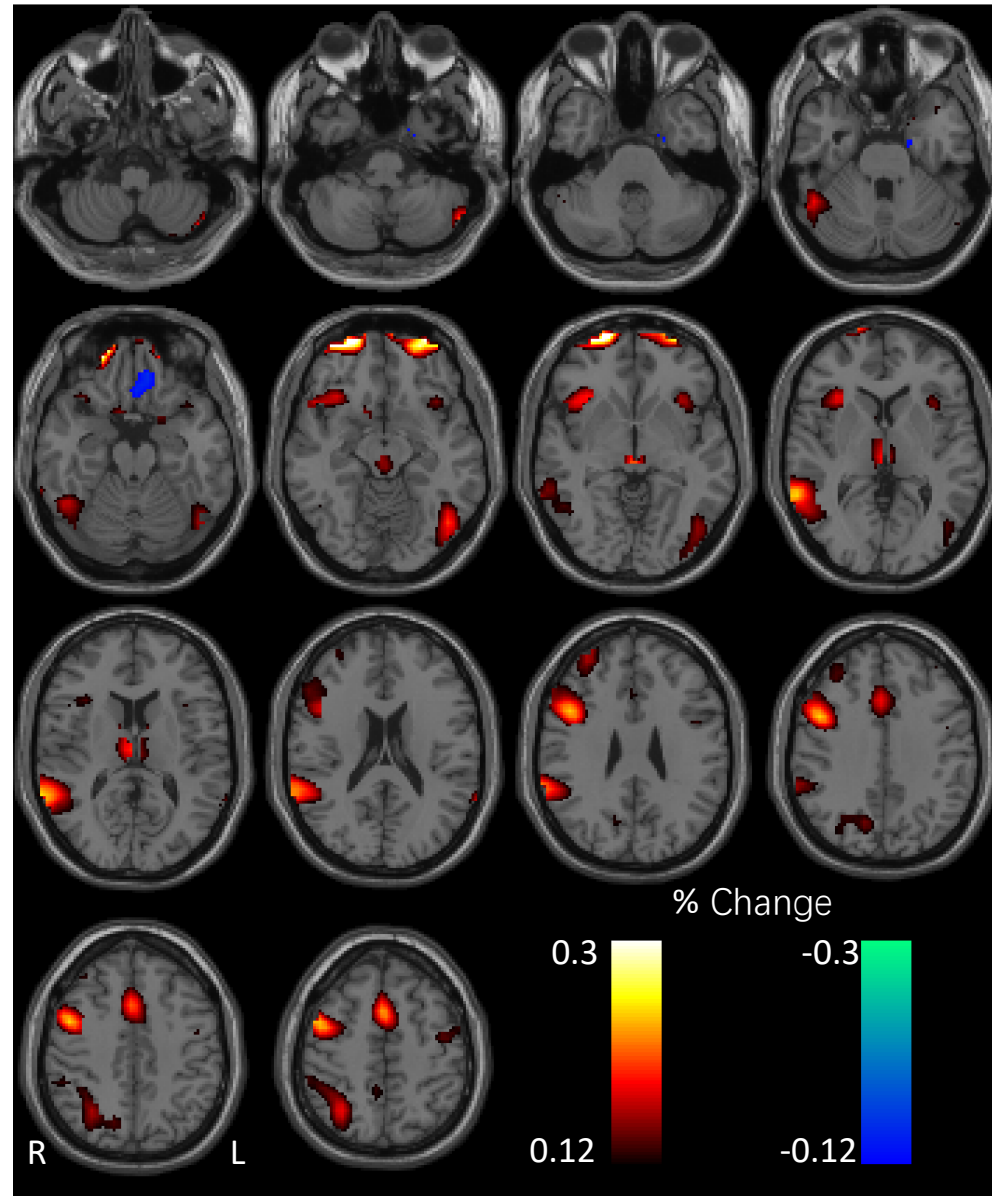

Rong Li et al.,  
2021 *Neuroimage*

36s

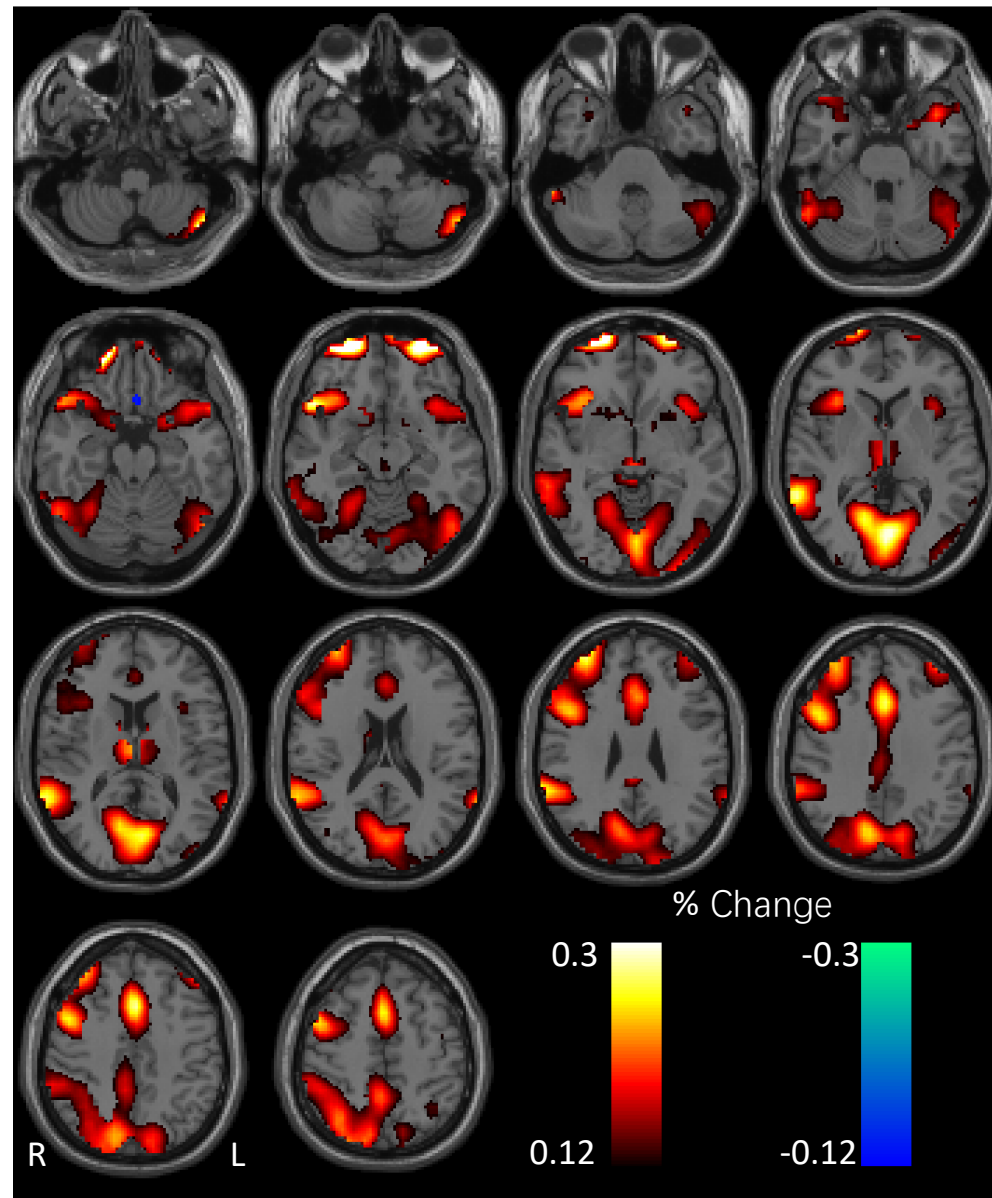

Rong Li et al.,  
2021 *Neuroimage*

37s

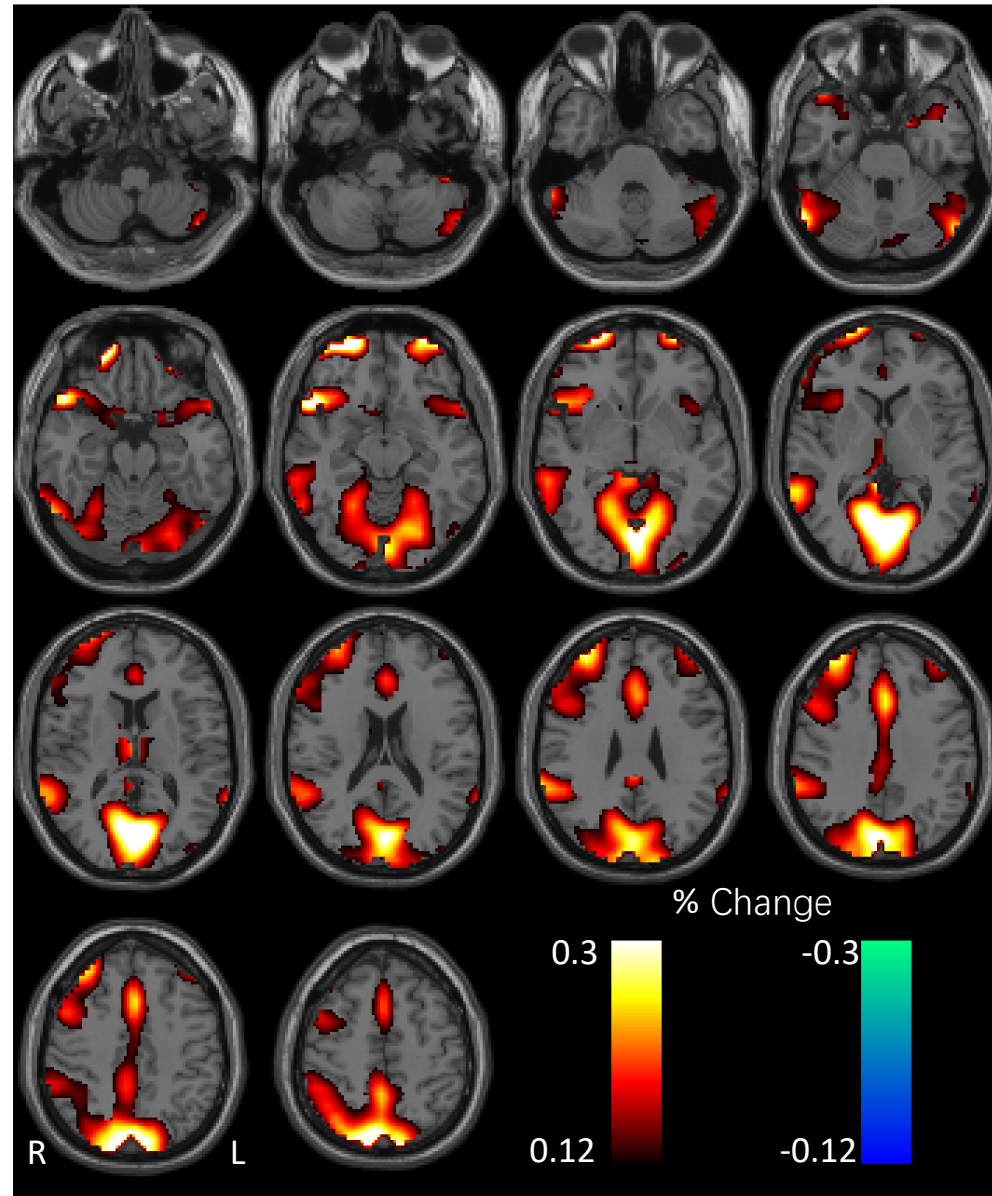

Rong Li et al.,  
2021 *Neuroimage*

38s

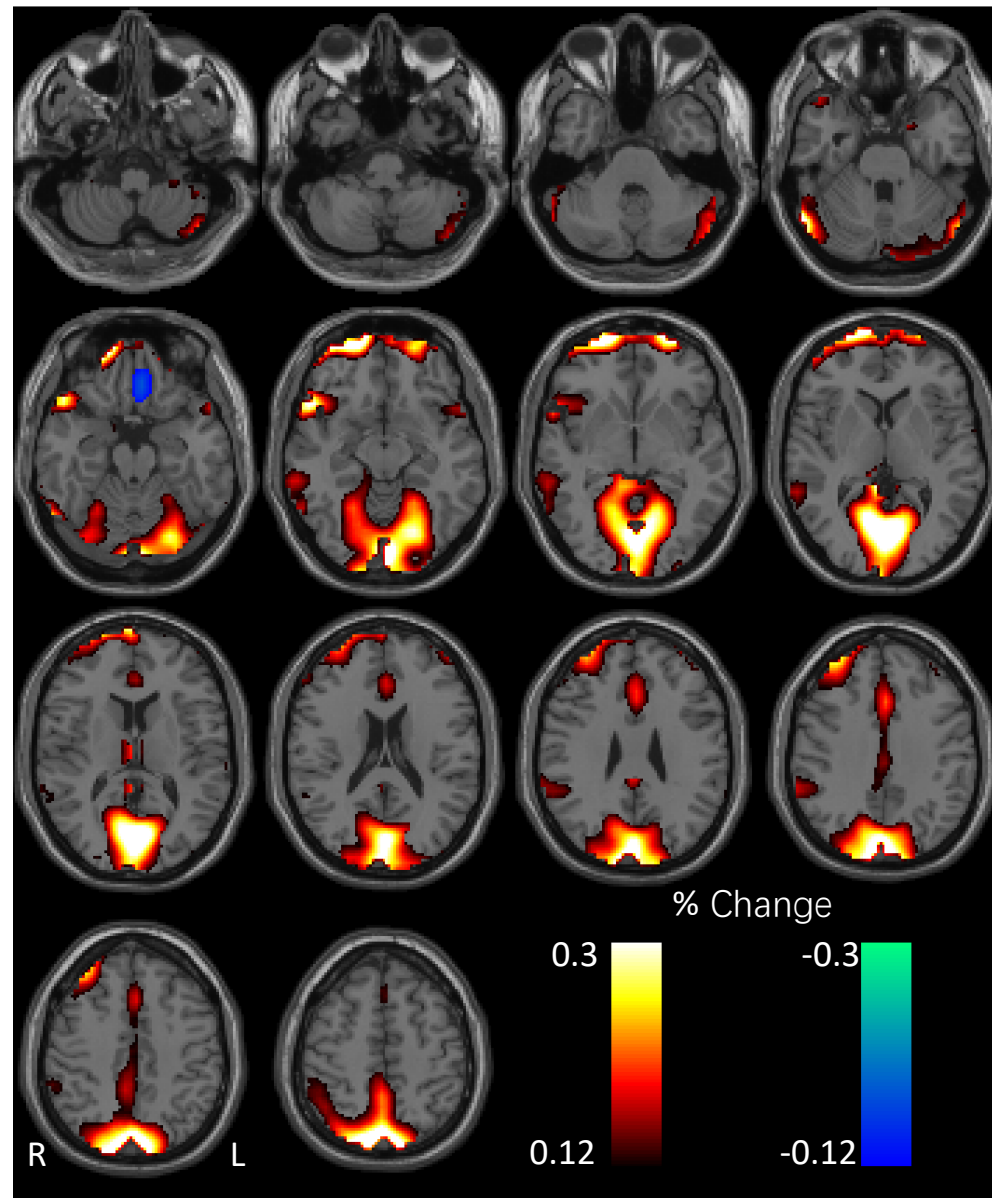

Rong Li et al.,  
2021 *Neuroimage*

39s

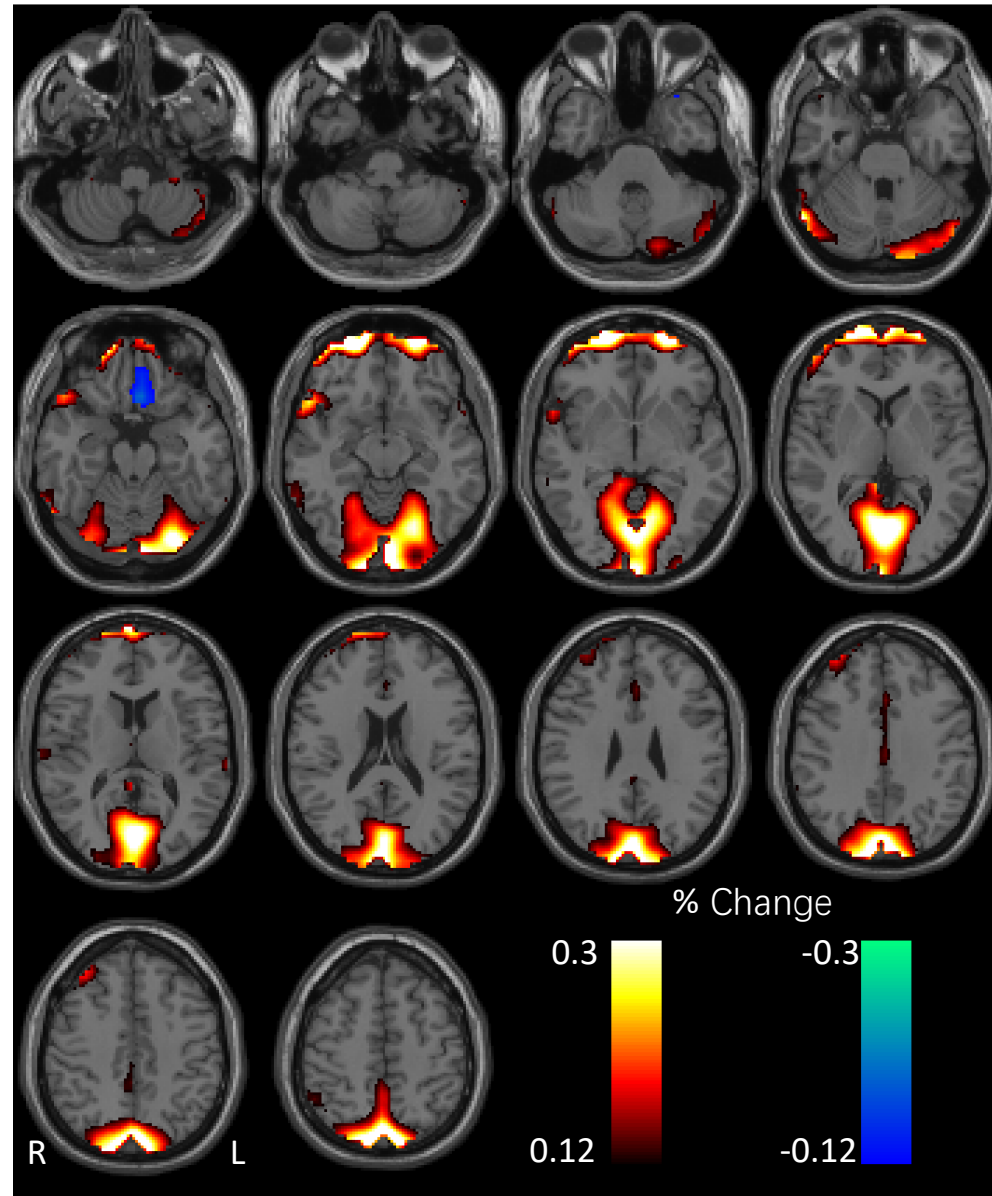

Rong Li et al.,  
2021 *Neuroimage*

40s

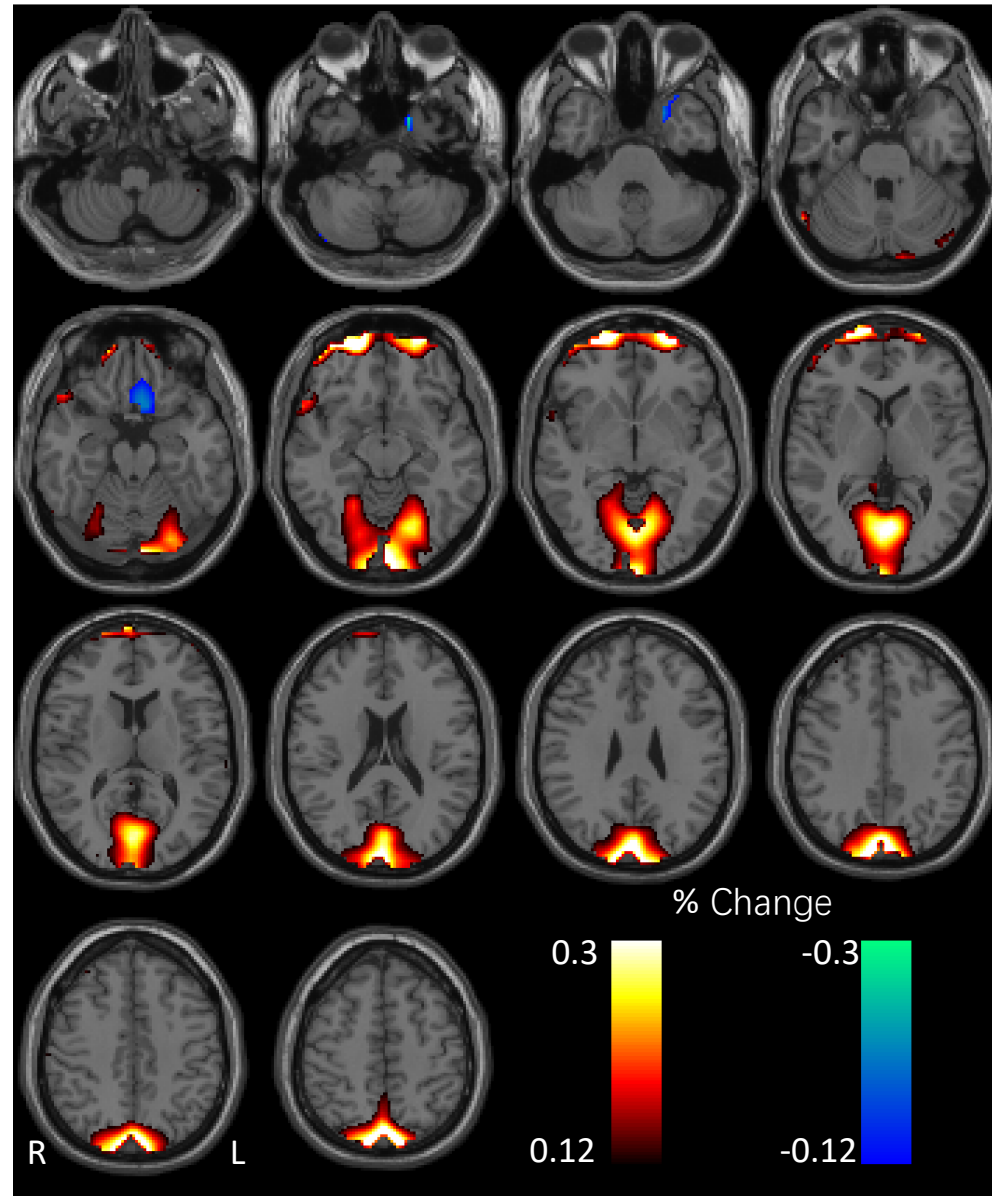

Rong Li et al.,  
2021 *Neuroimage*

41s

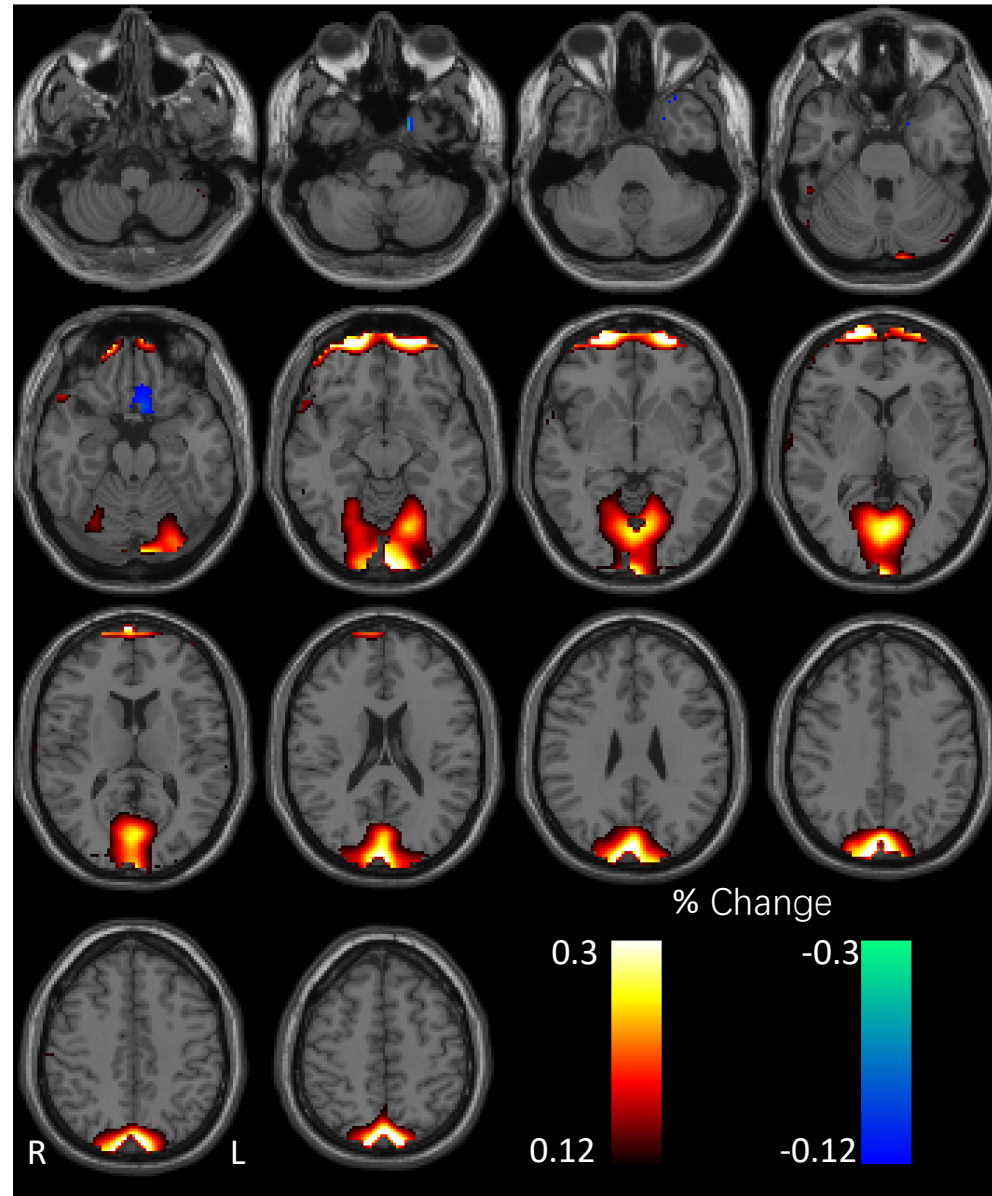

Rong Li et al.,  
2021 *Neuroimage*



42s

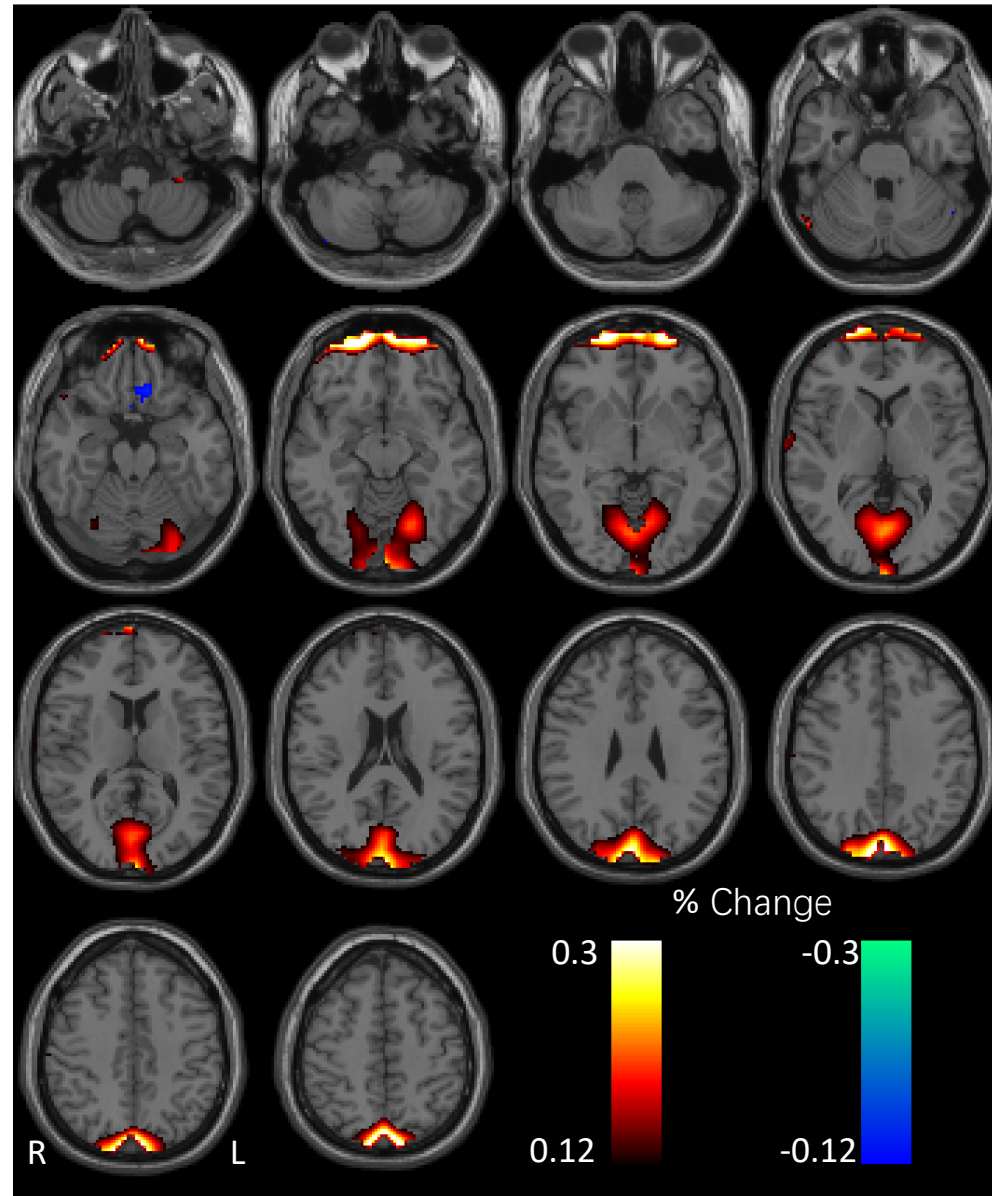

Rong Li et al.,  
2021 *Neuroimage*

43s

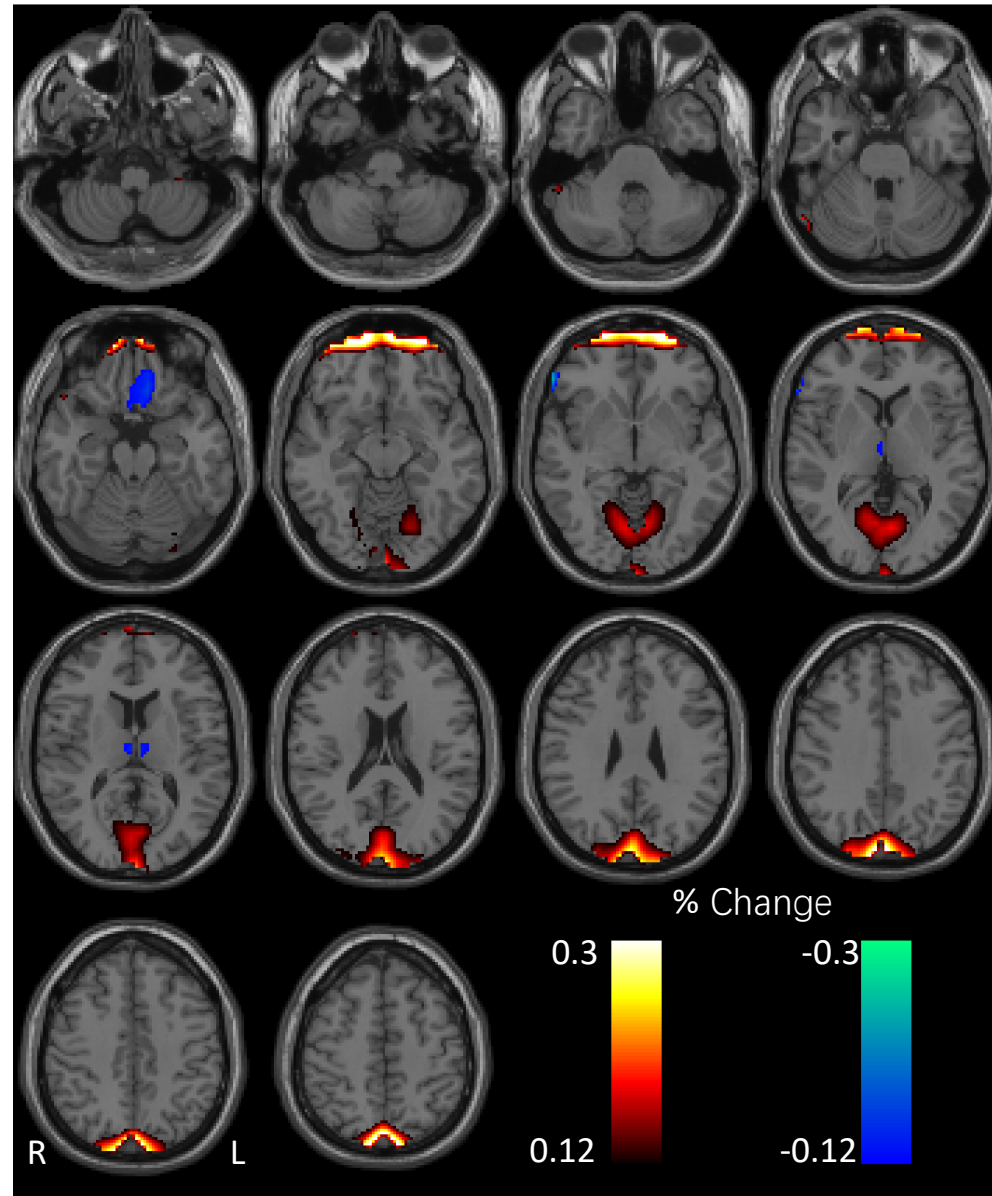

Rong Li et al.,  
2021 *Neuroimage*

44s

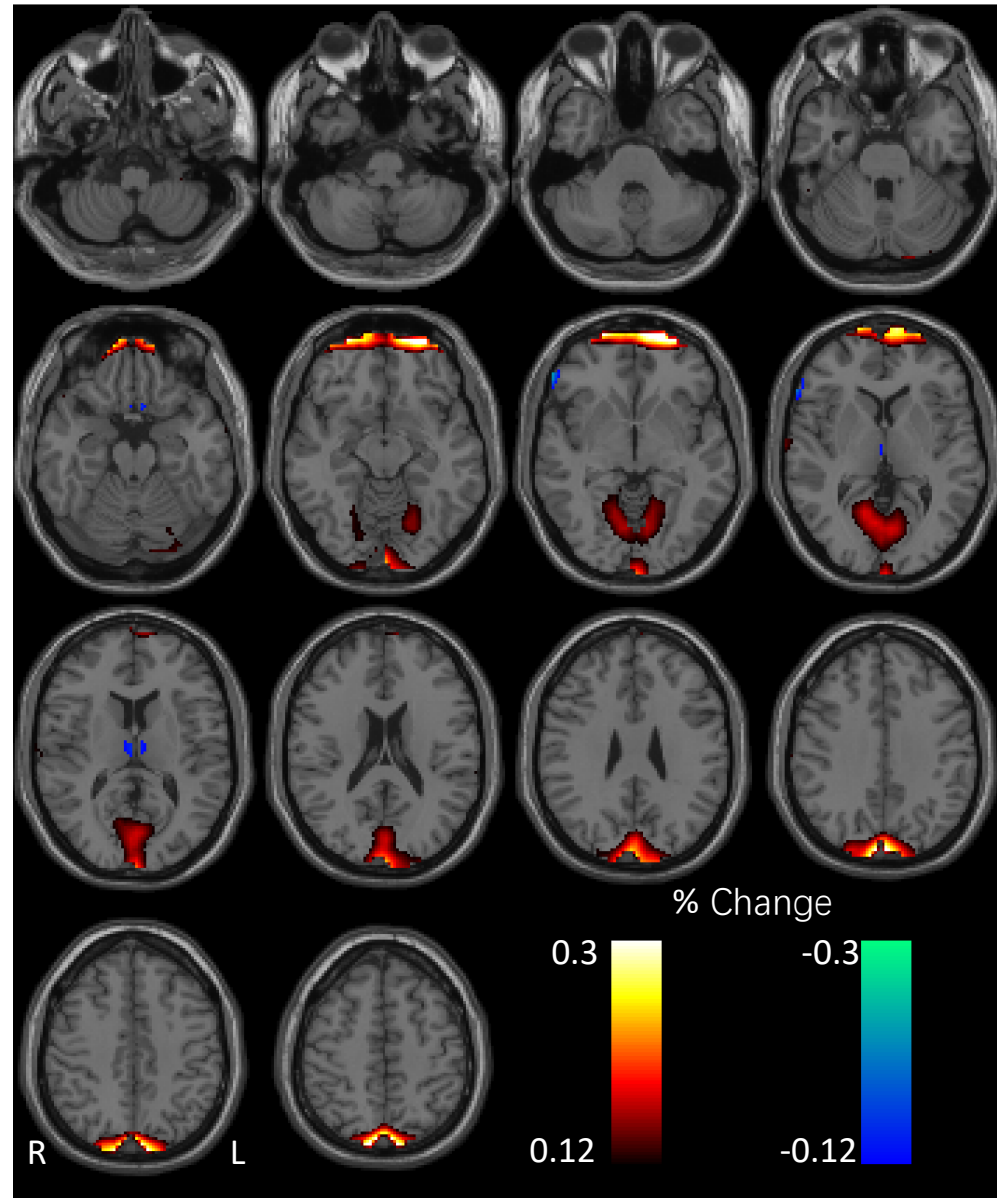

Rong Li et al.,  
2021 *Neuroimage*

45s

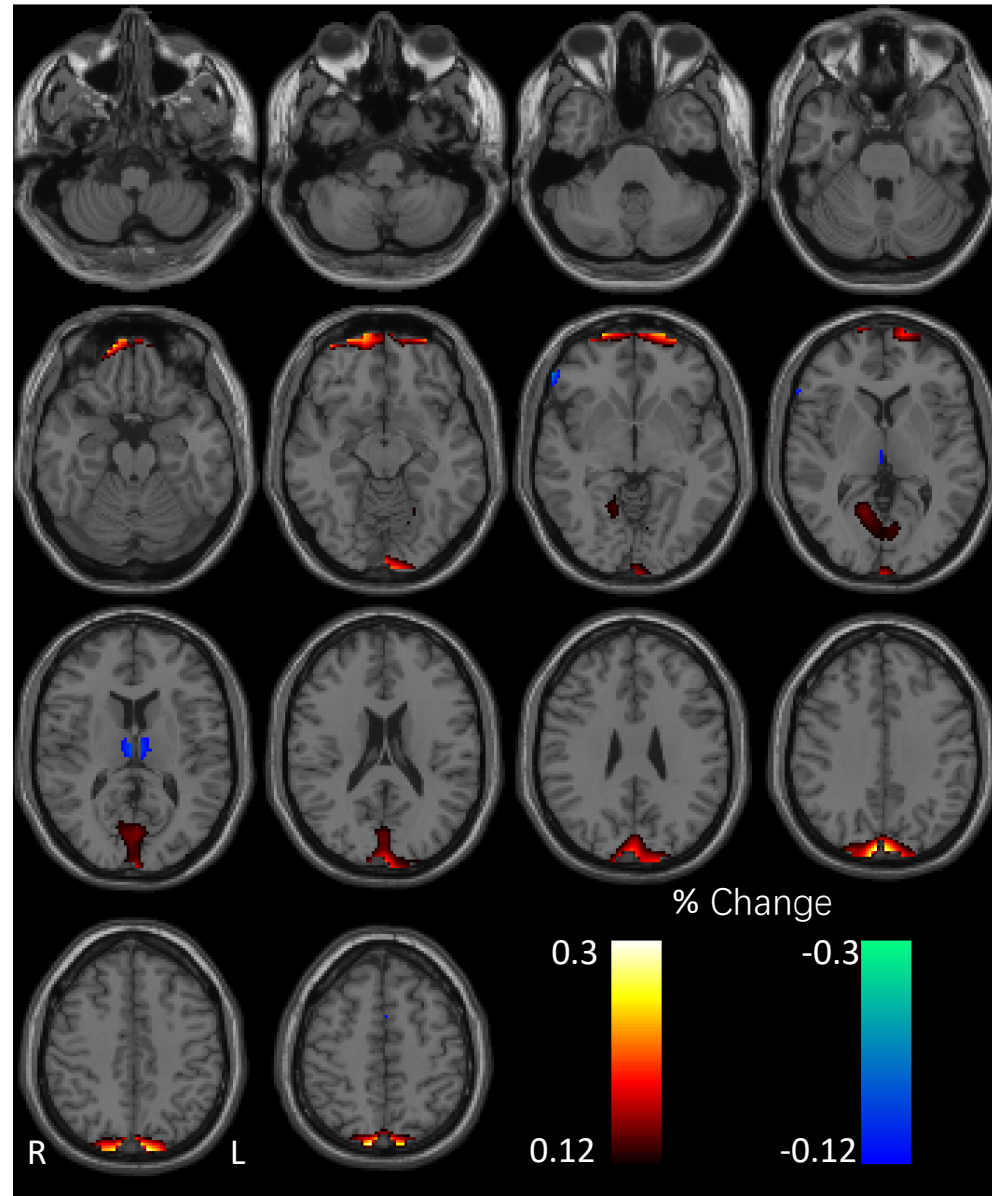

Rong Li et al.,  
2021 *Neuroimage*

46s

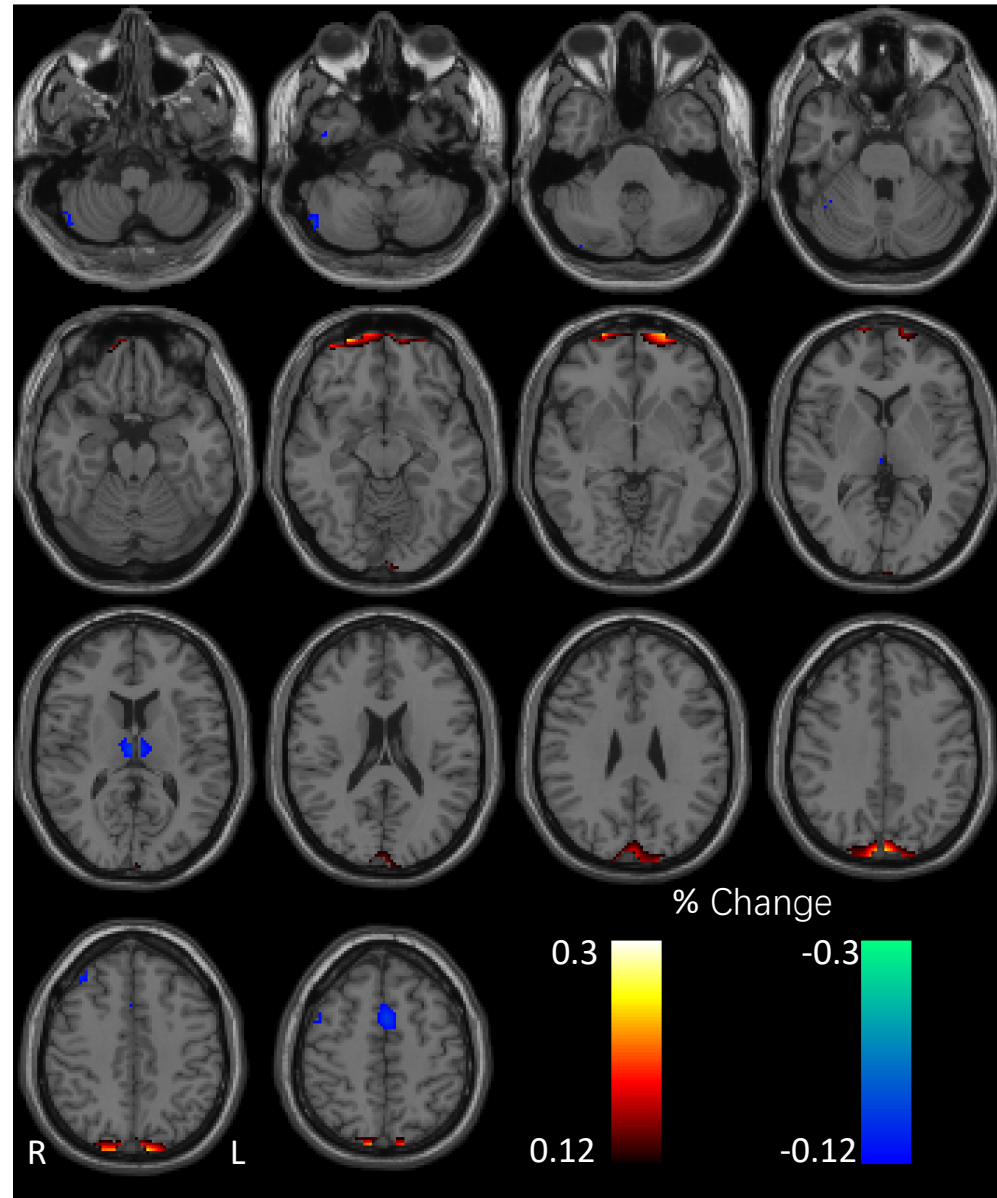

Rong Li et al.,  
2021 *Neuroimage*

47s

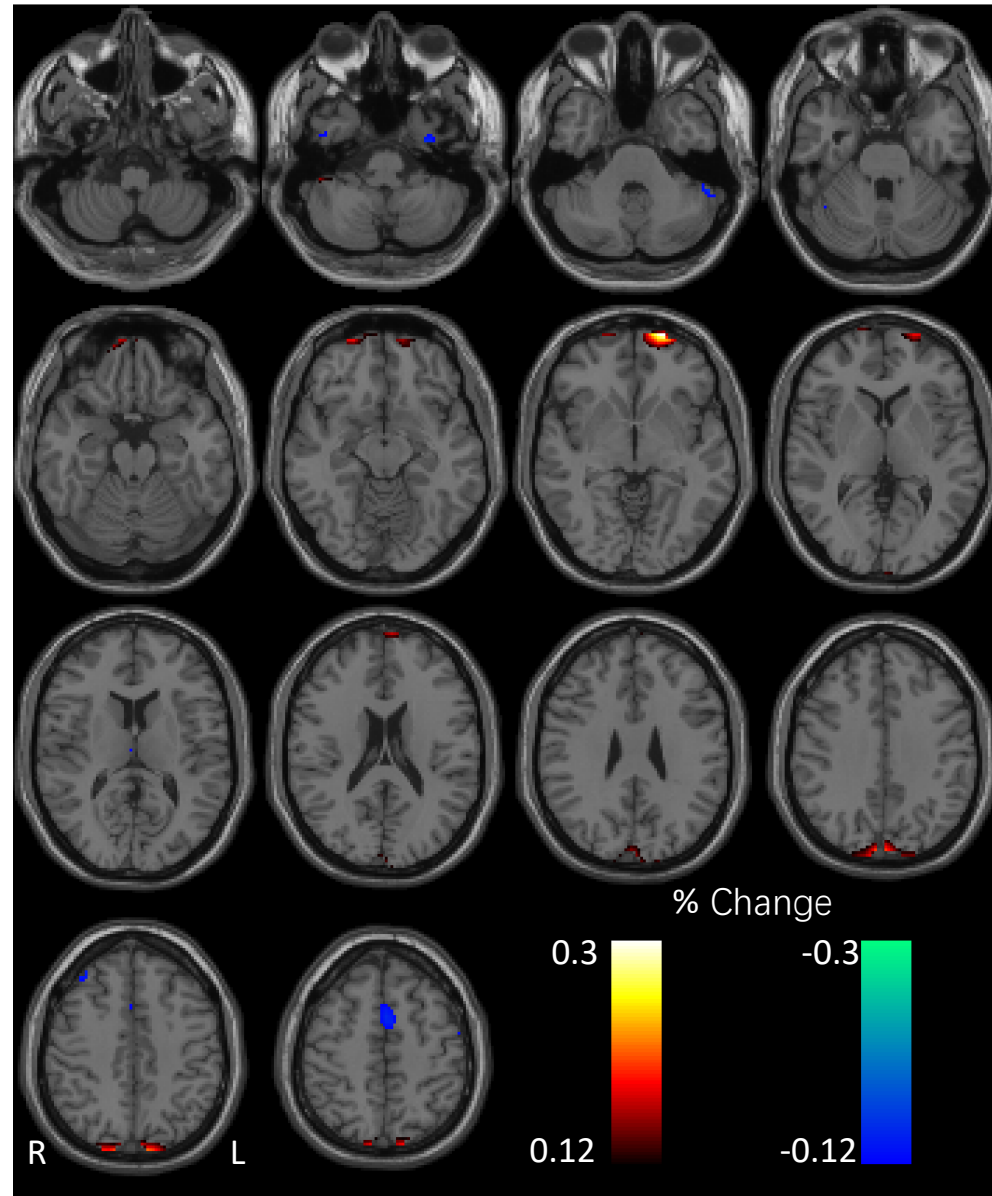

Rong Li et al.,  
2021 *Neuroimage*

48s

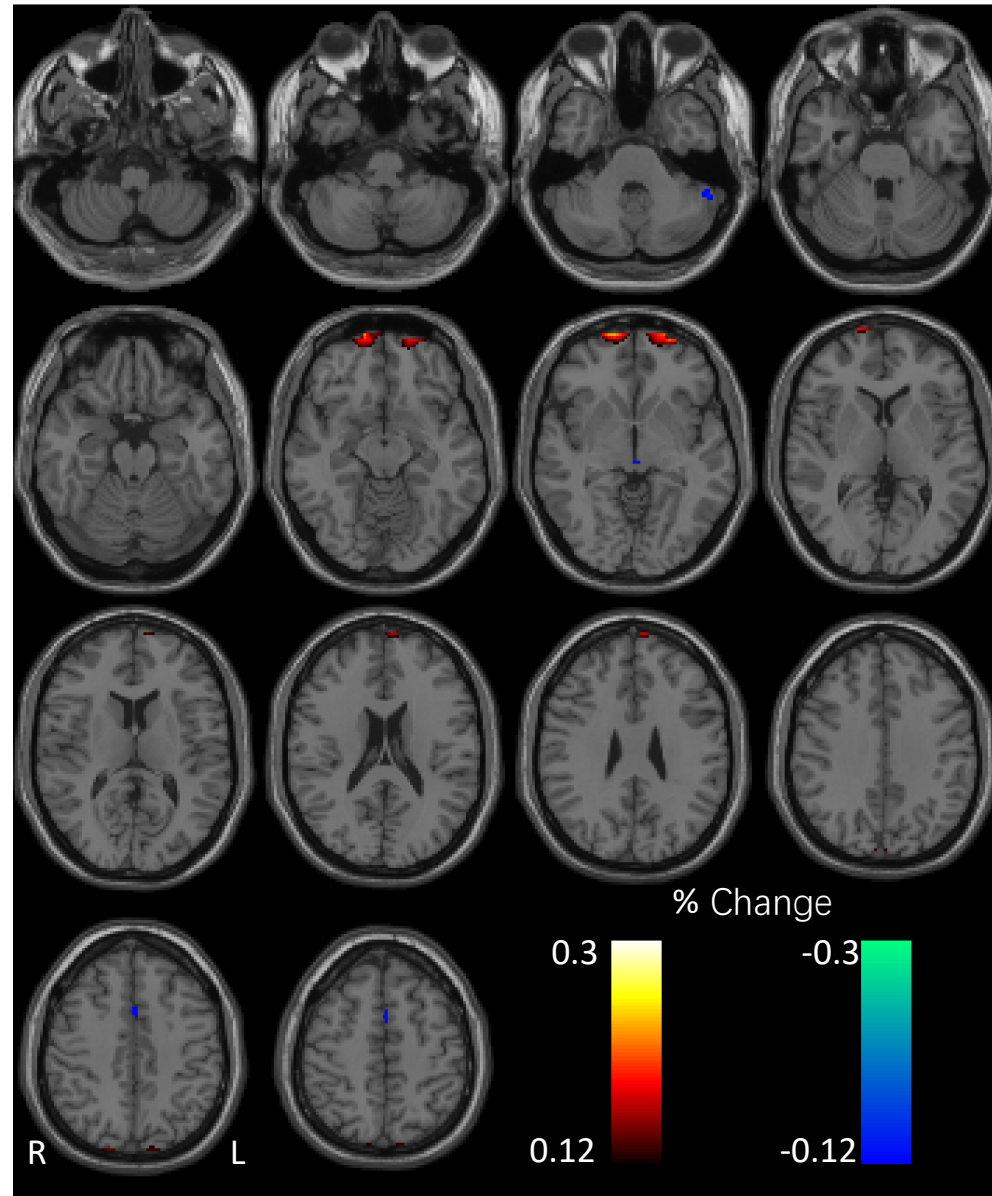

Rong Li et al.,  
2021 *Neuroimage*



49s

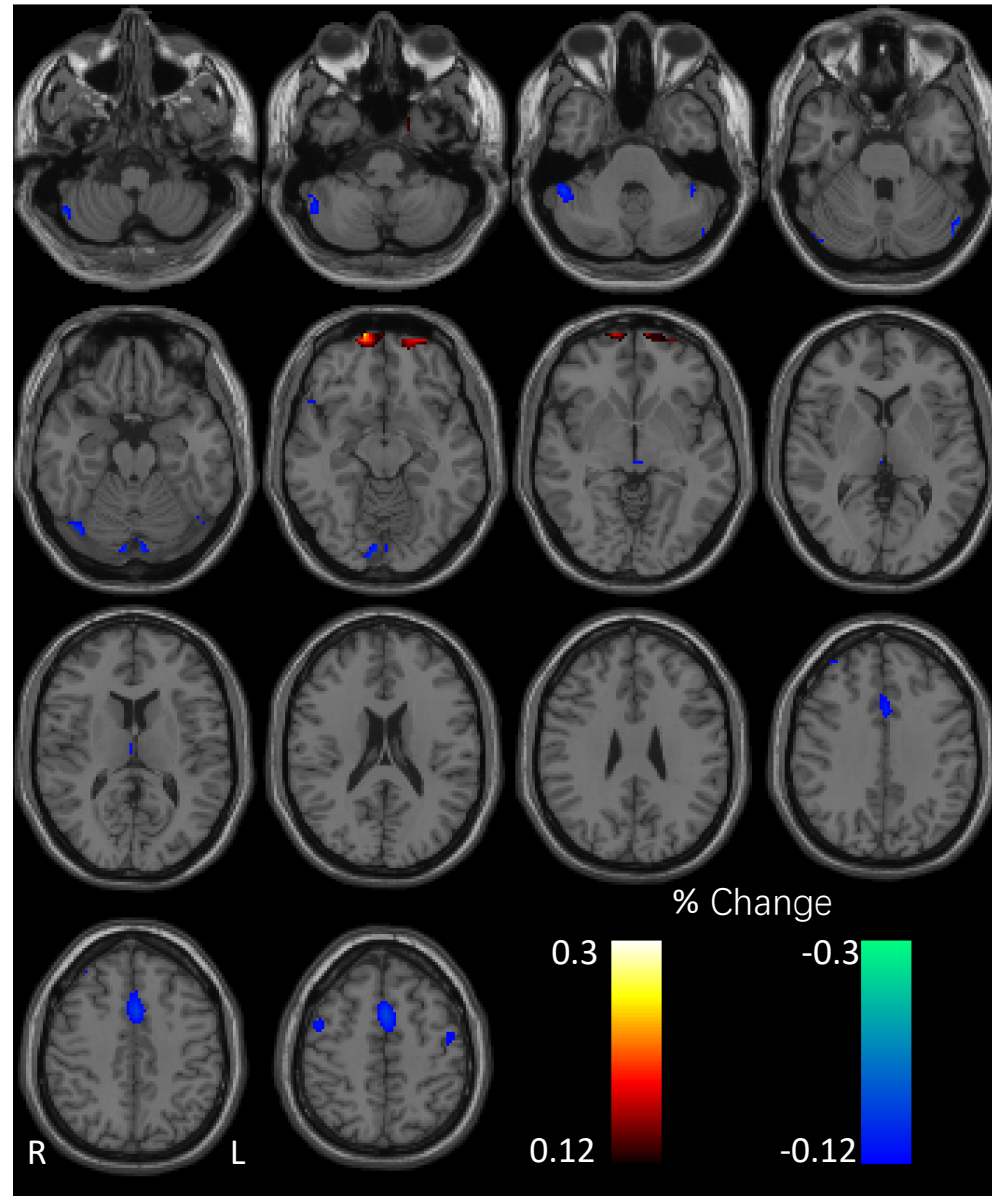

Rong Li et al.,  
2021 *Neuroimage*

50s

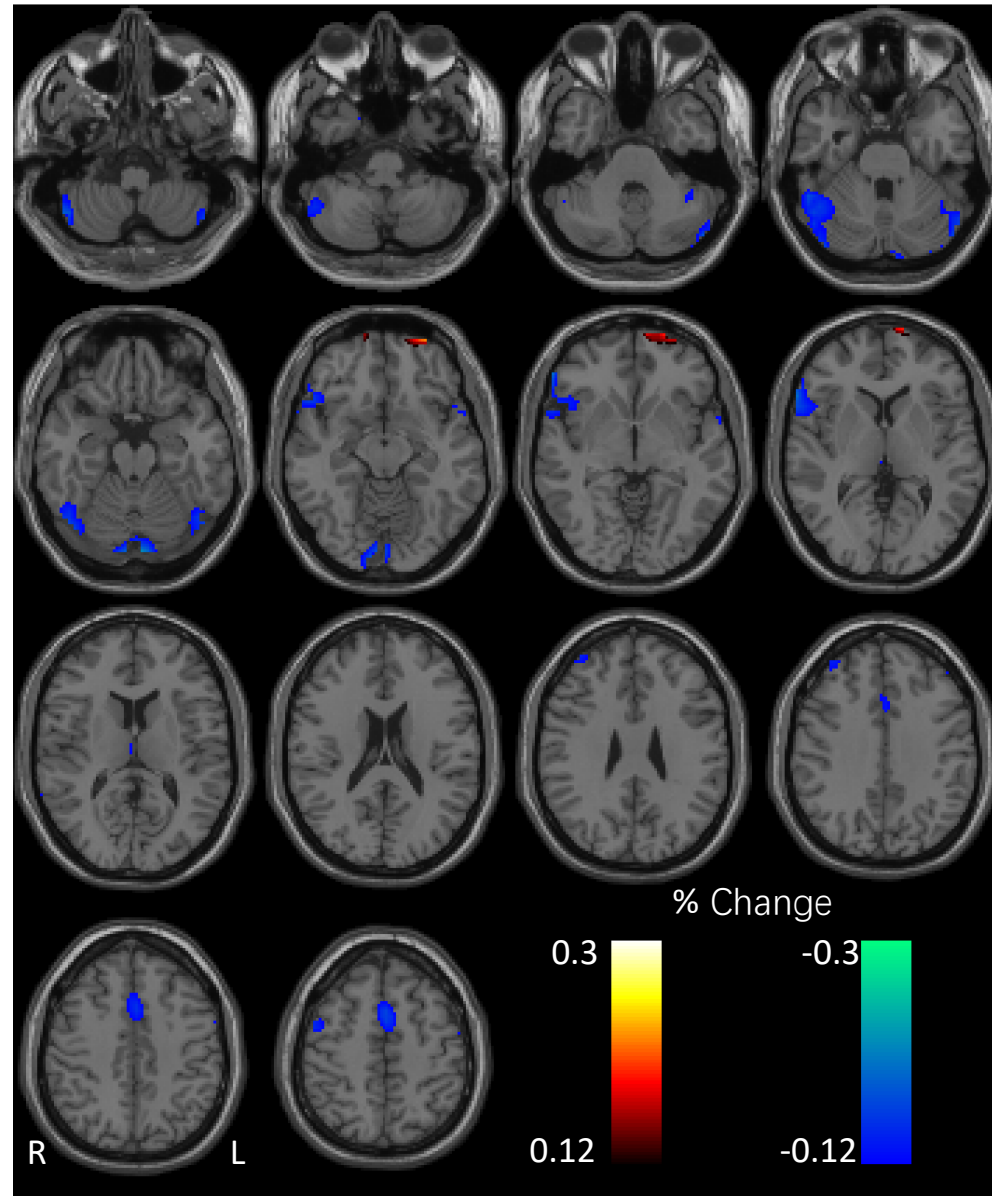

Rong Li et al.,  
2021 *Neuroimage*

51s

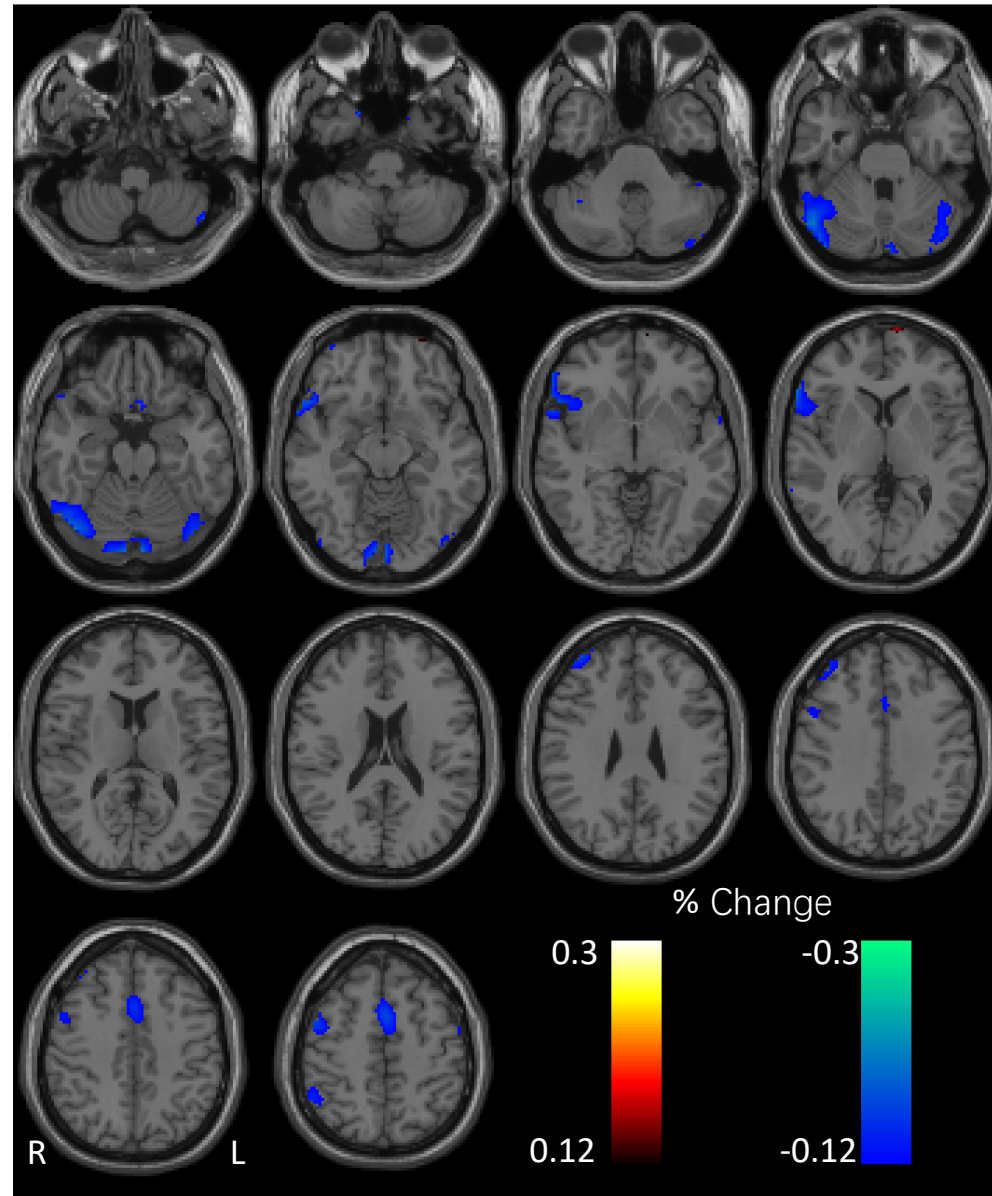

Rong Li et al.,  
2021 *Neuroimage*

52s

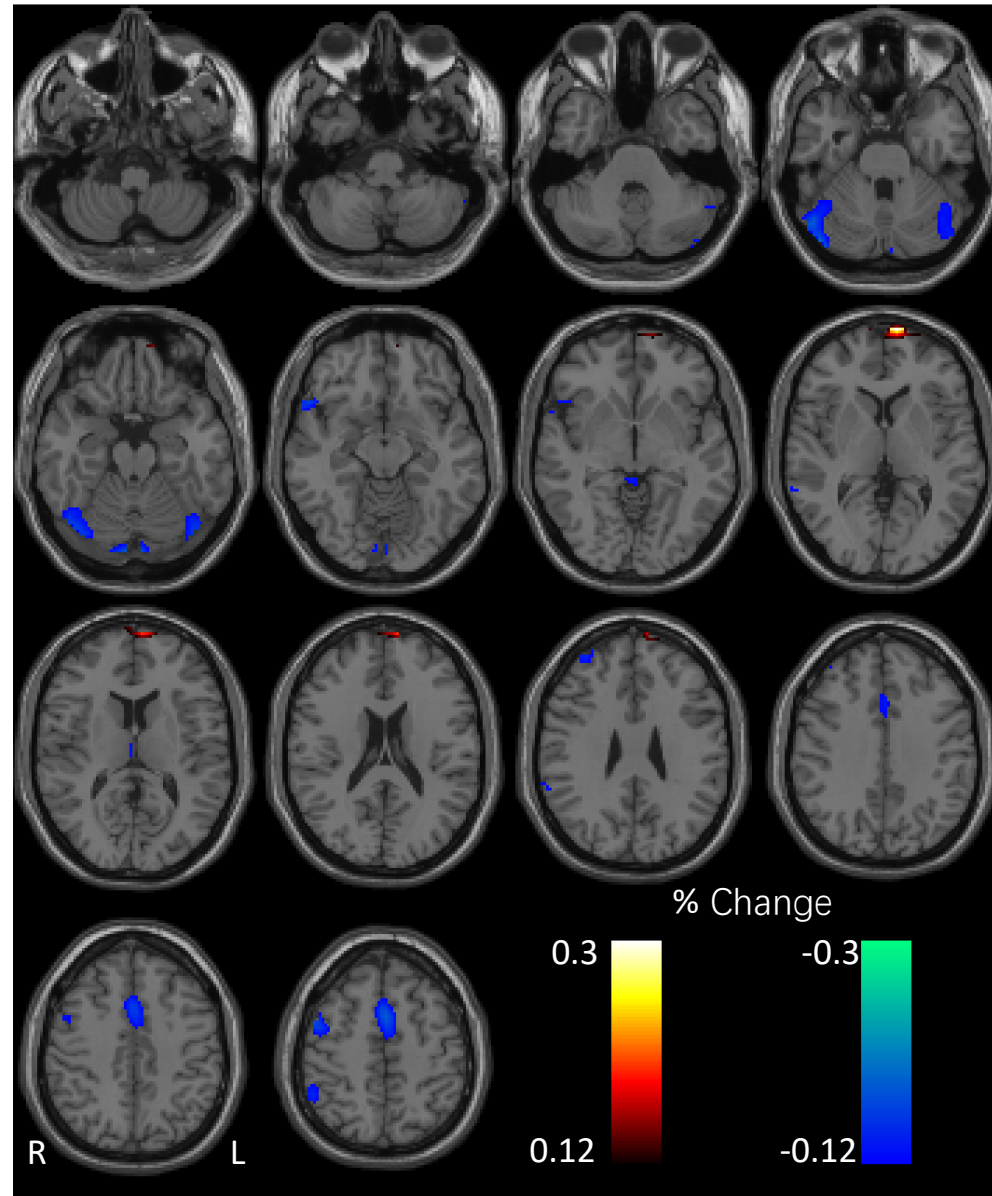

Rong Li et al.,  
2021 *Neuroimage*

53s

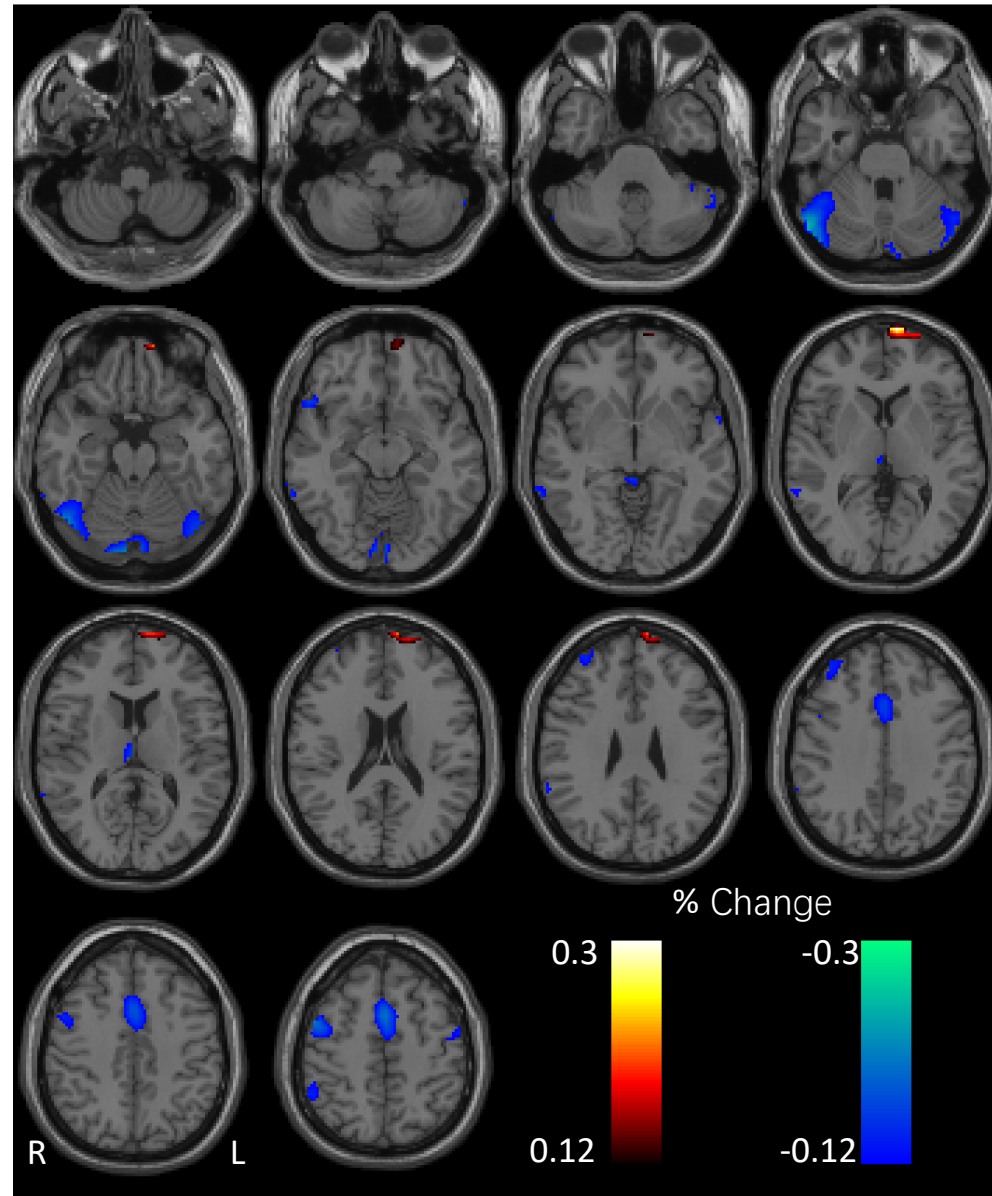

Rong Li et al.,  
2021 *Neuroimage*

54s

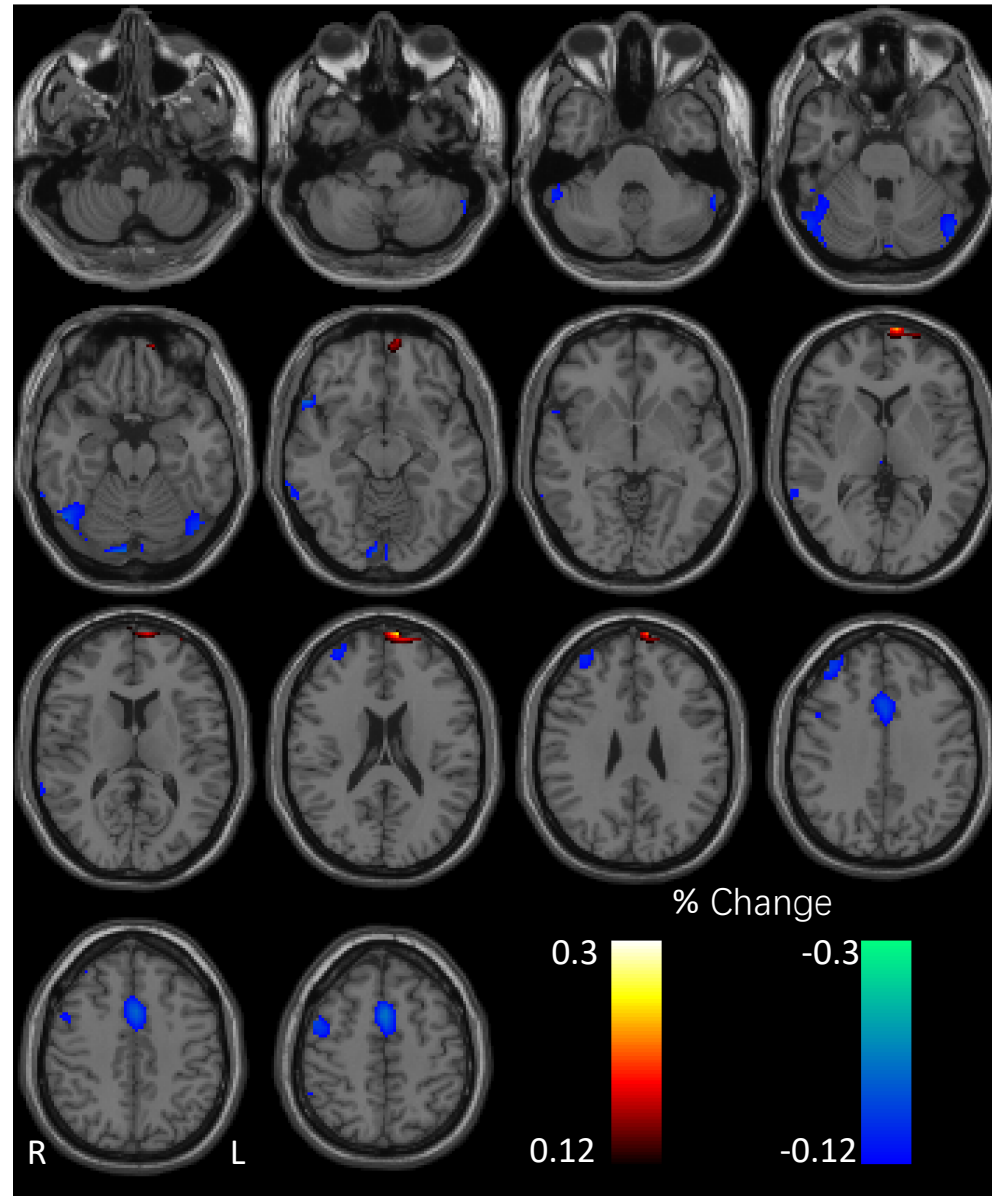

Rong Li et al.,  
2021 *Neuroimage*

55s

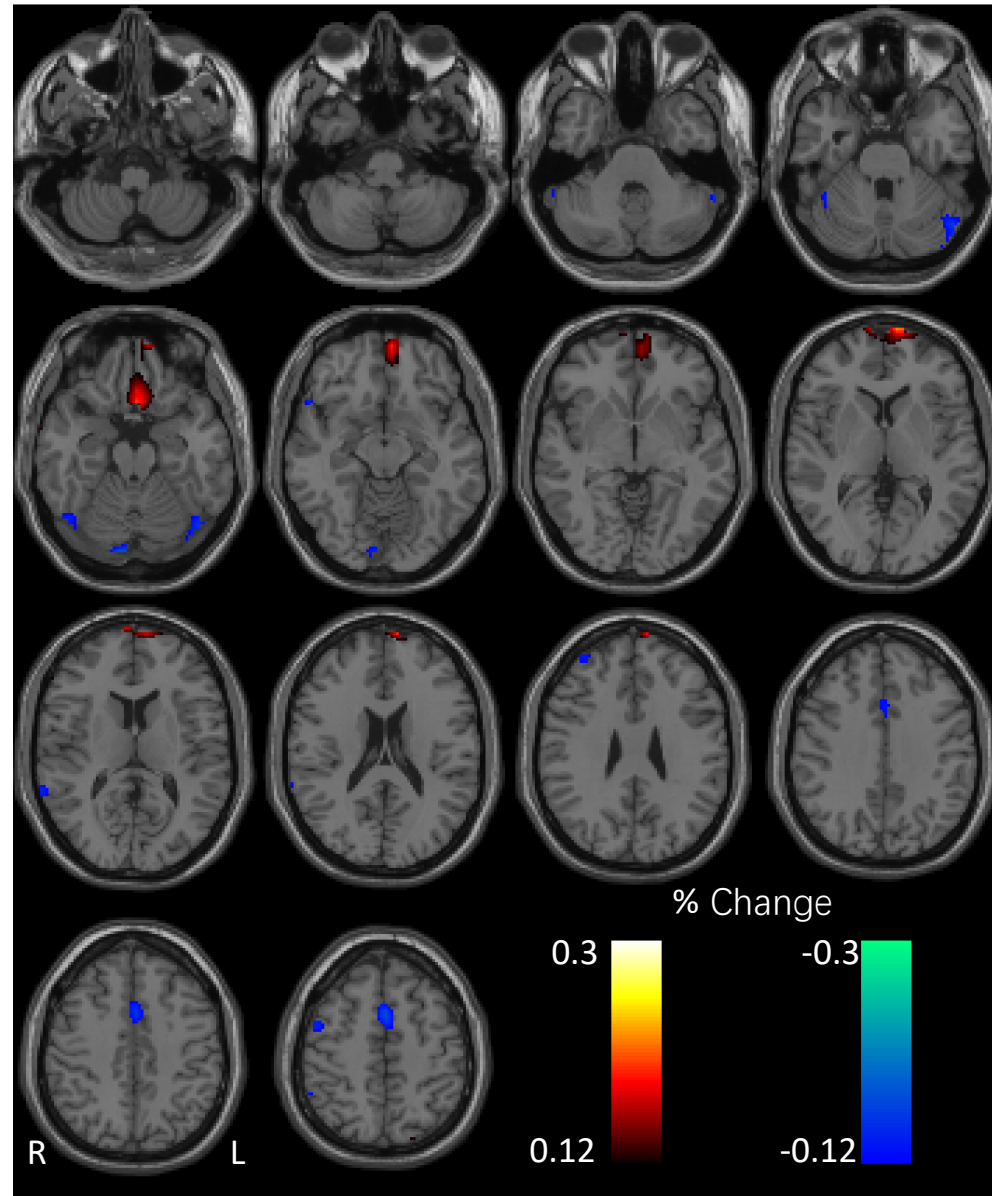

Rong Li et al.,  
2021 *Neuroimage*



56s

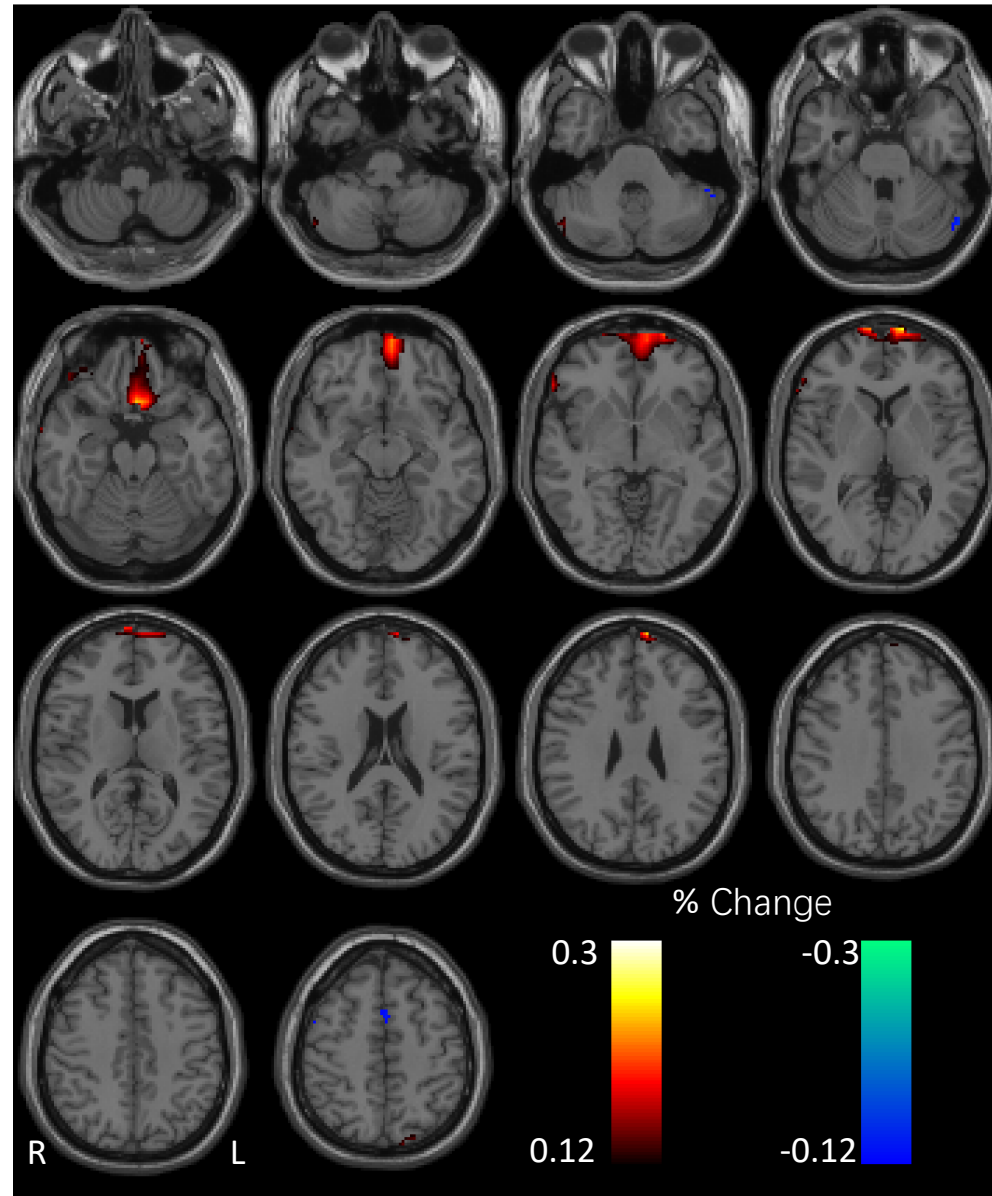

Rong Li et al.,  
2021 *Neuroimage*

57s

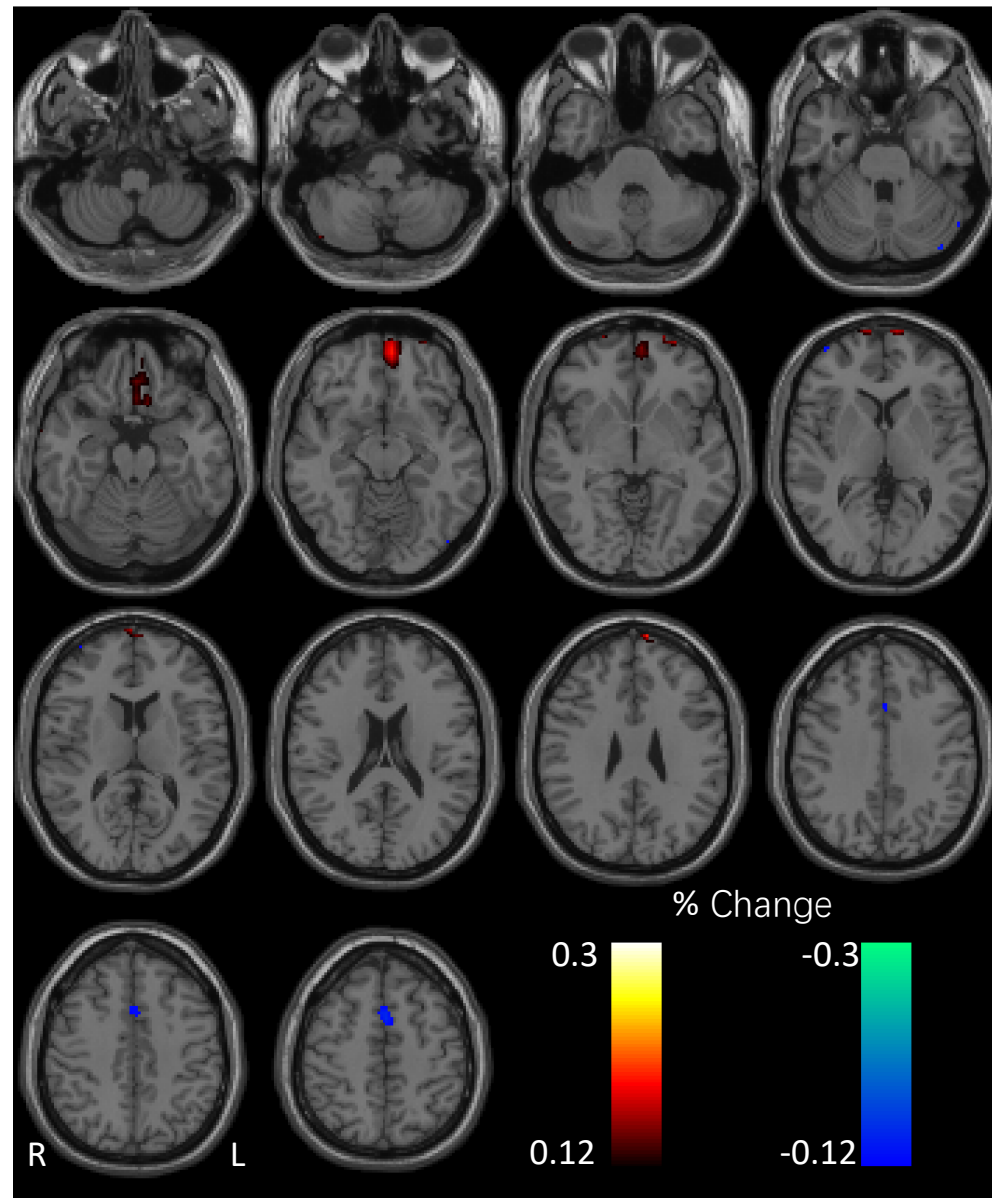

Rong Li et al.,  
2021 *Neuroimage*

58s

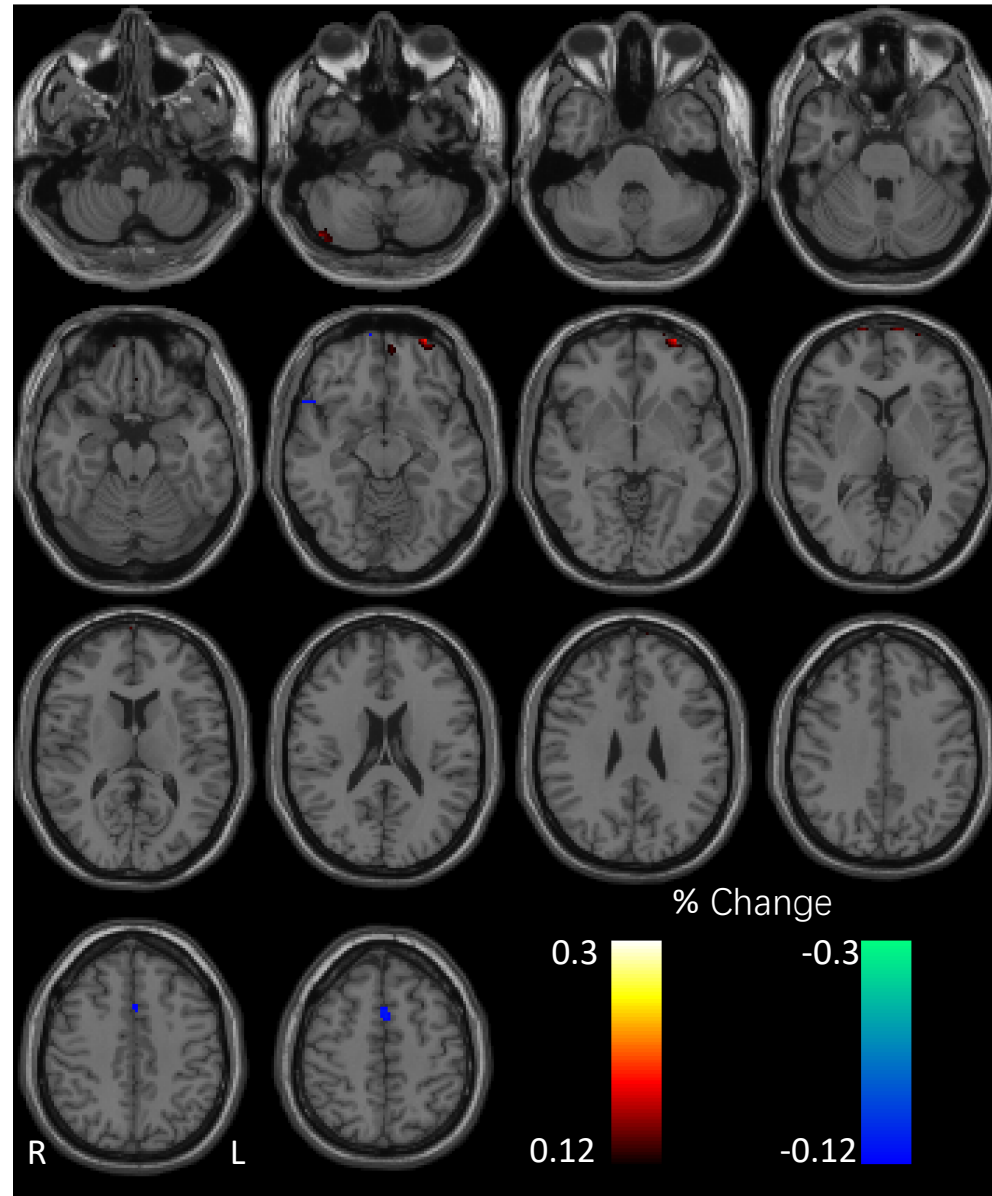

Rong Li et al.,  
2021 *Neuroimage*

59s

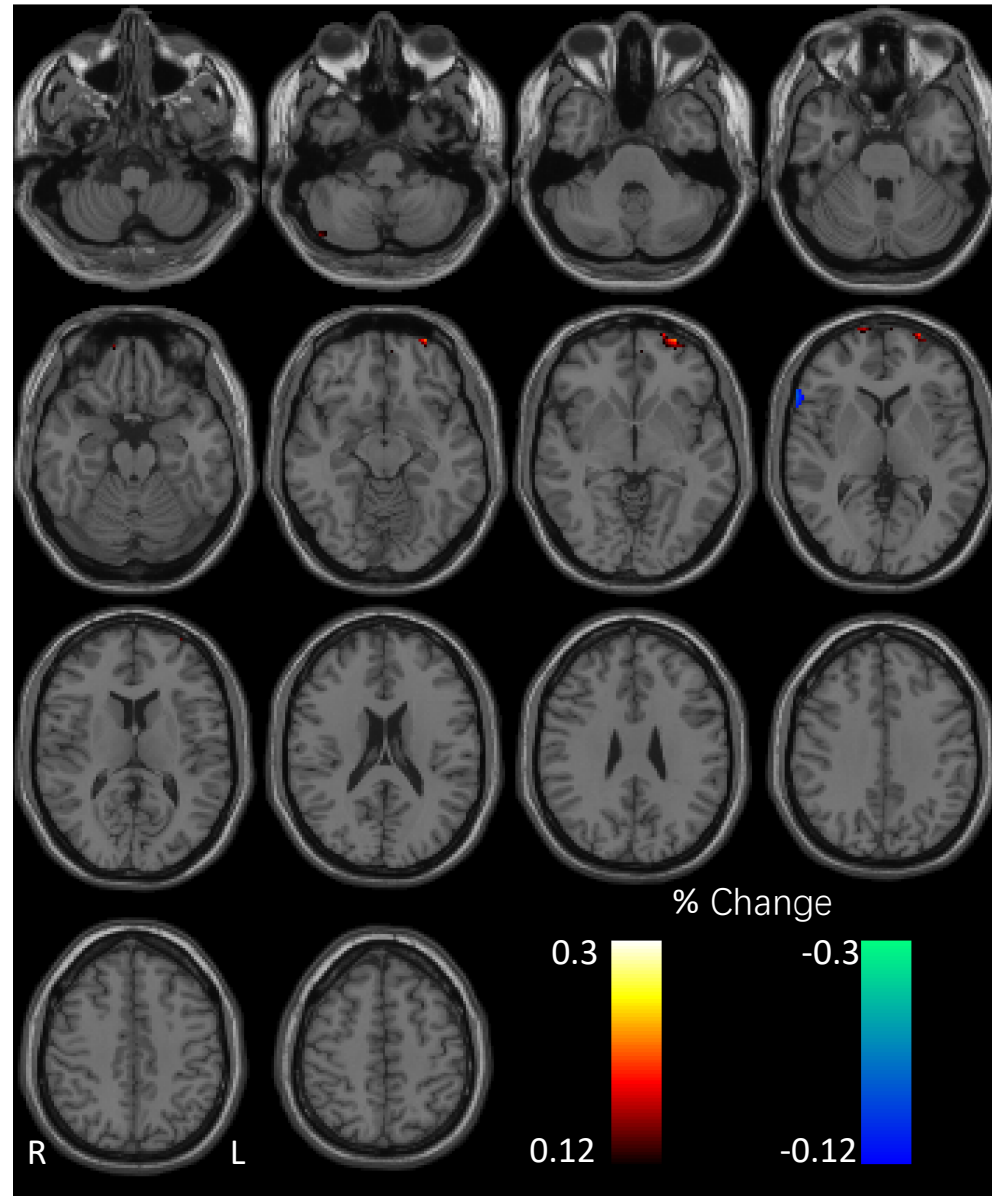

Rong Li et al.,  
2021 *Neuroimage*

60s

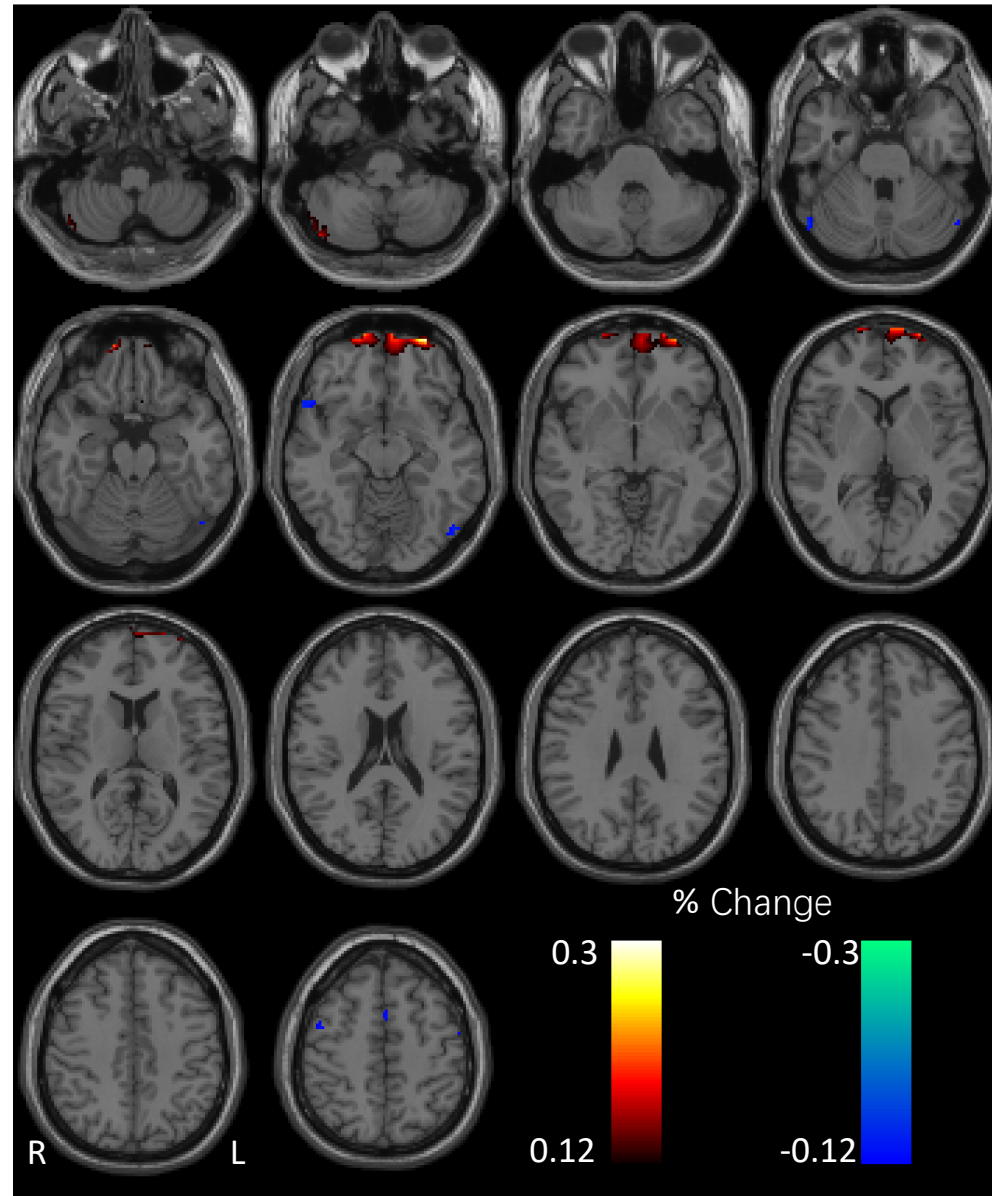

Rong Li et al.,  
2021 *Neuroimage*

61s

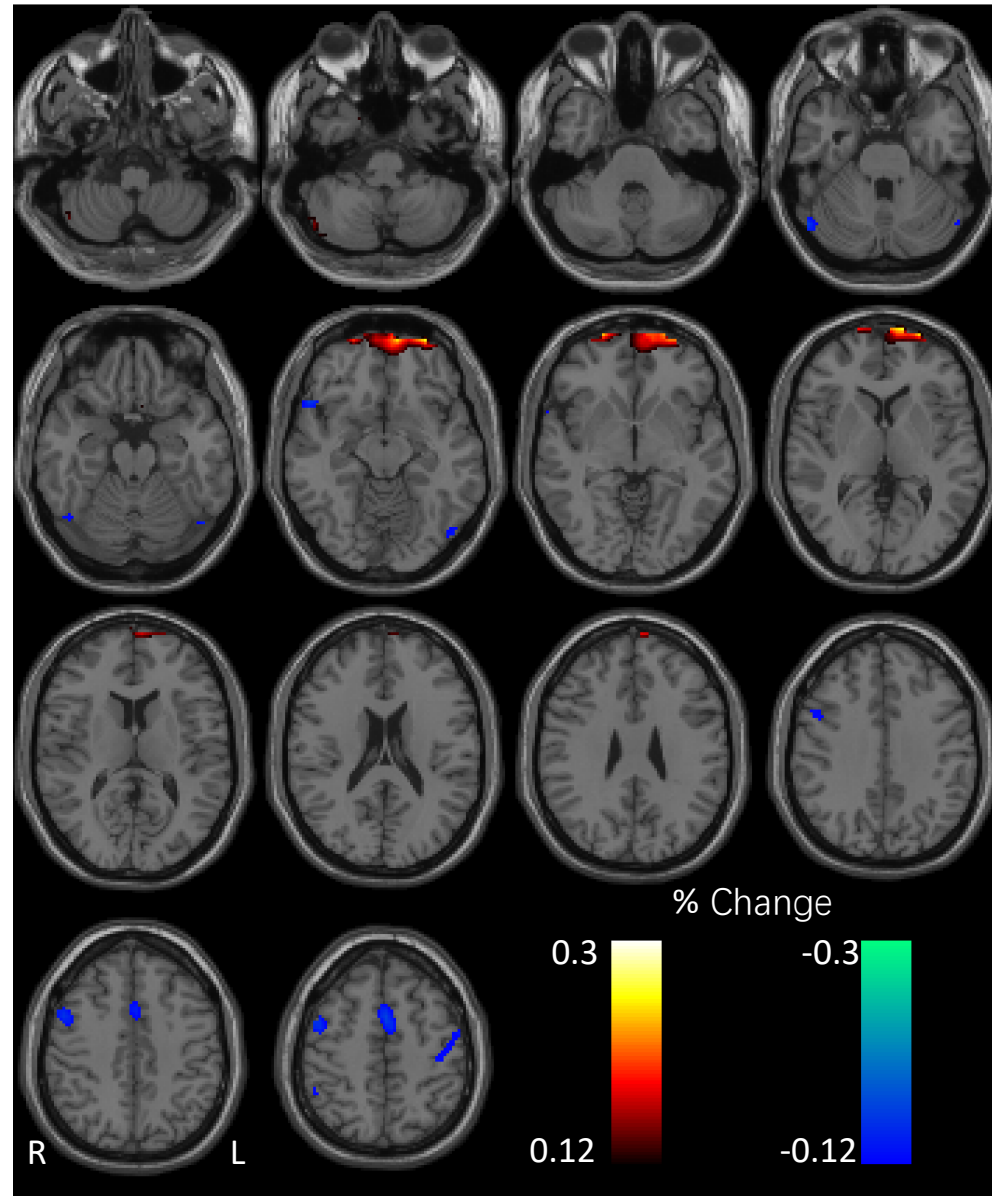

Rong Li et al.,  
2021 *Neuroimage*

62s

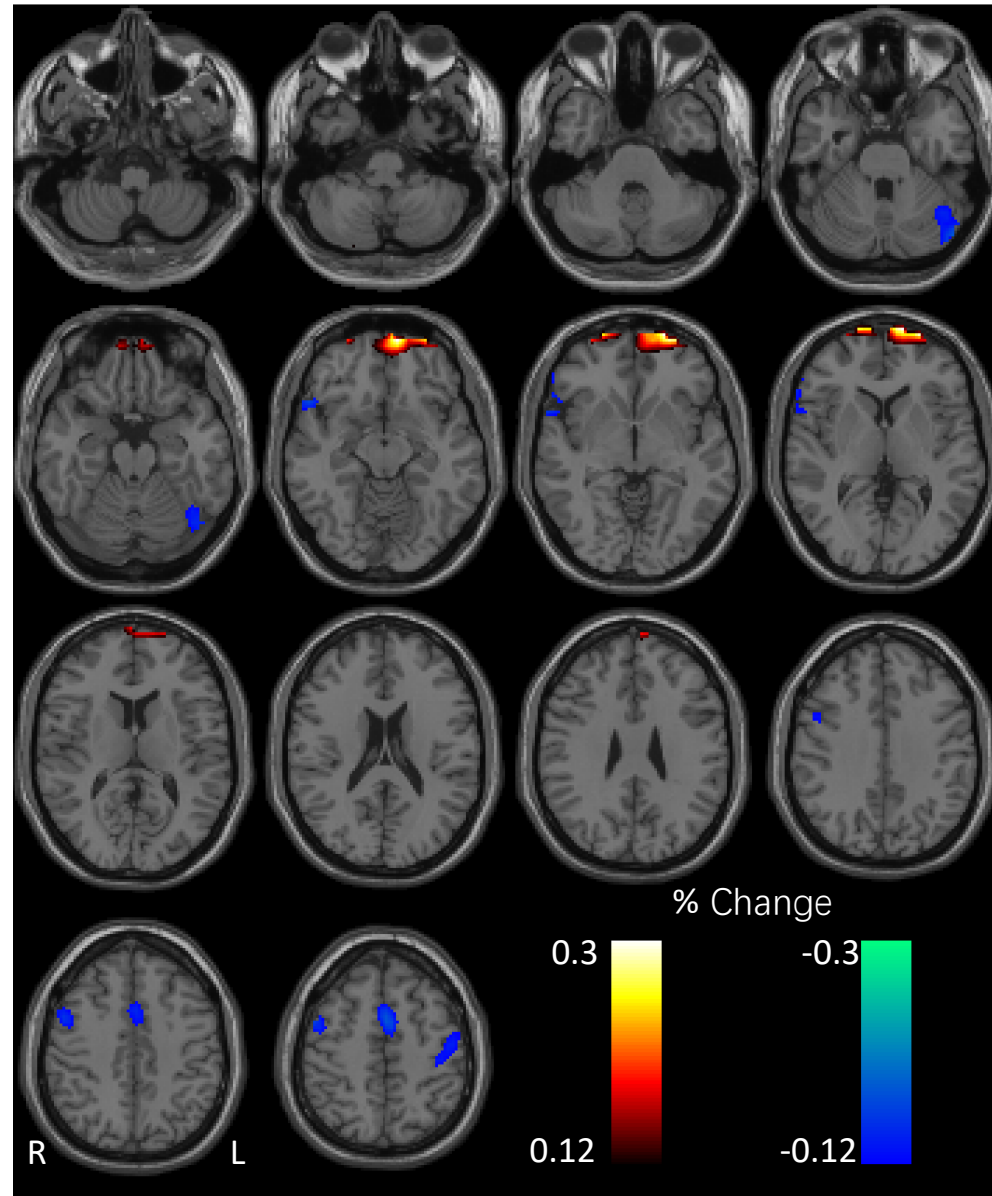

Rong Li et al.,  
2021 *Neuroimage*



63s

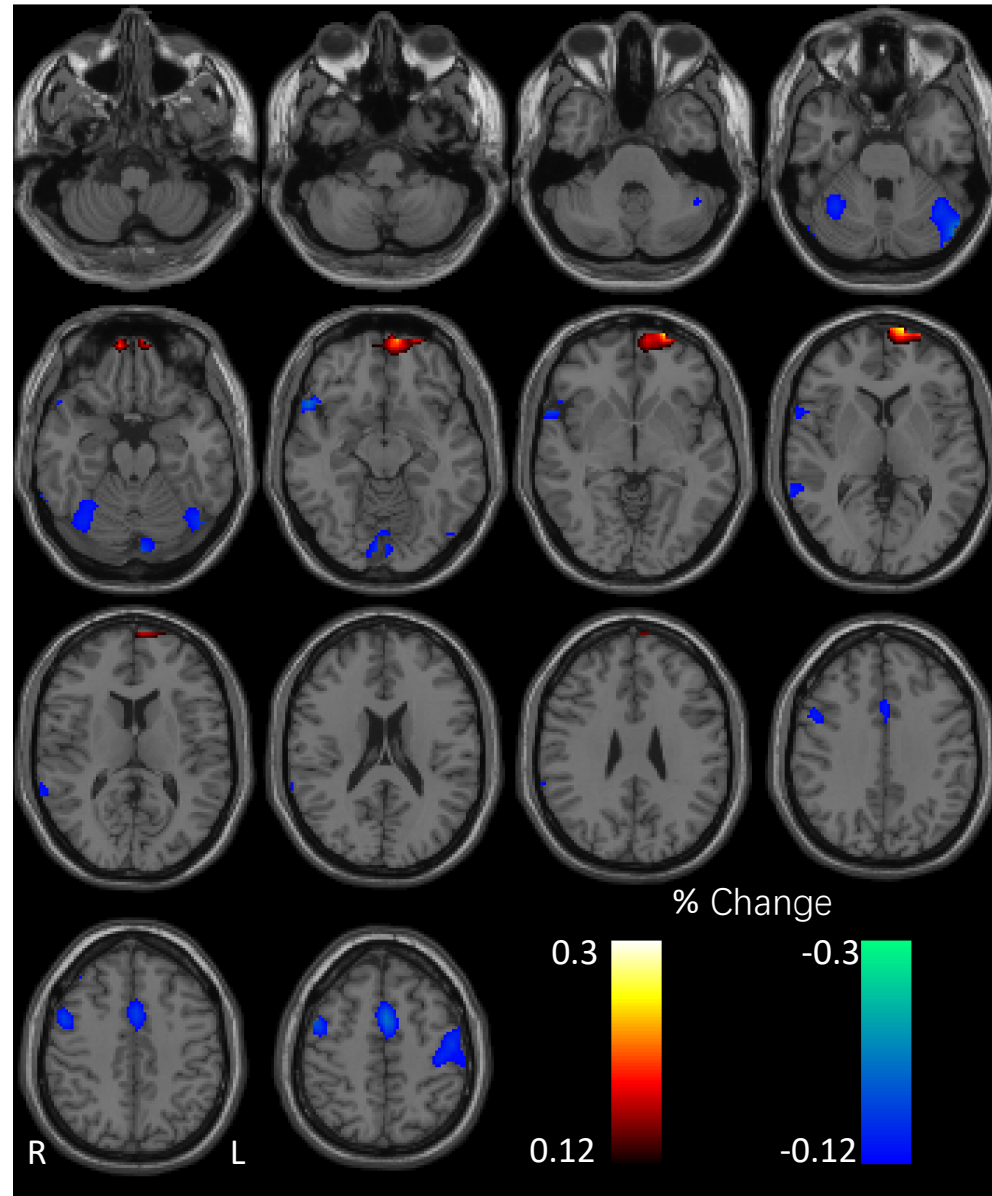

Rong Li et al.,  
2021 *Neuroimage*
