# Supplementary material
Source: PubMed Central journal article supplement (PMC8278331)
Supplement: NIHMS1711270-supplement-SM3.pdf [file NIHMS1711270-supplement-SM3.pdf]

# Gambling task Percent Change Maps

The times denote seconds after task onset, task offset occurred at time 28.

0s

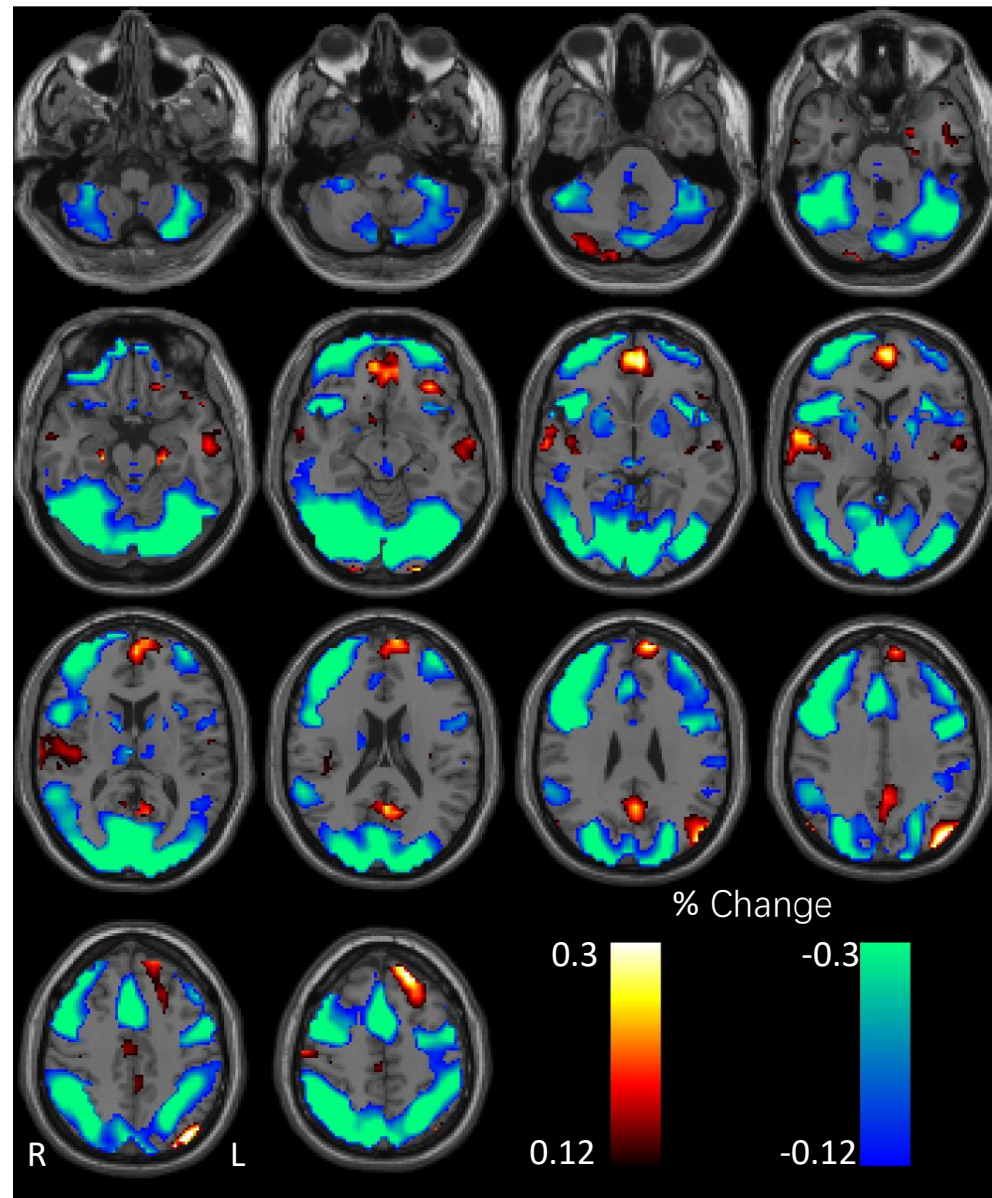

Rong Li et al.,  
2021 *Neuroimage*

1s

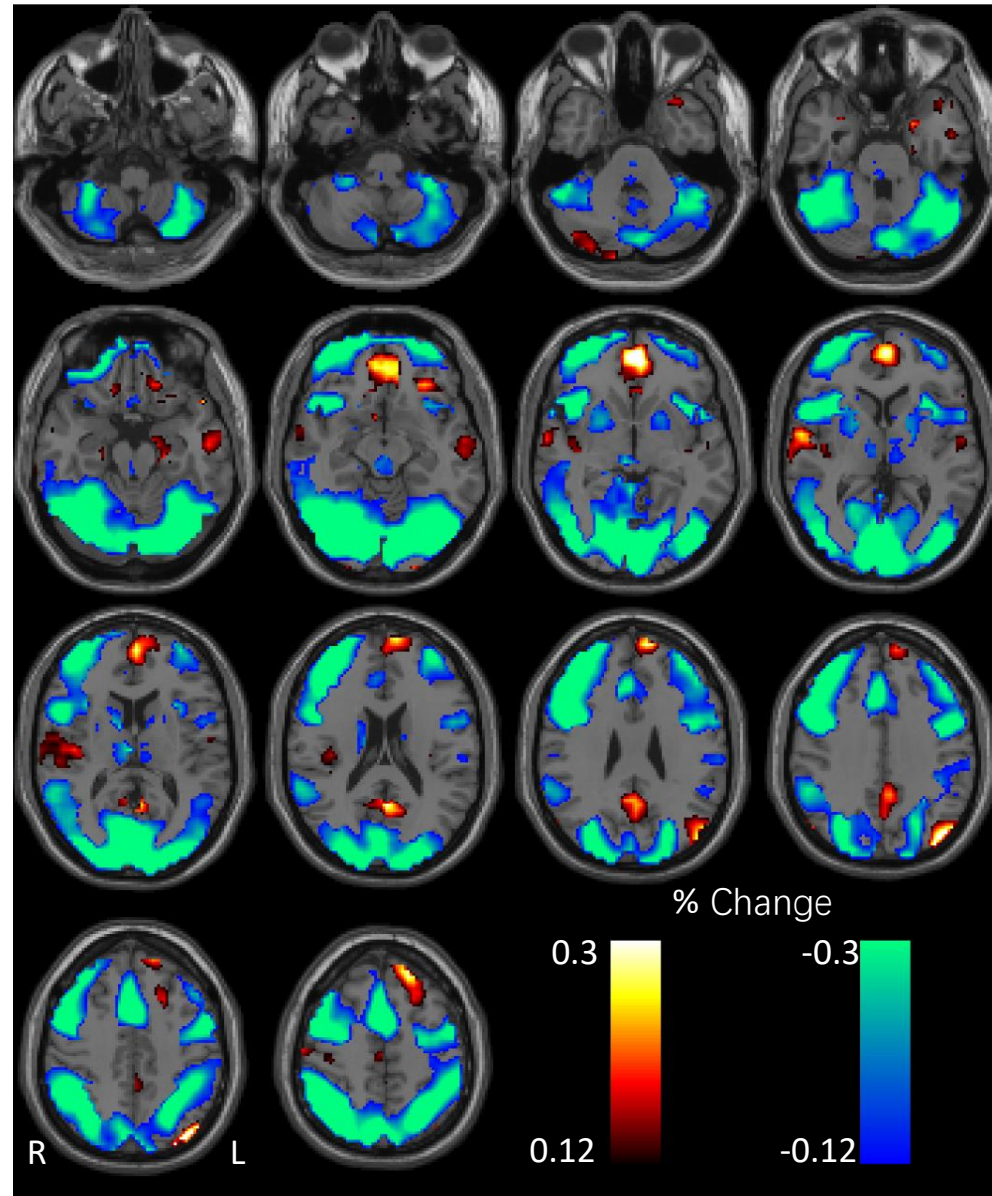

Rong Li et al.,  
2021 *Neuroimage*

2s

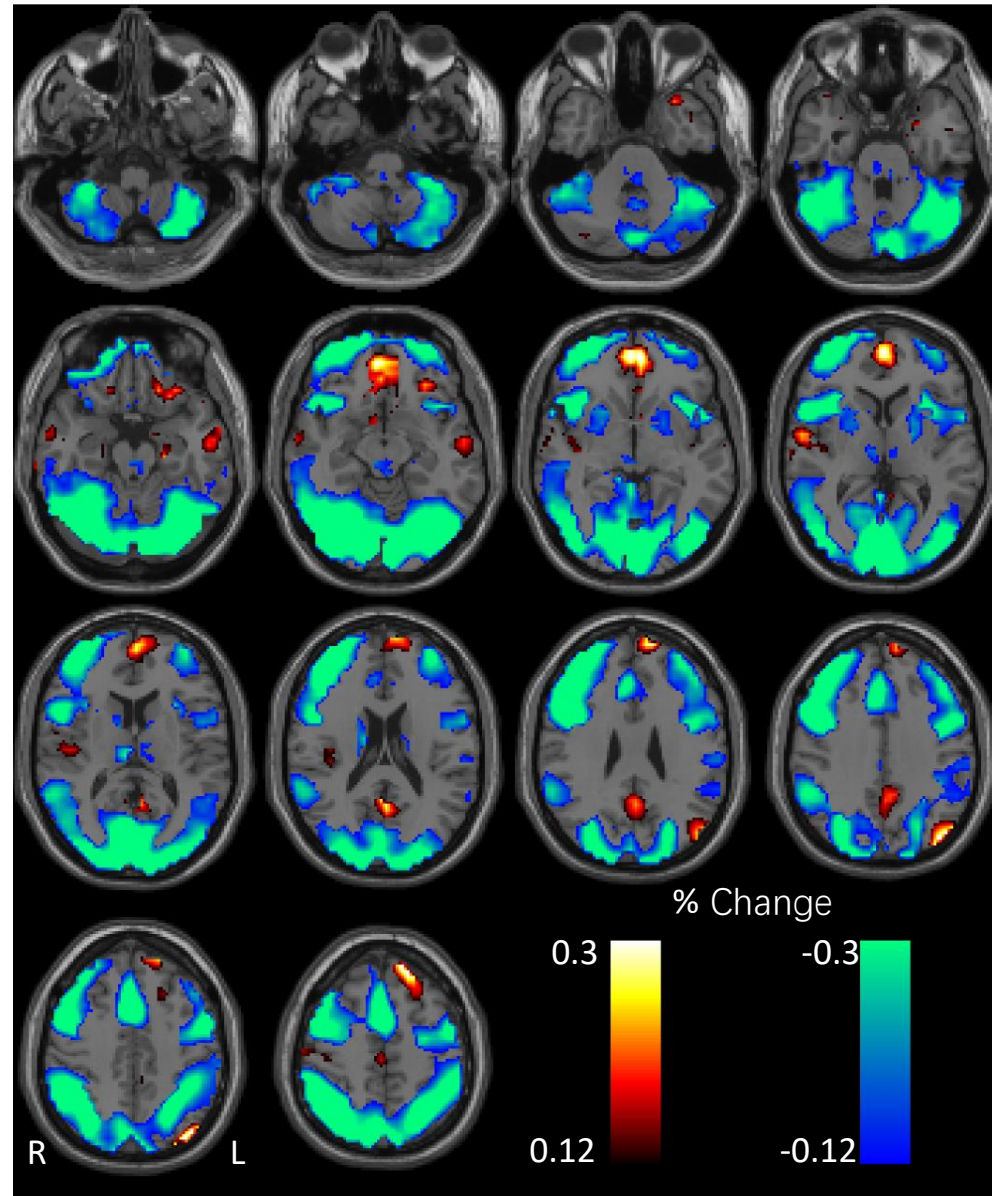

Rong Li et al.,  
2021 *Neuroimage*



3s

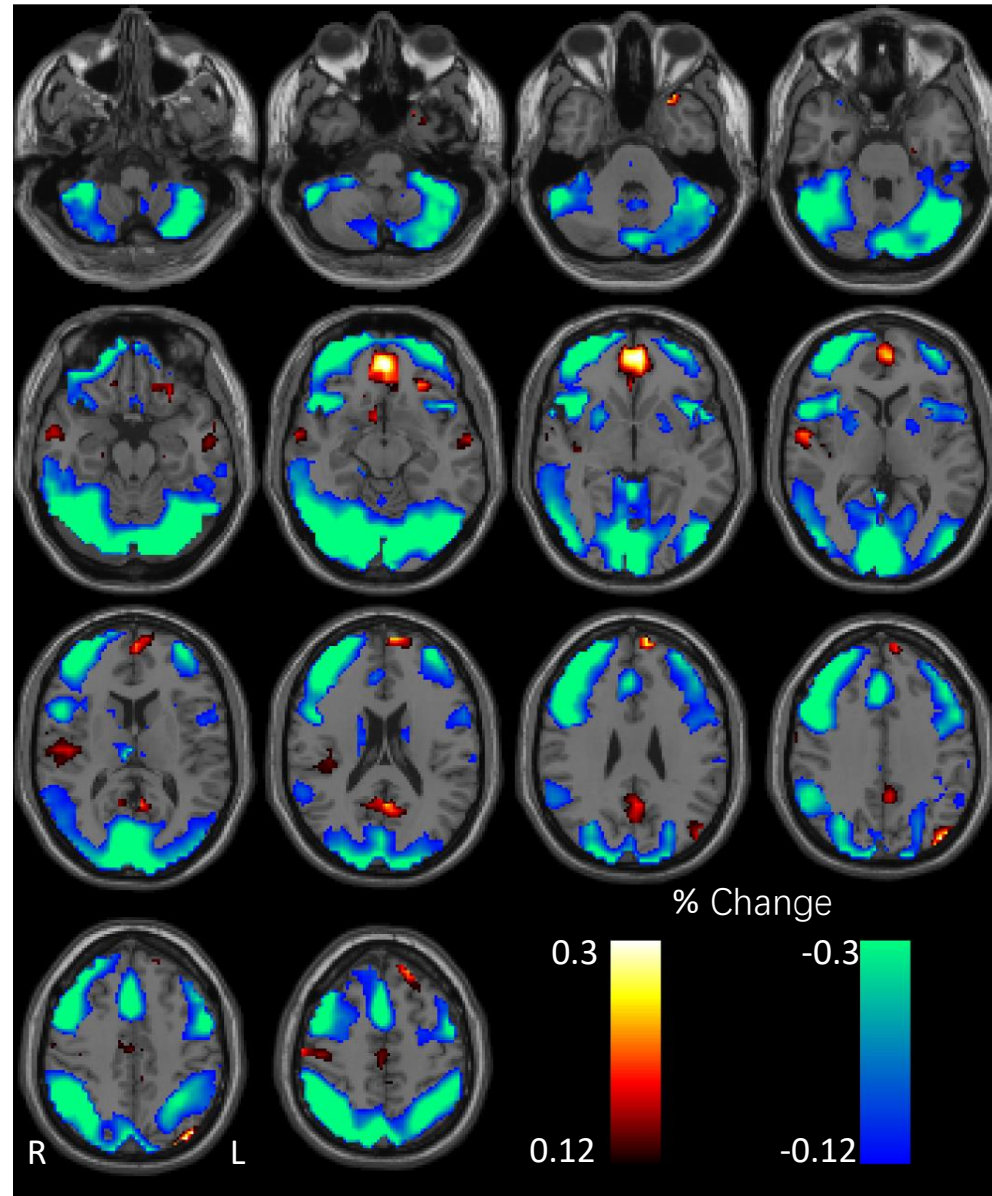

Rong Li et al.,  
2021 *Neuroimage*

4s

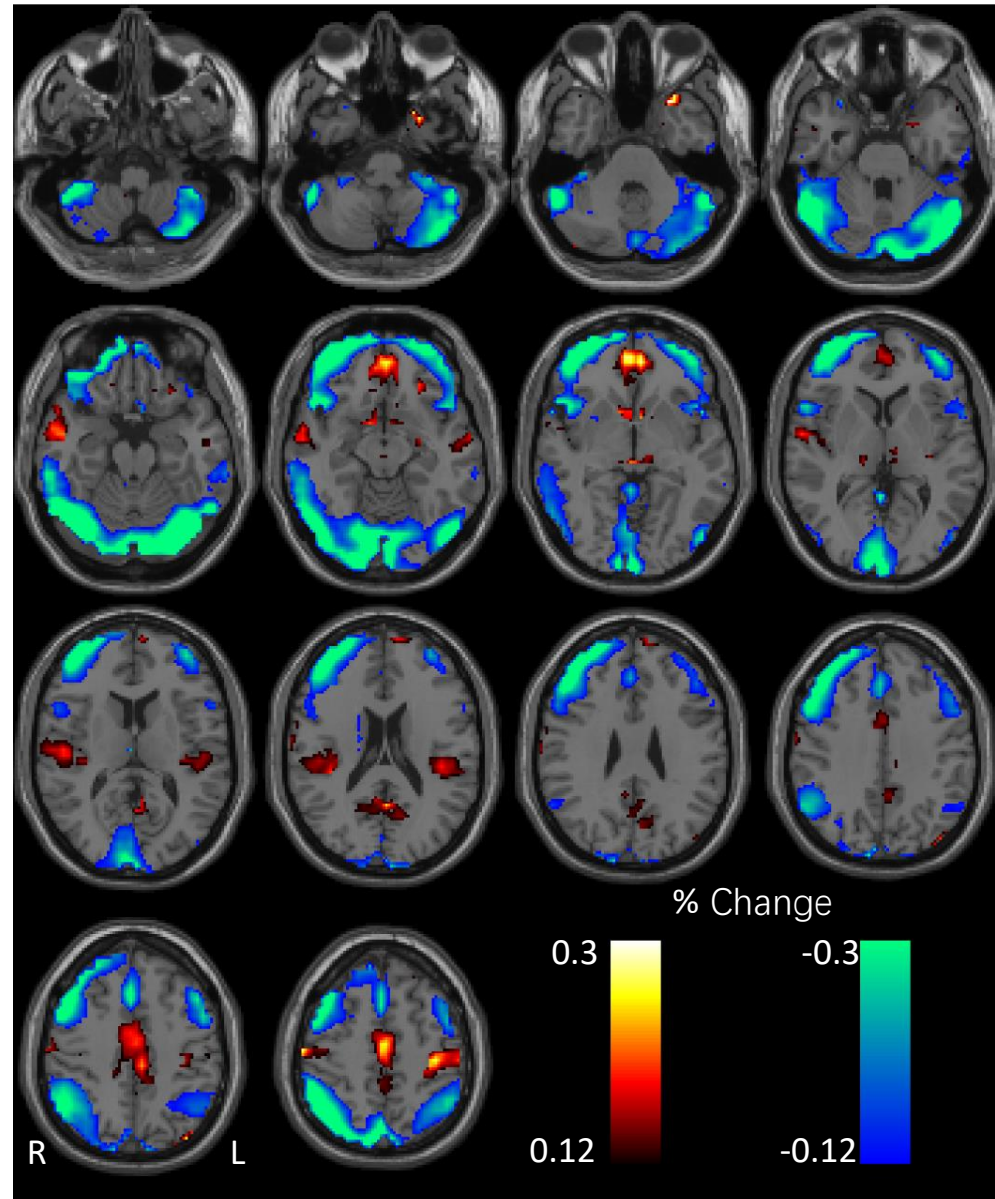

Rong Li et al.,  
2021 *Neuroimage*

5s

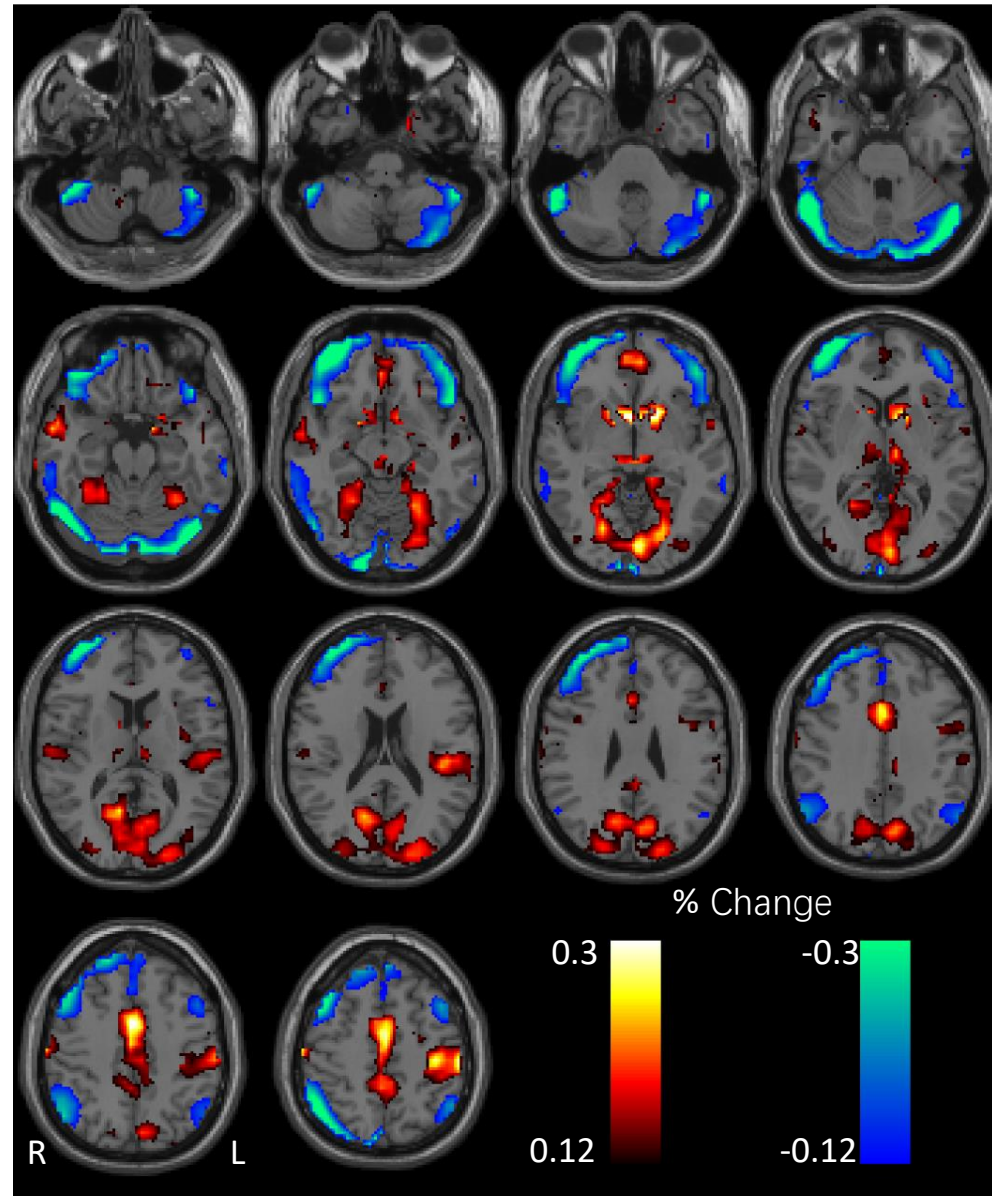

Rong Li et al.,  
2021 *Neuroimage*



6s

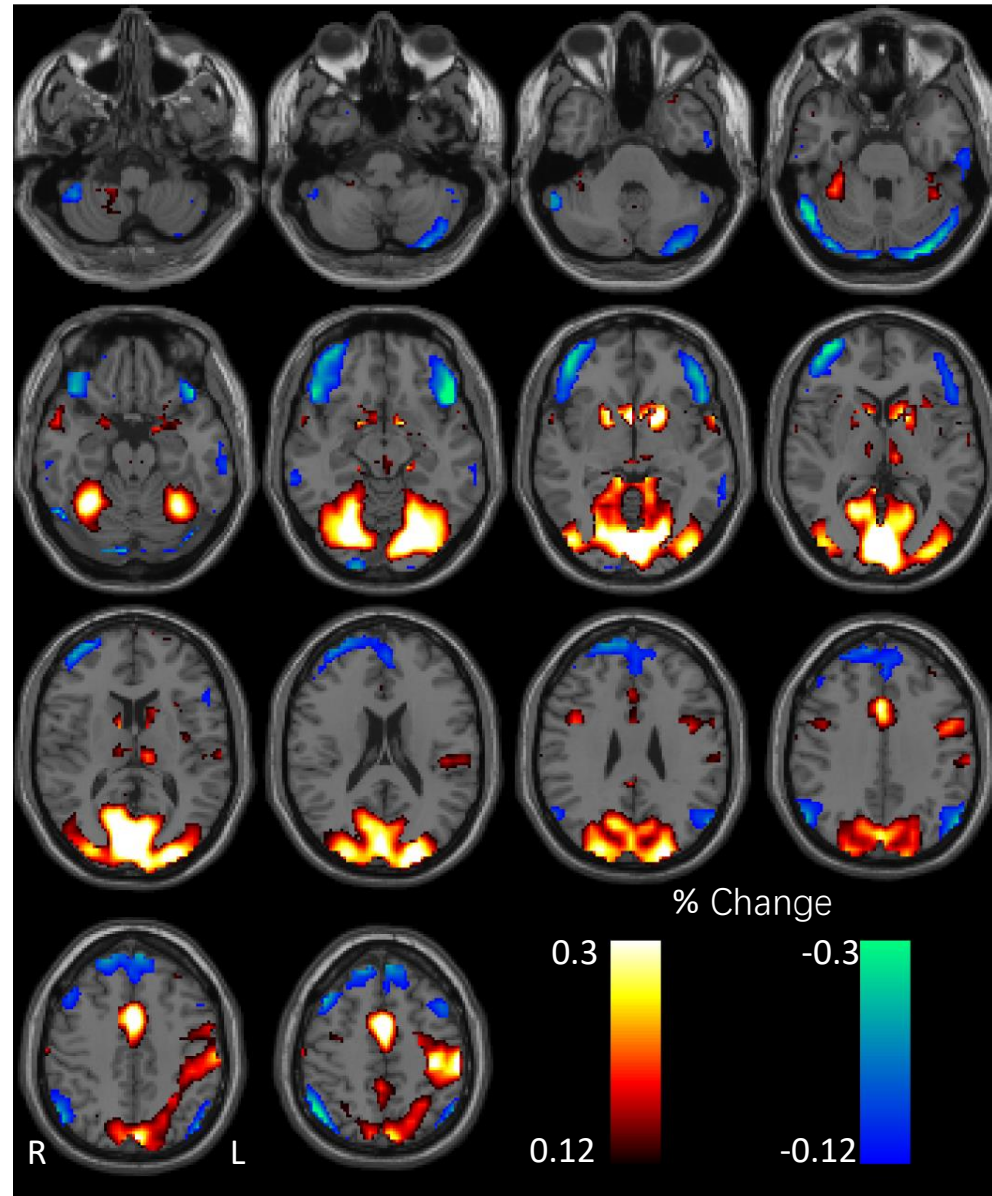

Rong Li et al.,  
2021 *Neuroimage*



7s

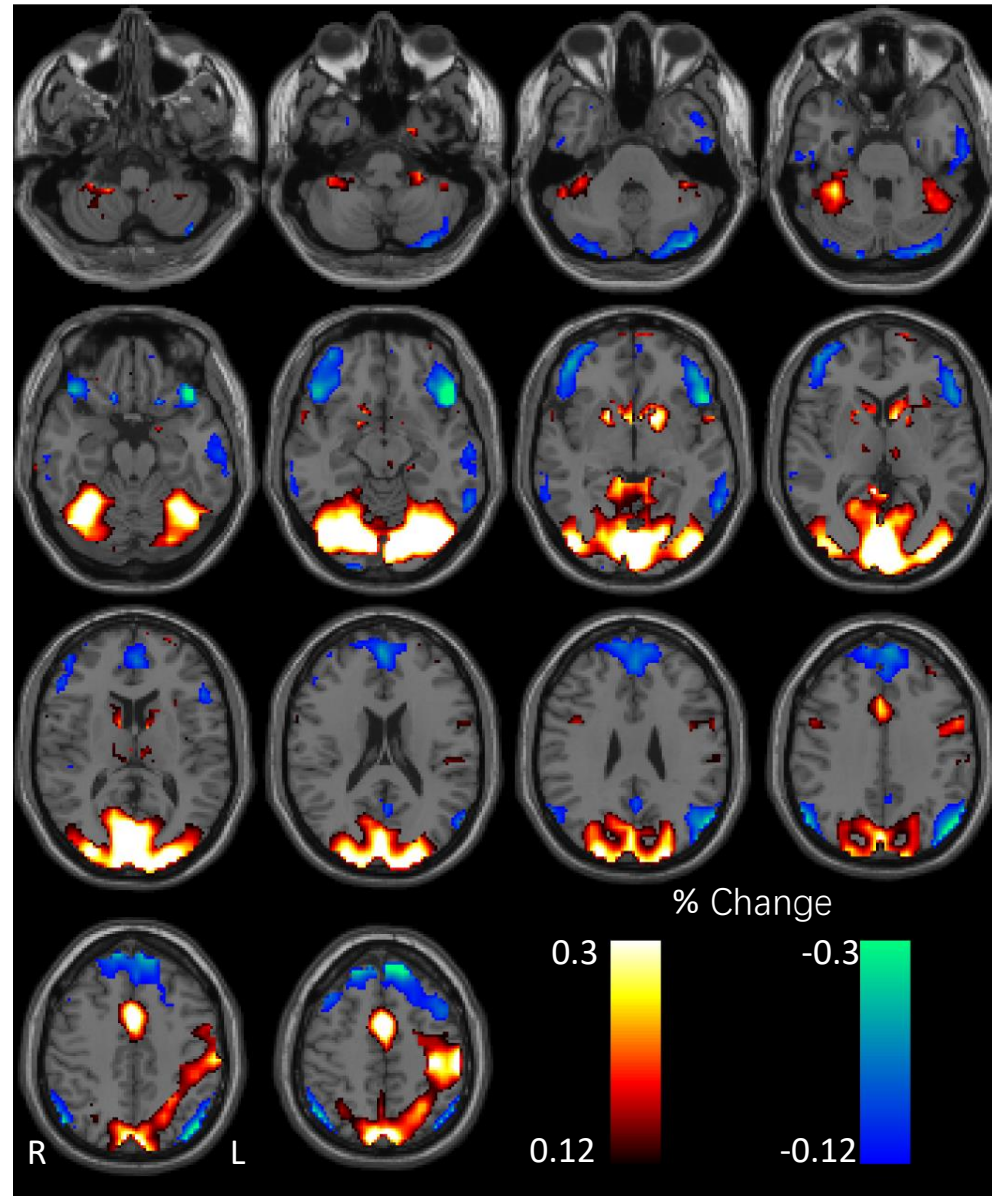

Rong Li et al.,  
2021 *Neuroimage*

8s

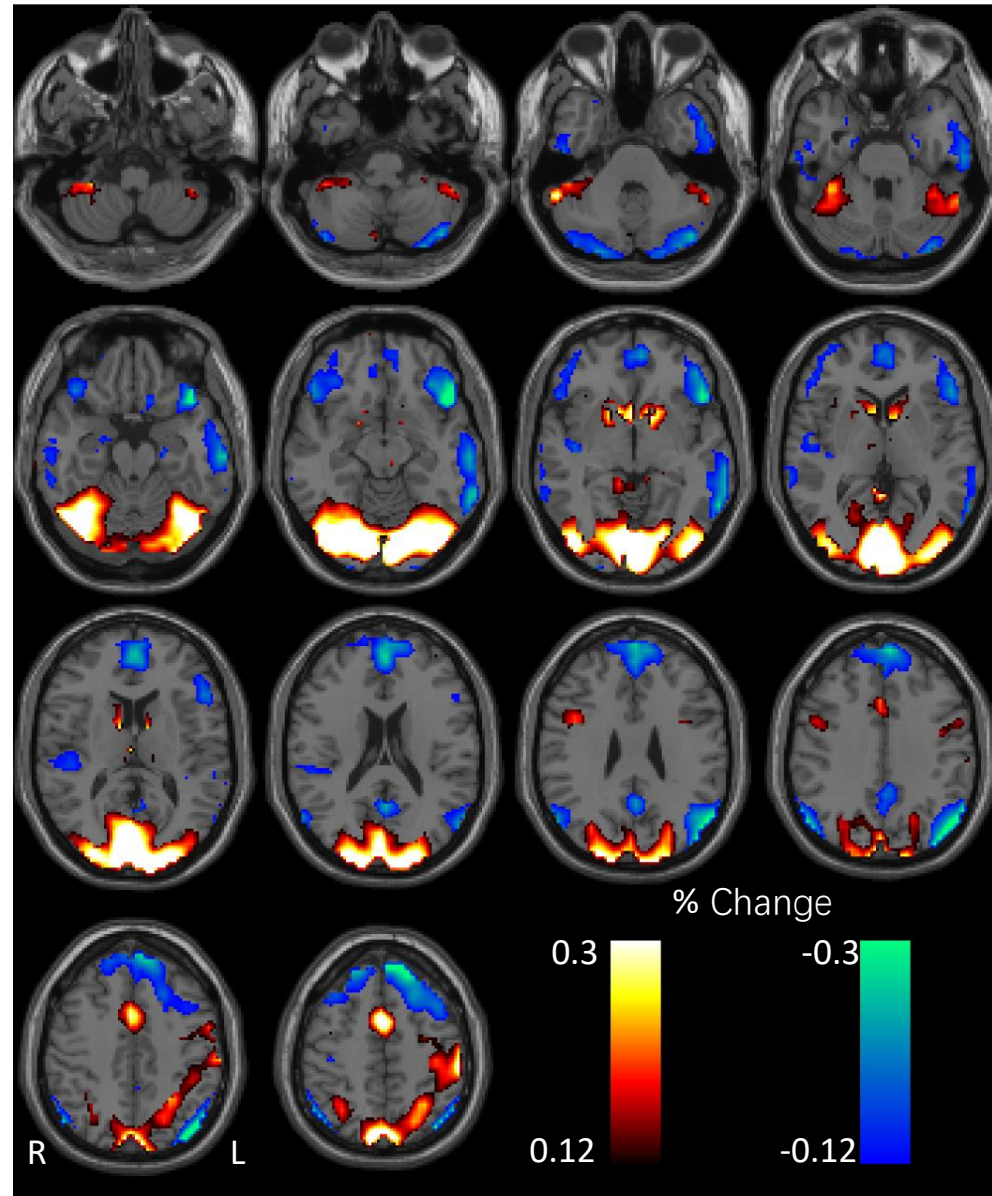

Rong Li et al.,  
2021 *Neuroimage*

9s

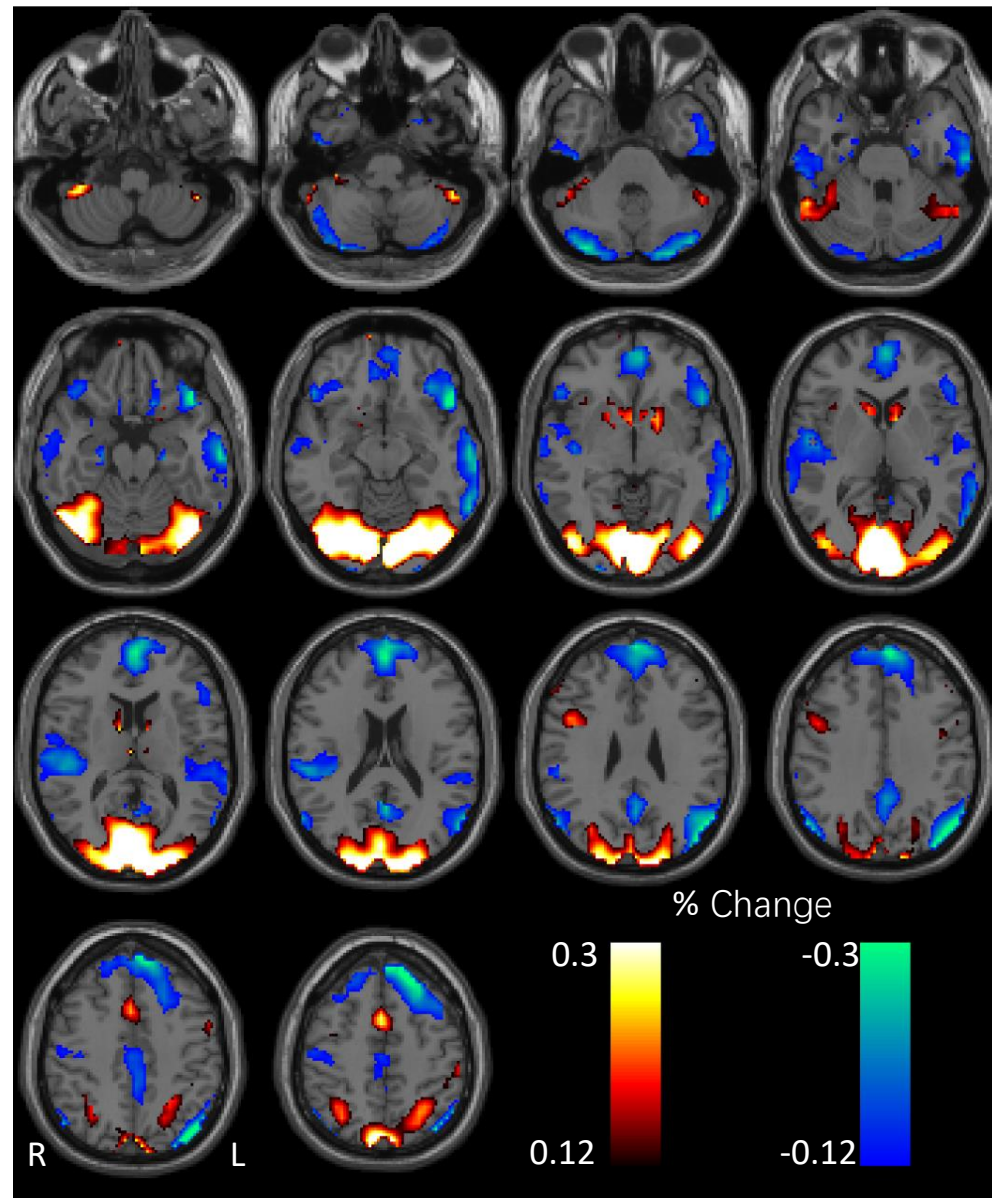

Rong Li et al.,  
2021 *Neuroimage*



10s

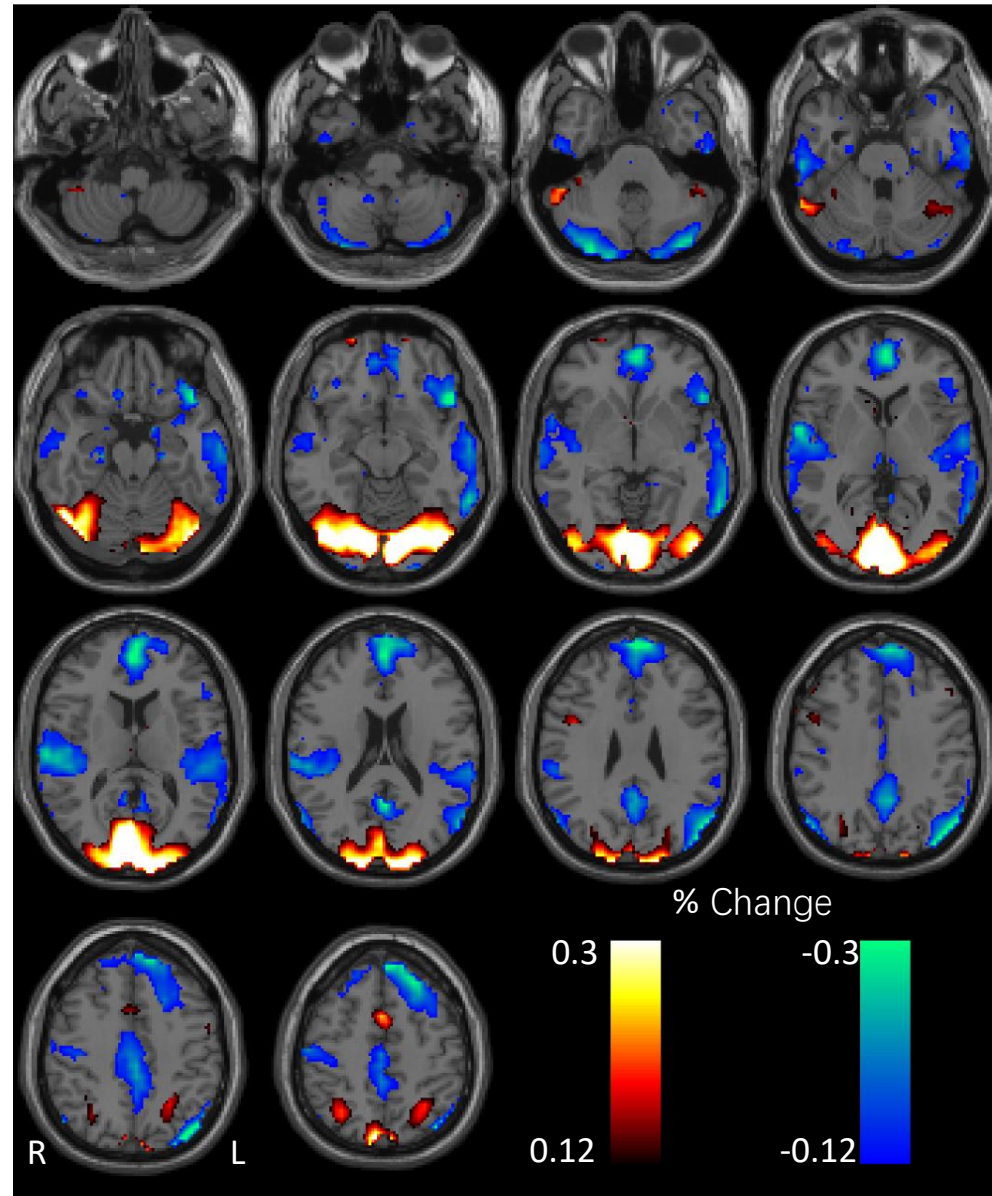

Rong Li et al.,  
2021 *Neuroimage*



11s

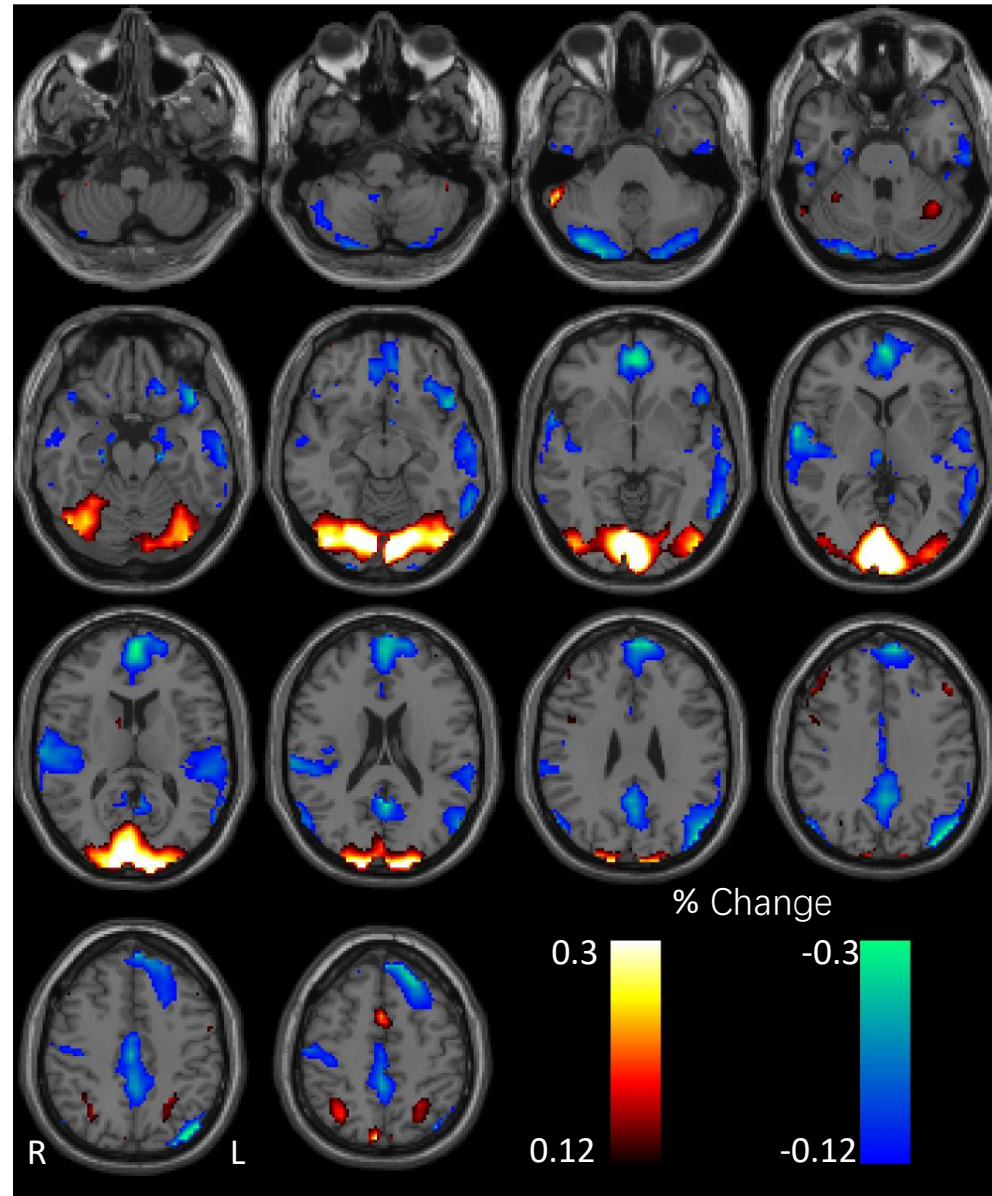

Rong Li et al.,  
2021 *Neuroimage*

12s

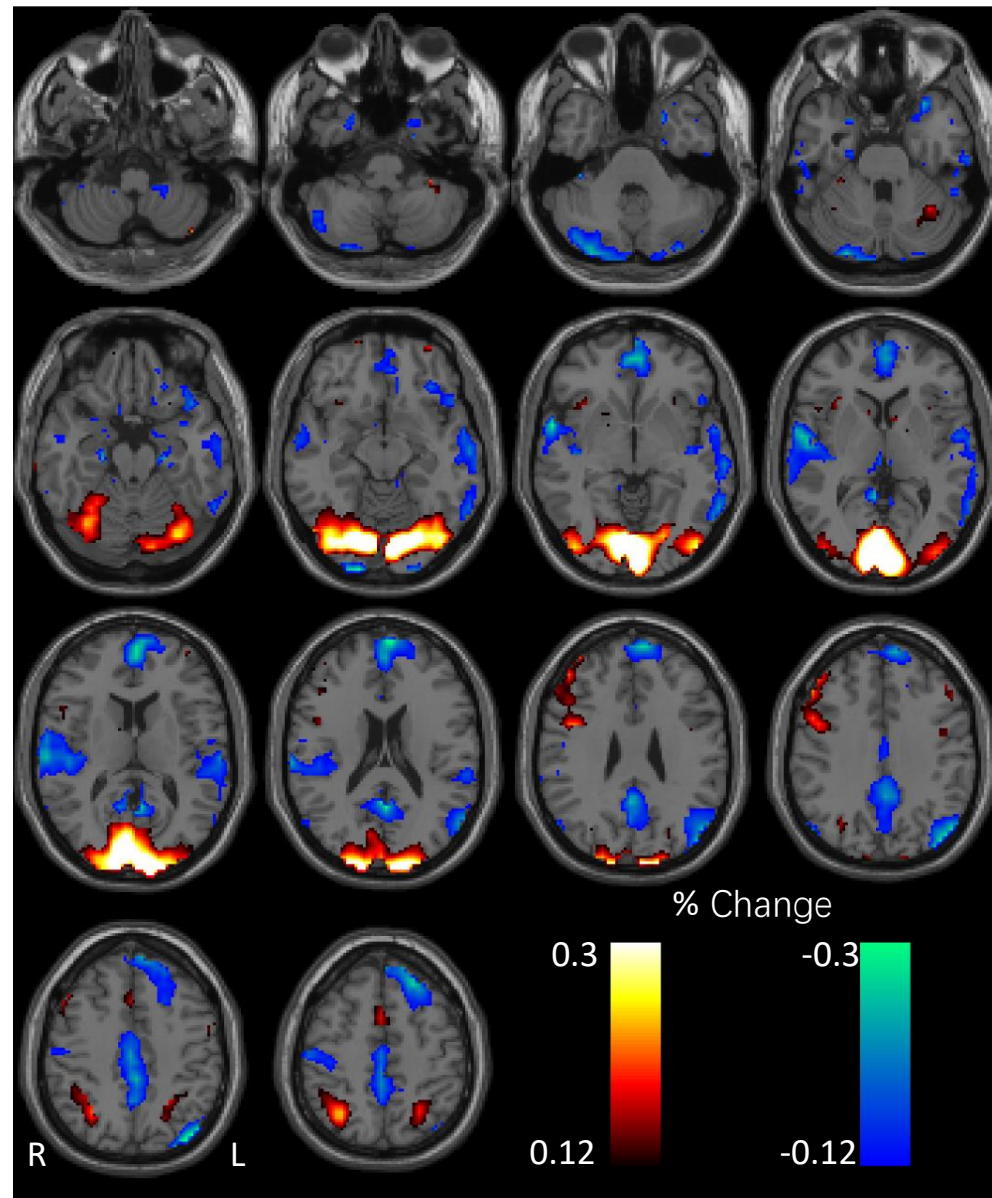

Rong Li et al.,  
2021 *Neuroimage*

13s

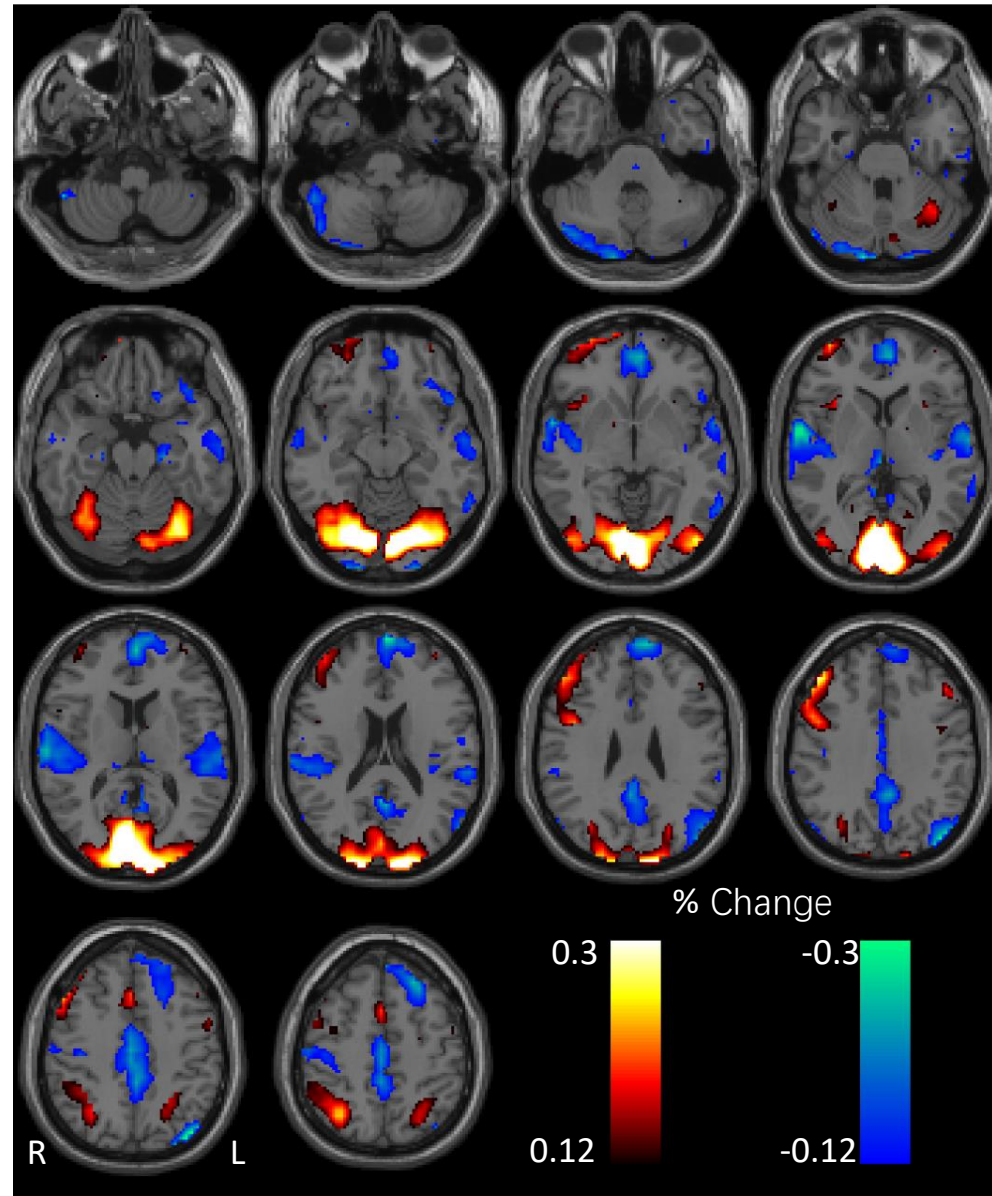

Rong Li et al.,  
2021 *Neuroimage*

14s

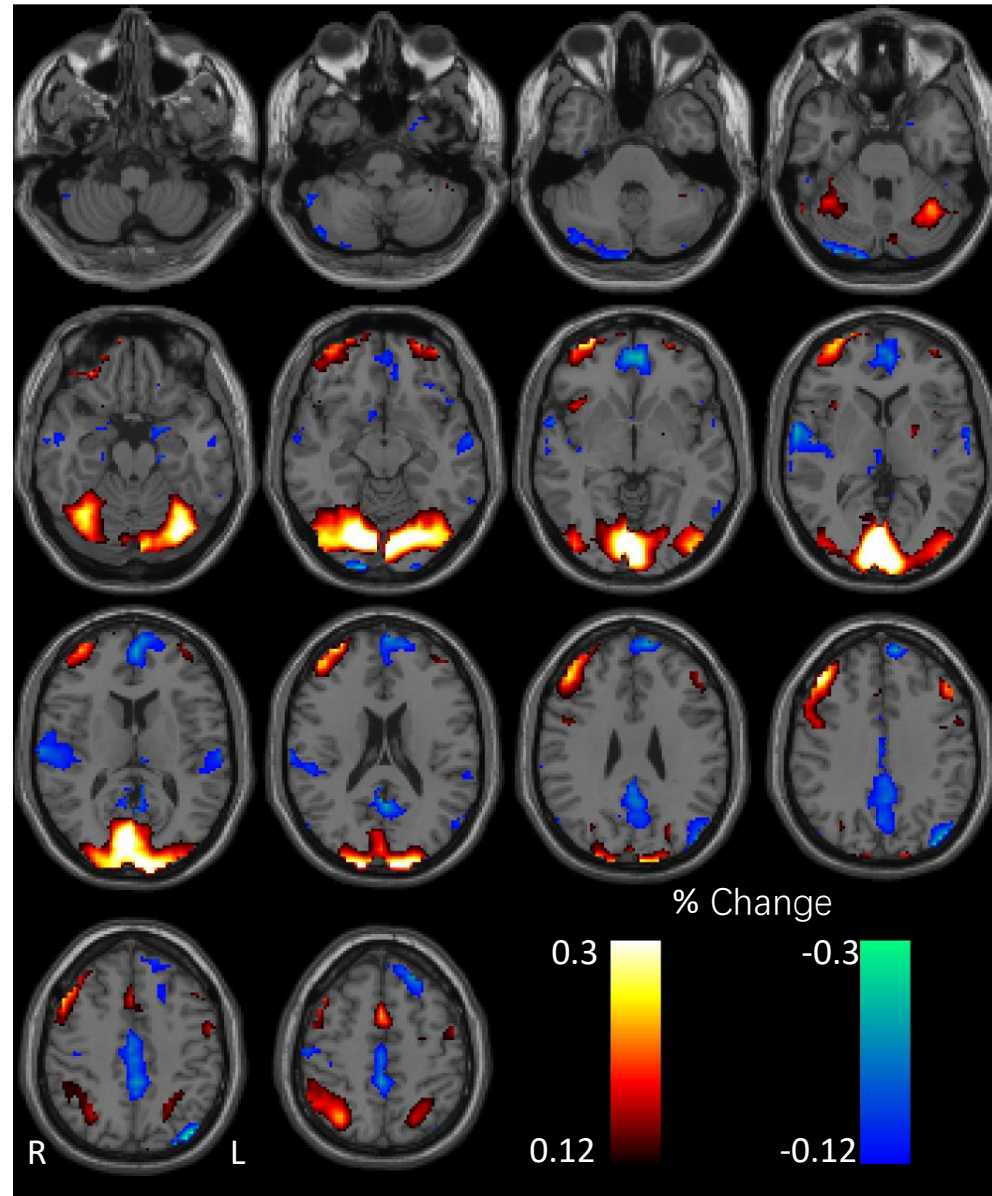

Rong Li et al.,  
2021 *Neuroimage*



15s

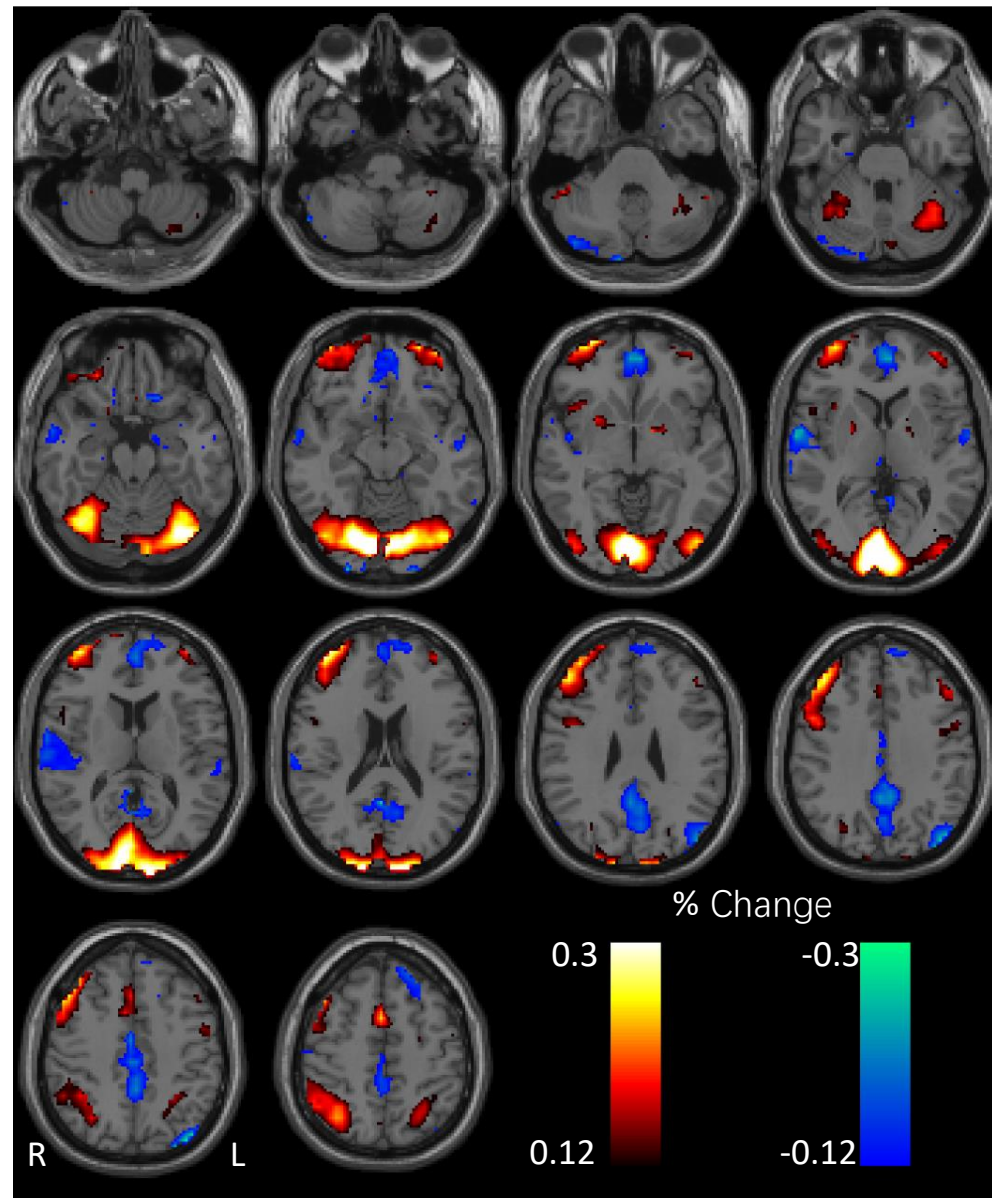

Rong Li et al.,  
2021 *Neuroimage*

16s

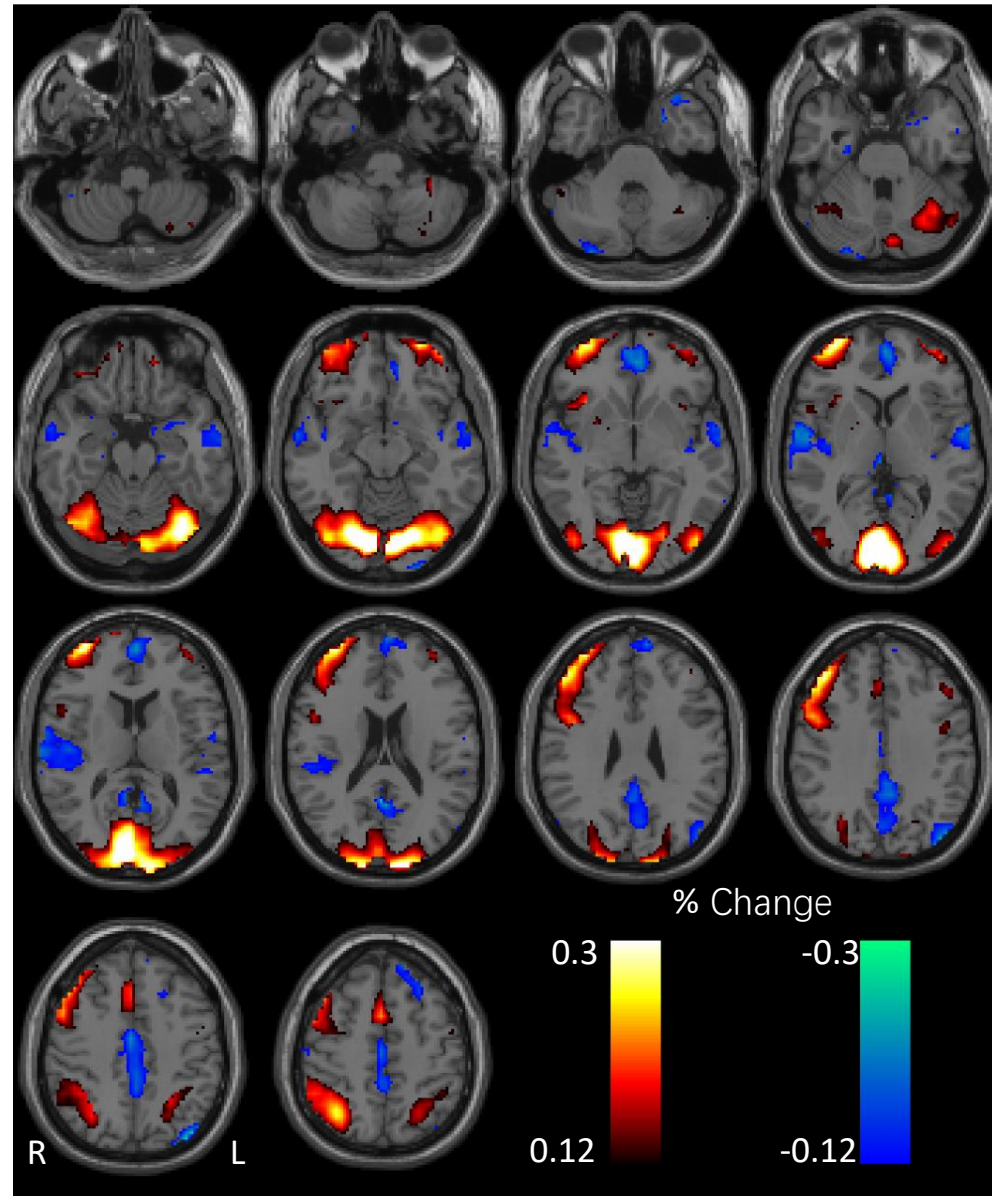

Rong Li et al.,  
2021 *Neuroimage*

17s

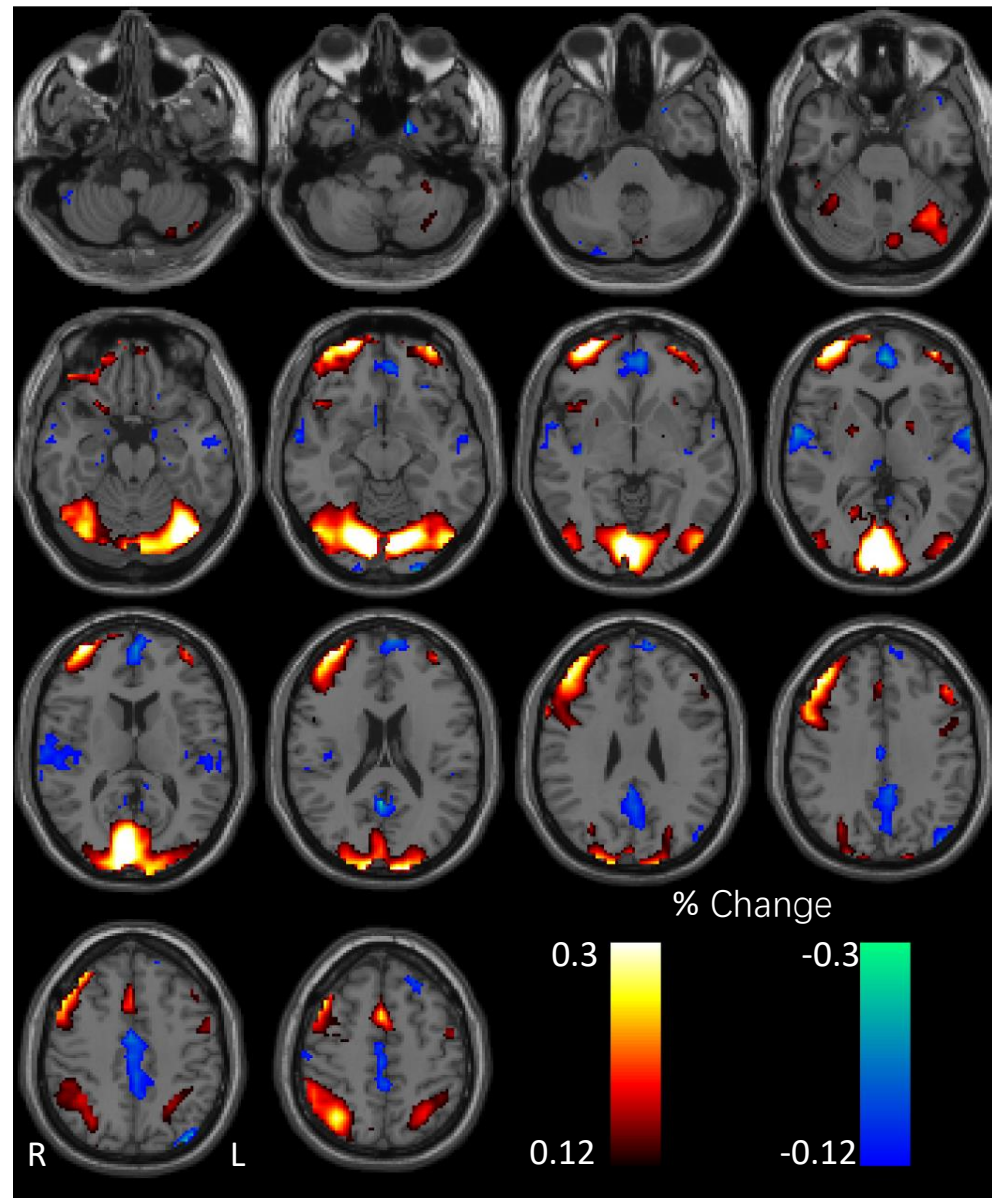

Rong Li et al.,  
2021 *Neuroimage*

18s

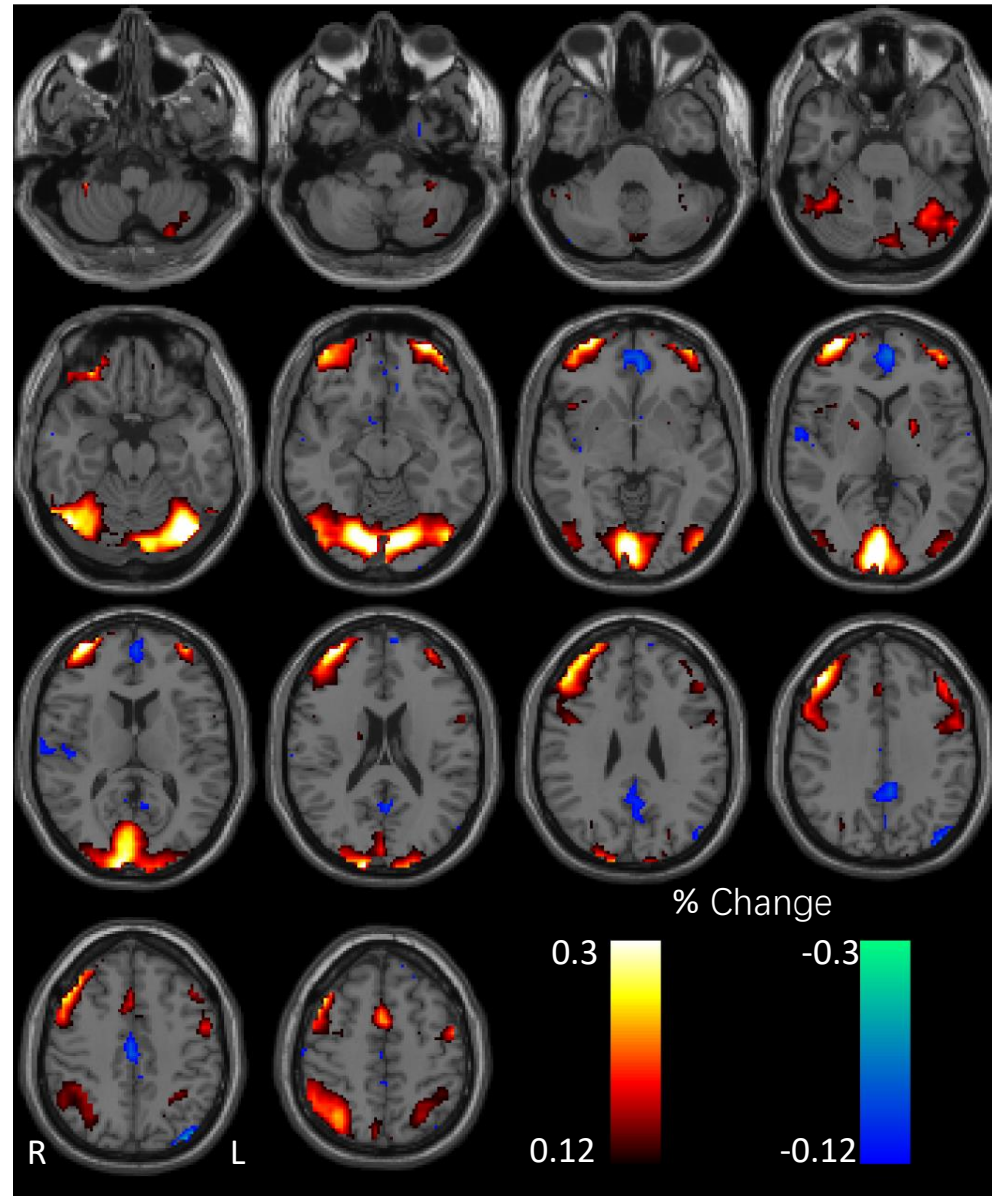

Rong Li et al.,  
2021 *Neuroimage*



19s

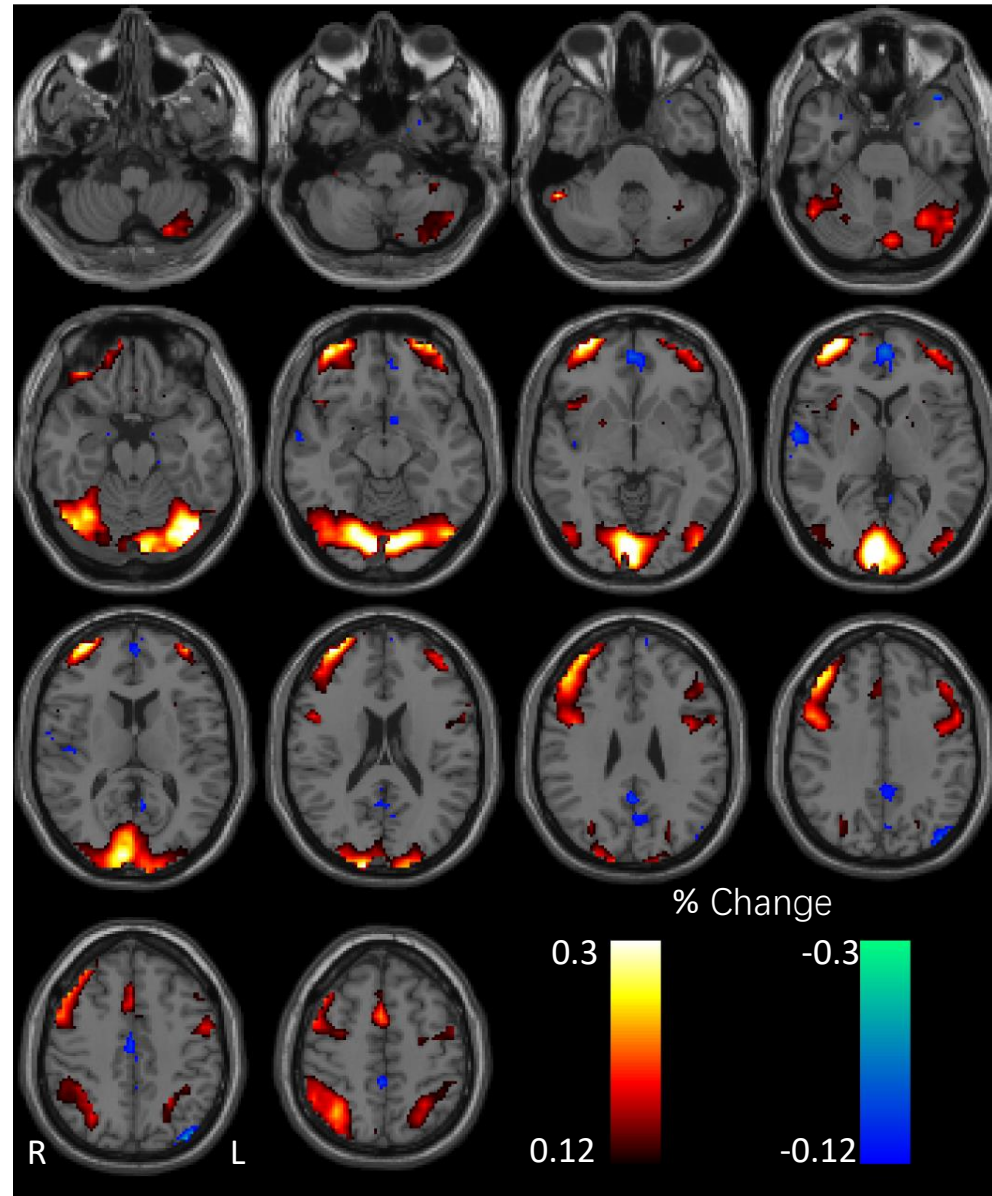

Rong Li et al.,  
2021 *Neuroimage*

20s

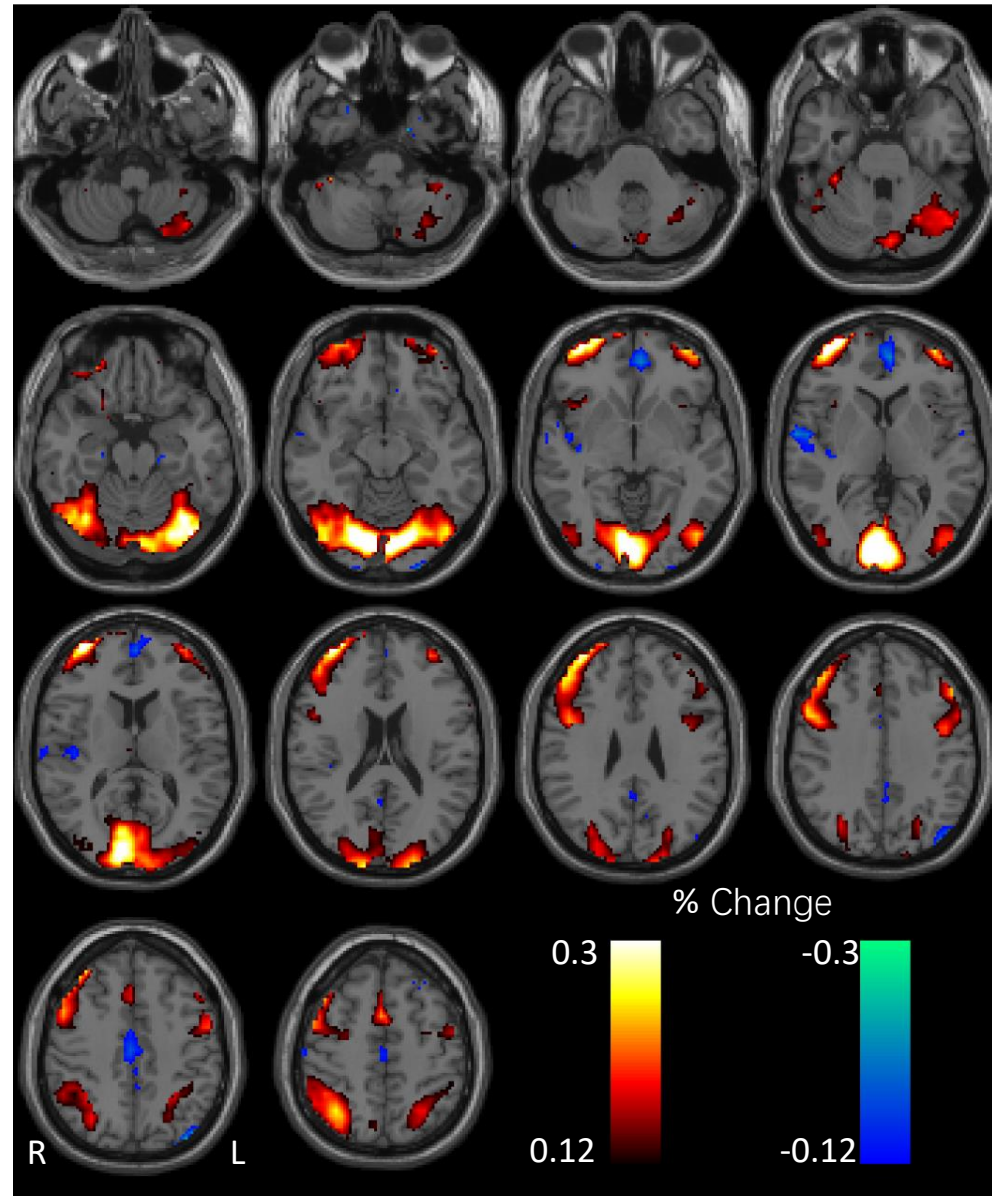

Rong Li et al.,  
2021 *Neuroimage*

21s

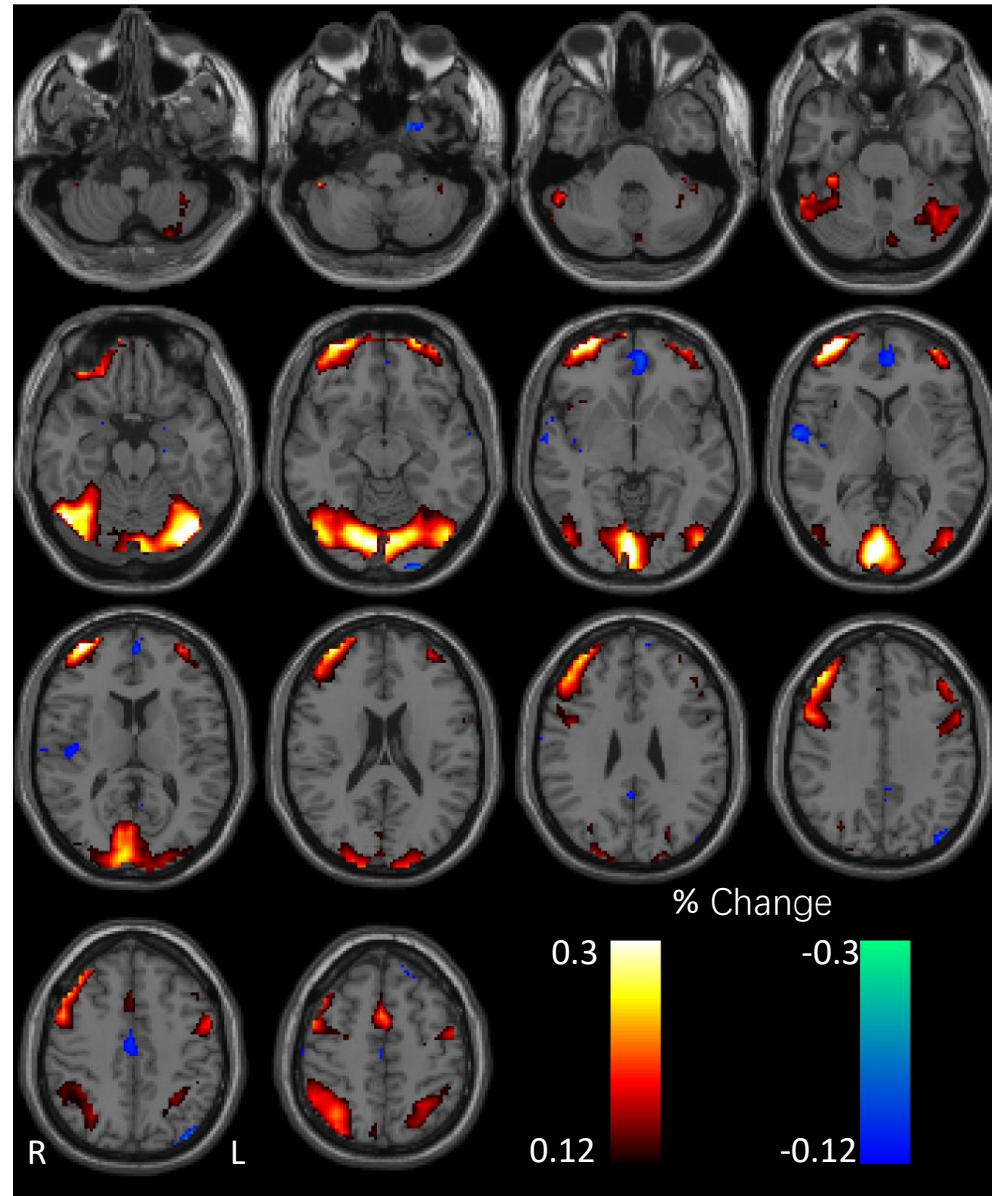

Rong Li et al.,  
2021 *Neuroimage*

22s

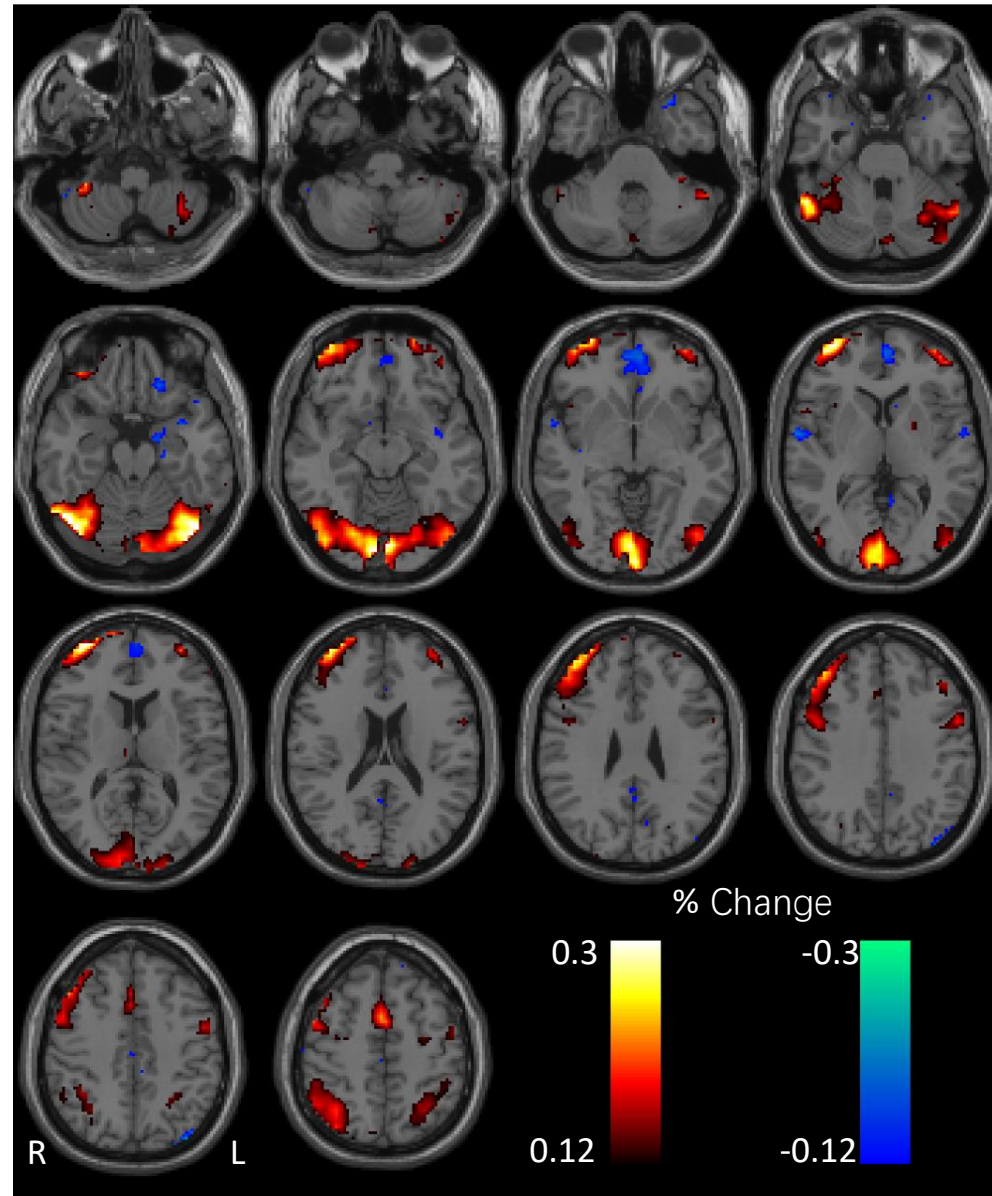

Rong Li et al.,  
2021 *Neuroimage*



23s

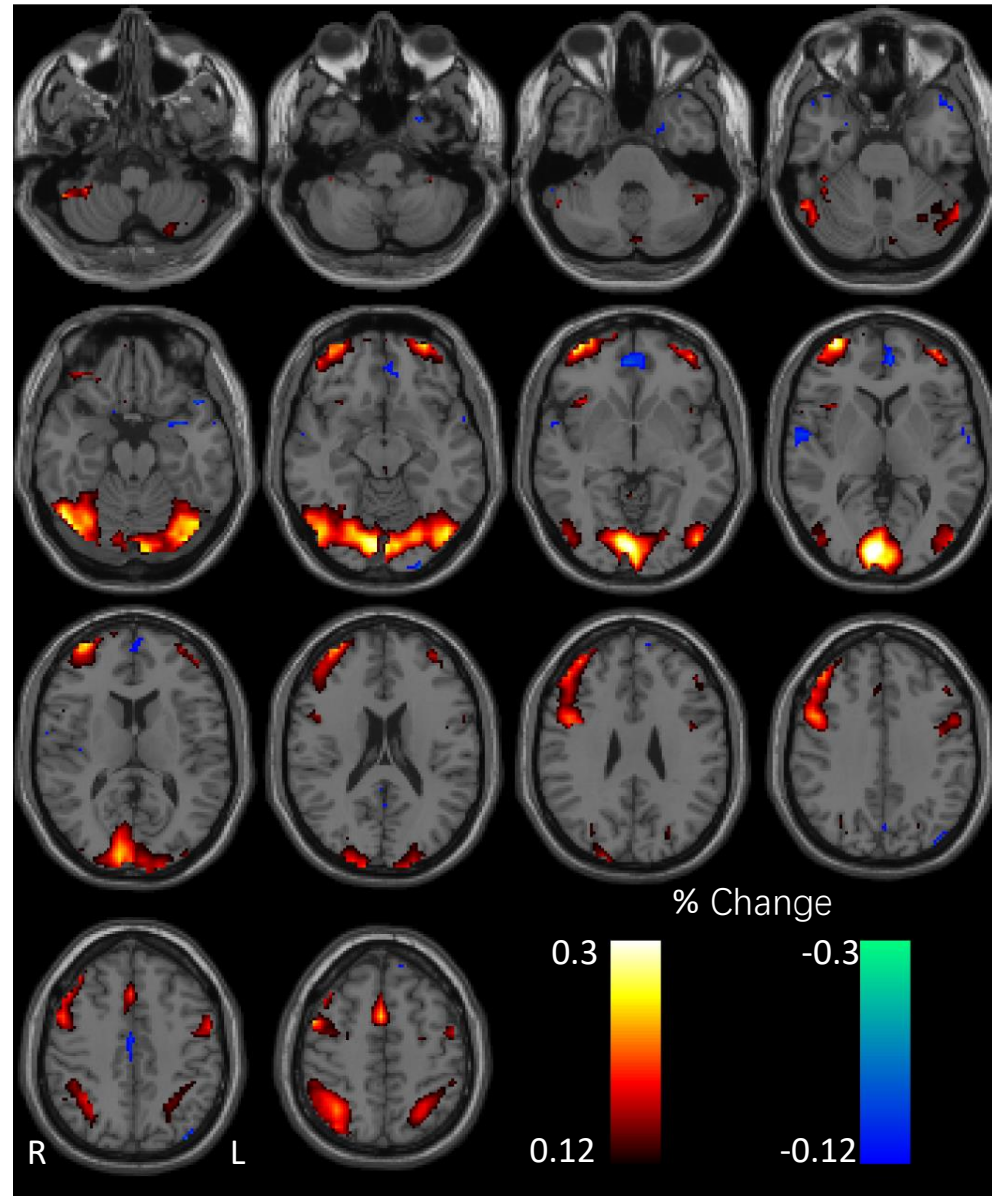

Rong Li et al.,  
2021 *Neuroimage*

24s

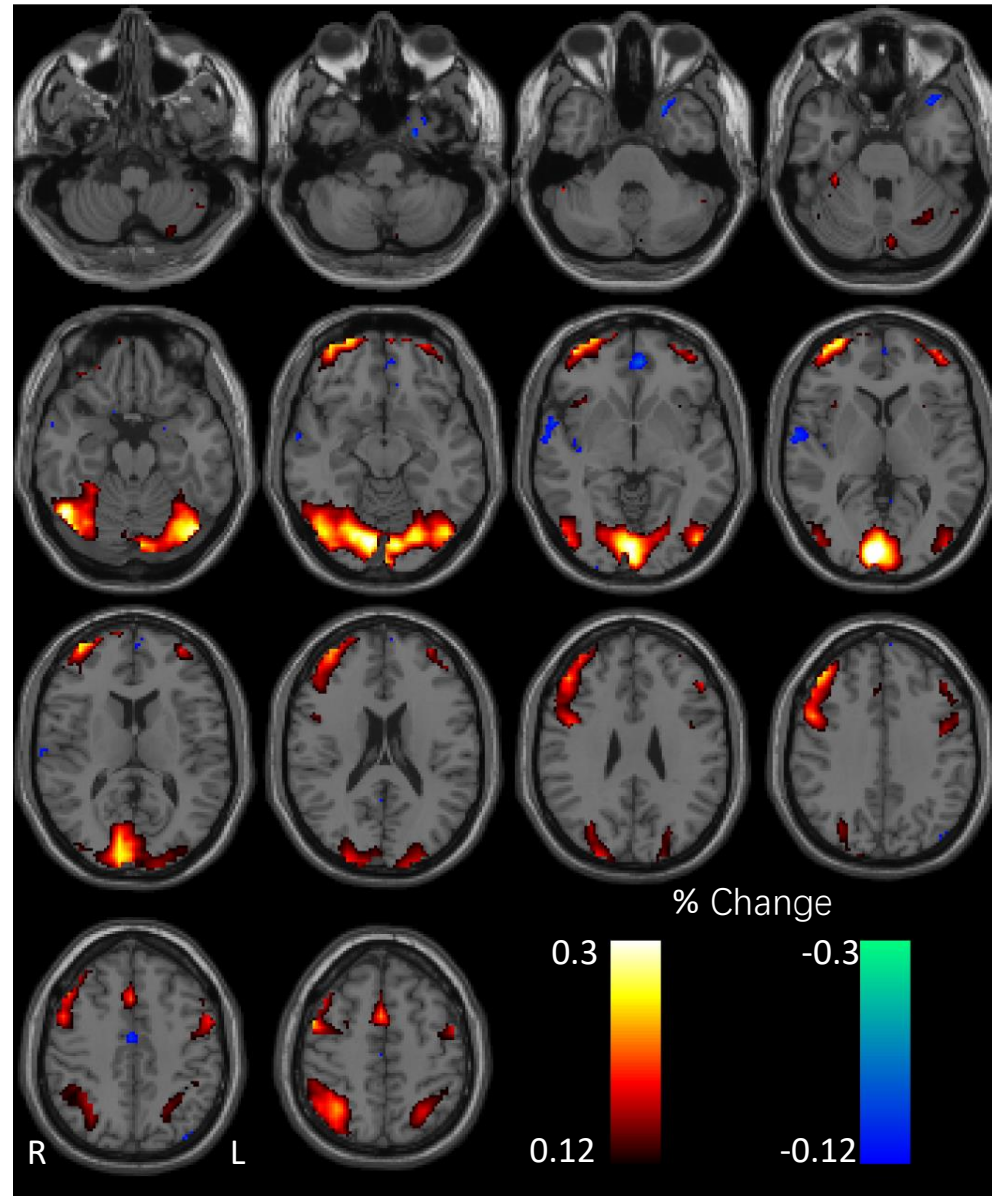

Rong Li et al.,  
2021 *Neuroimage*

25s

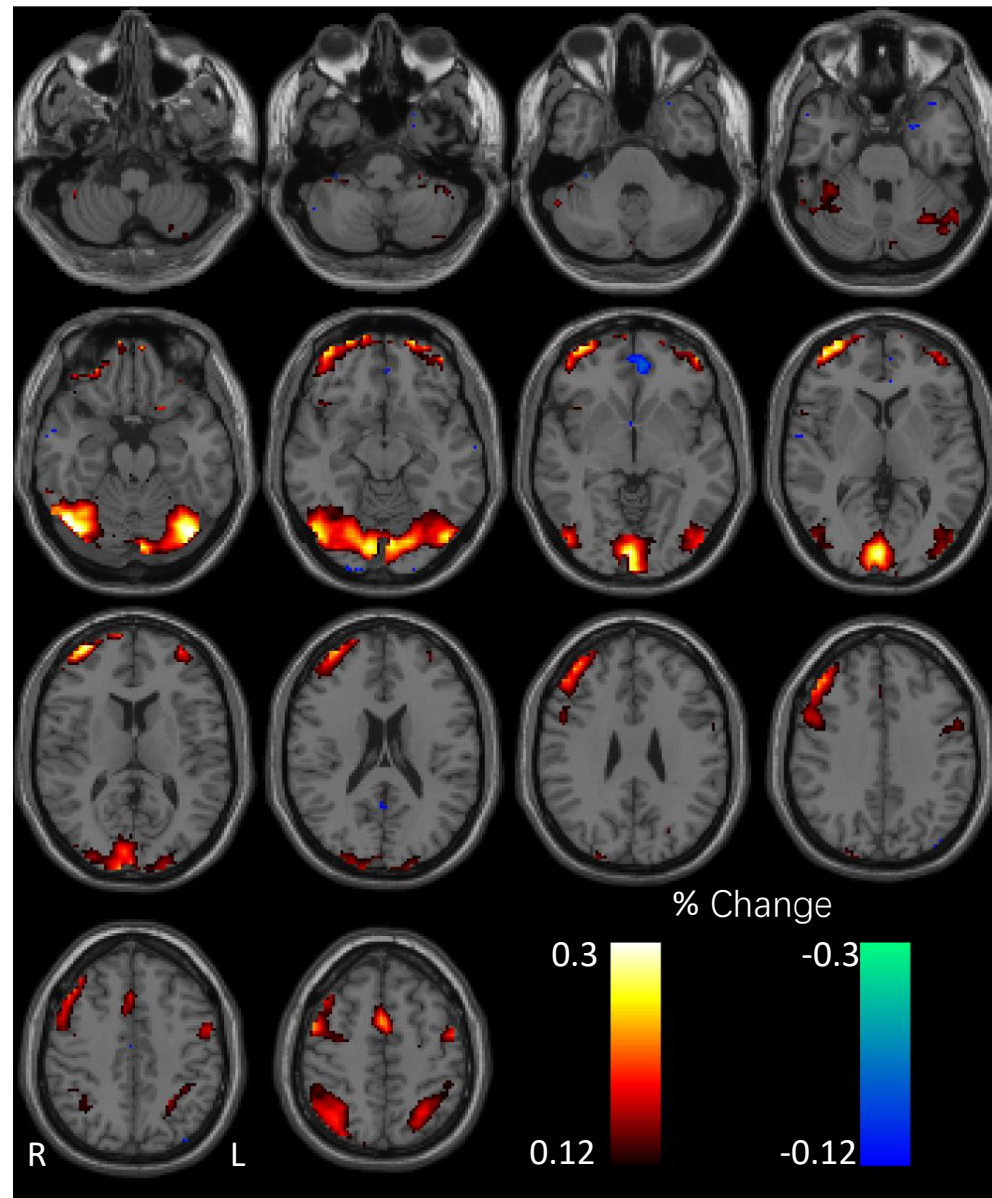

Rong Li et al.,  
2021 *Neuroimage*

26s

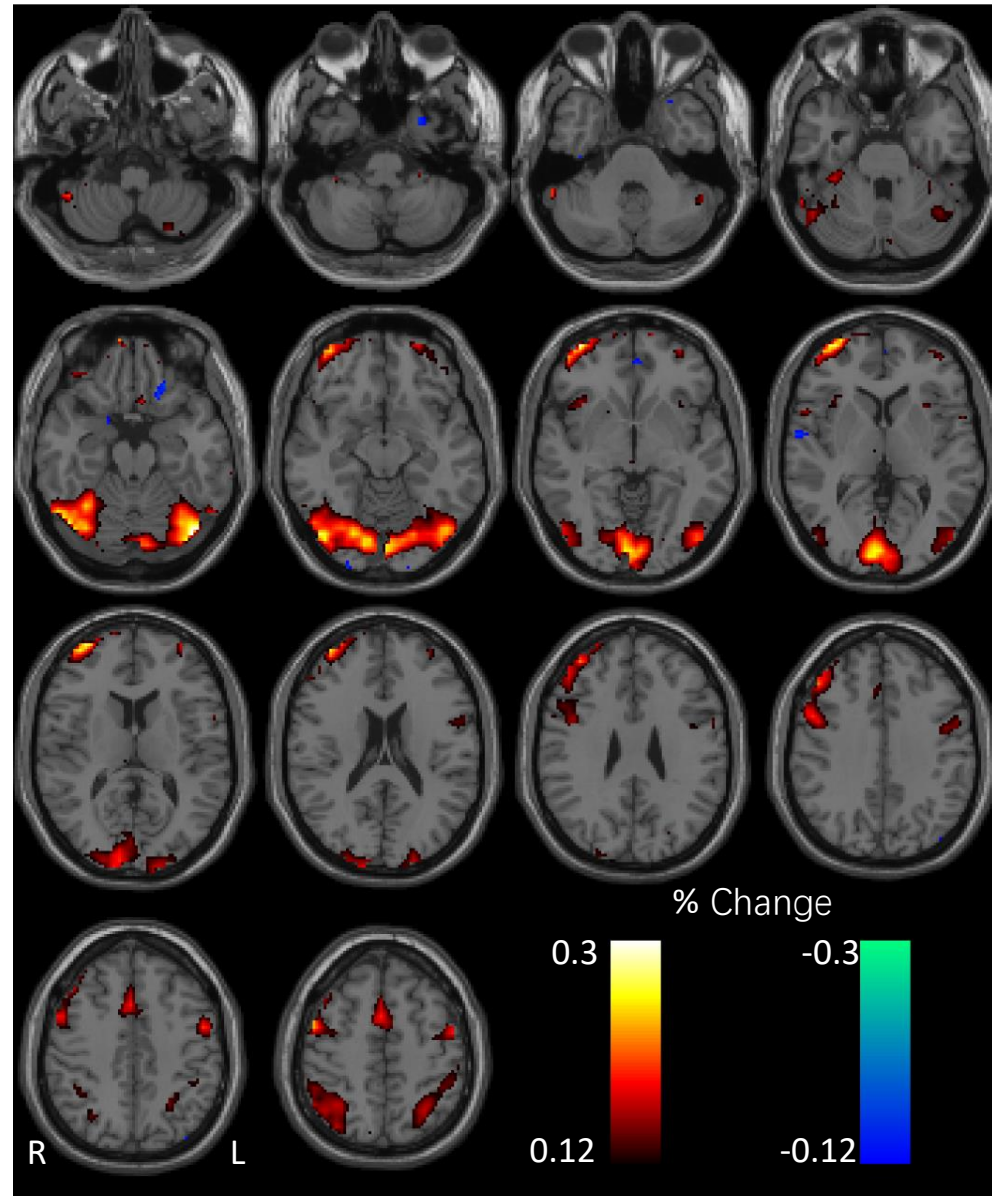

Rong Li et al.,  
2021 *Neuroimage*



27s

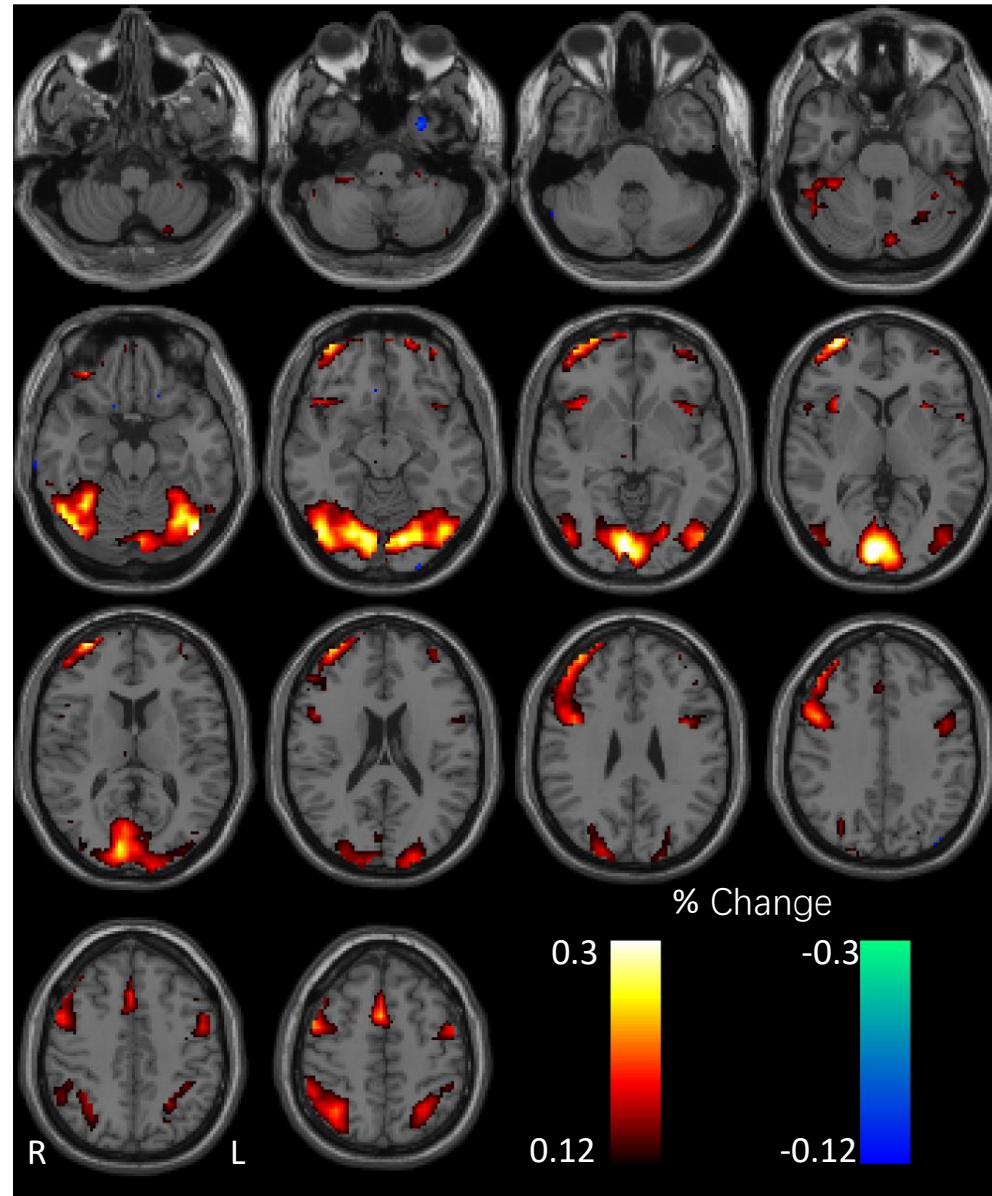

Rong Li et al.,  
2021 *Neuroimage*

28s

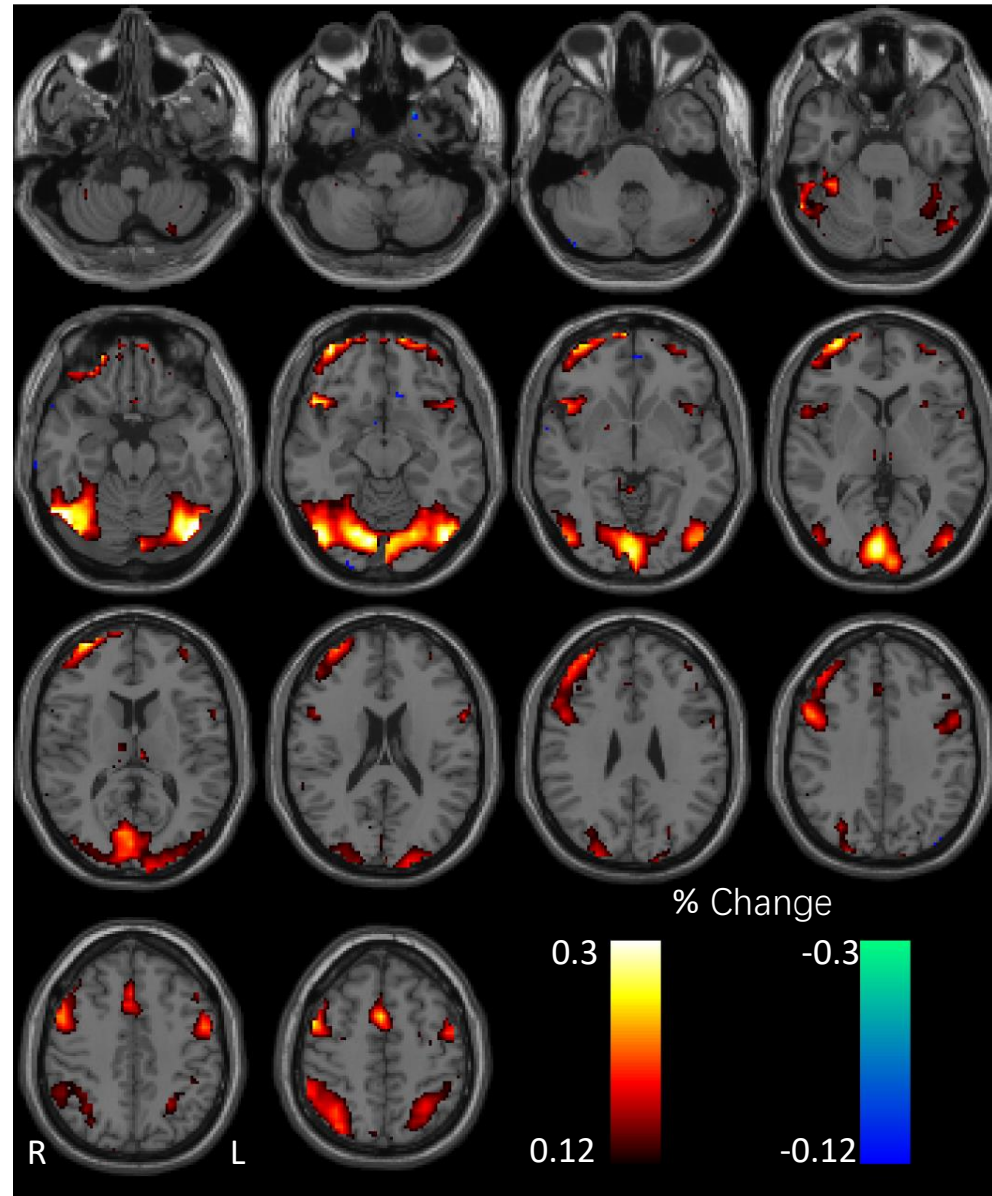

Rong Li et al.,  
2021 *Neuroimage*

29s

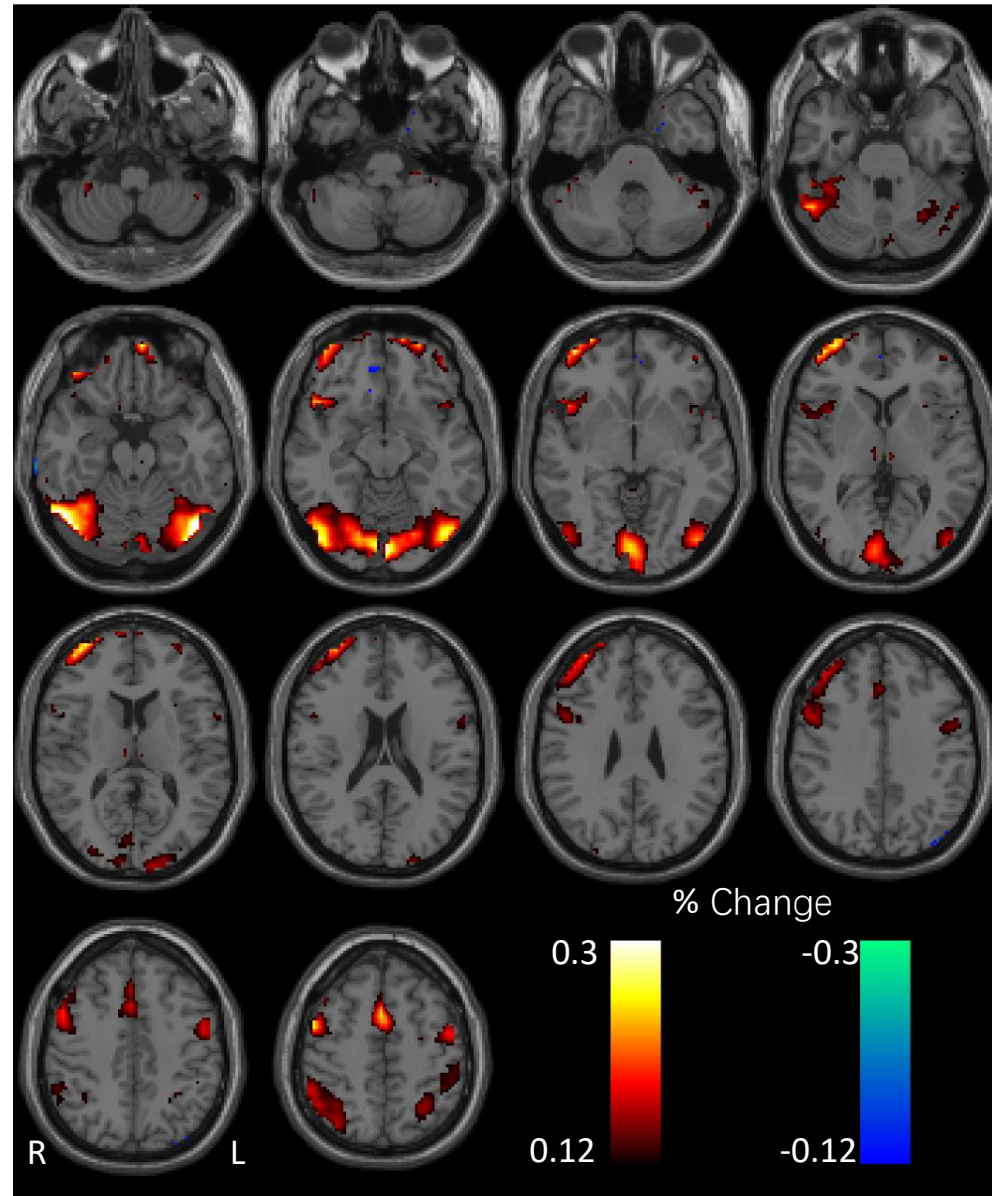

Rong Li et al.,  
2021 *Neuroimage*

30s

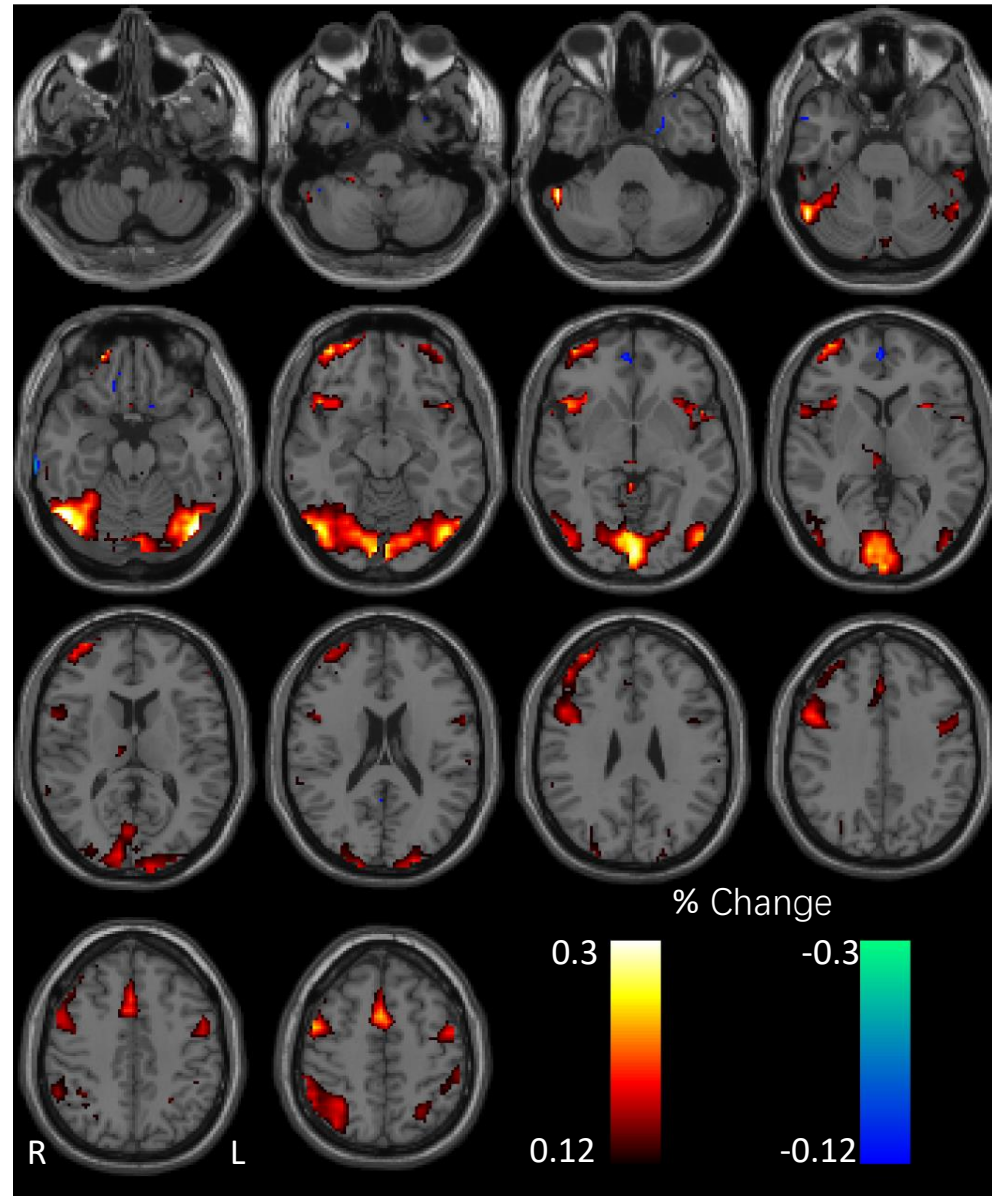

Rong Li et al.,  
2021 *Neuroimage*



31s

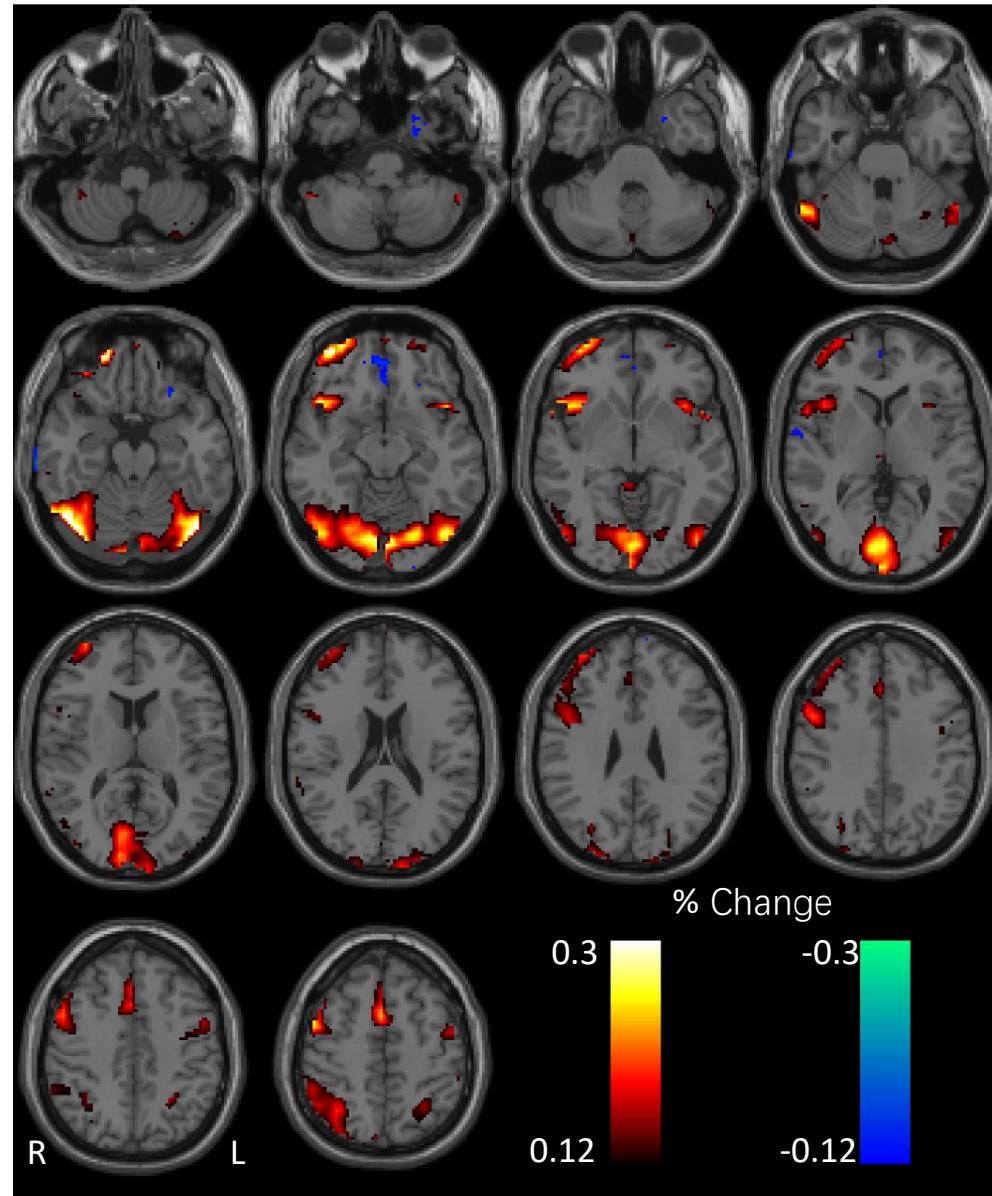

Rong Li et al.,  
2021 *Neuroimage*

32s

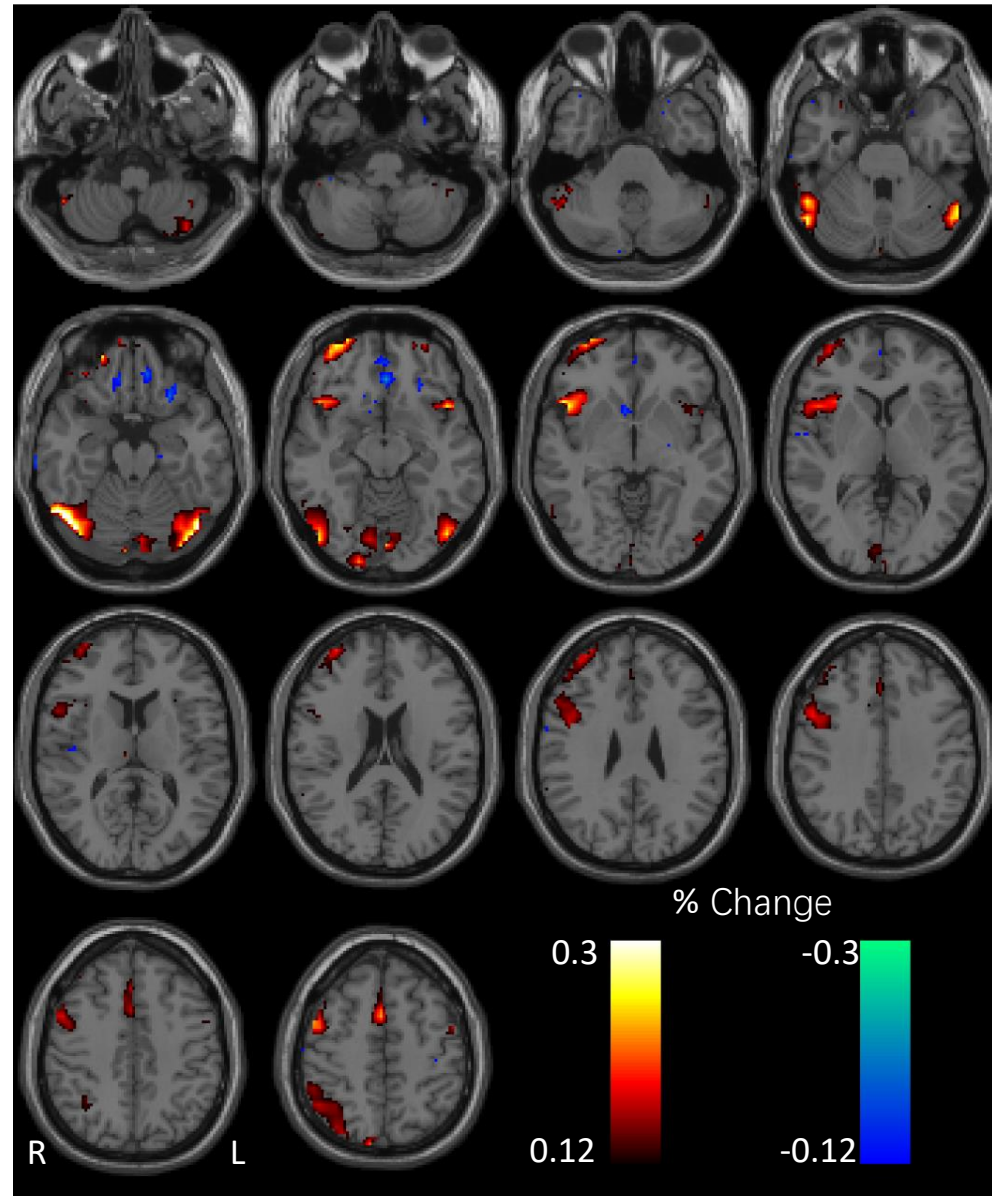

Rong Li et al.,  
2021 *Neuroimage*

33s

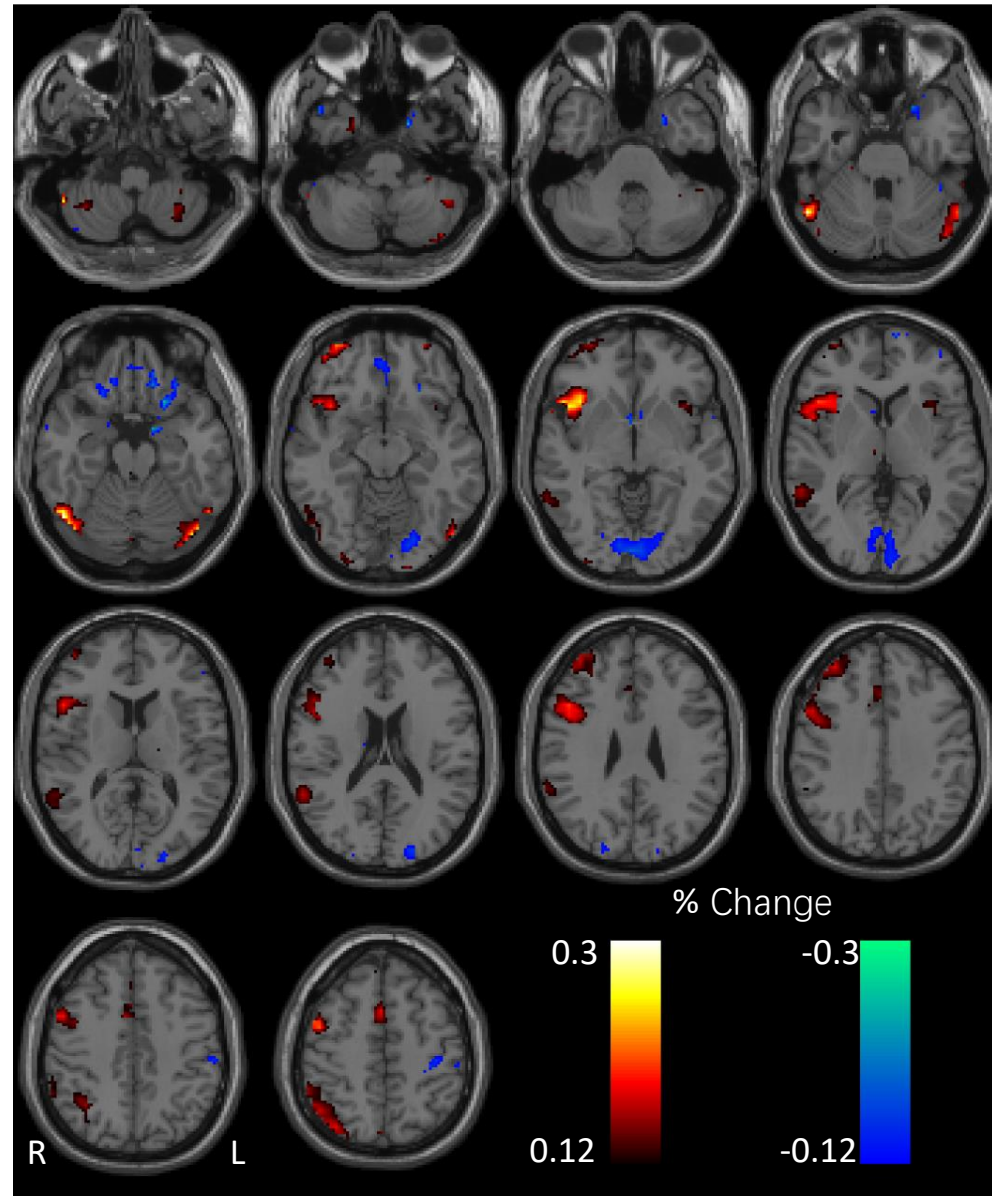

Rong Li et al.,  
2021 *Neuroimage*

34s

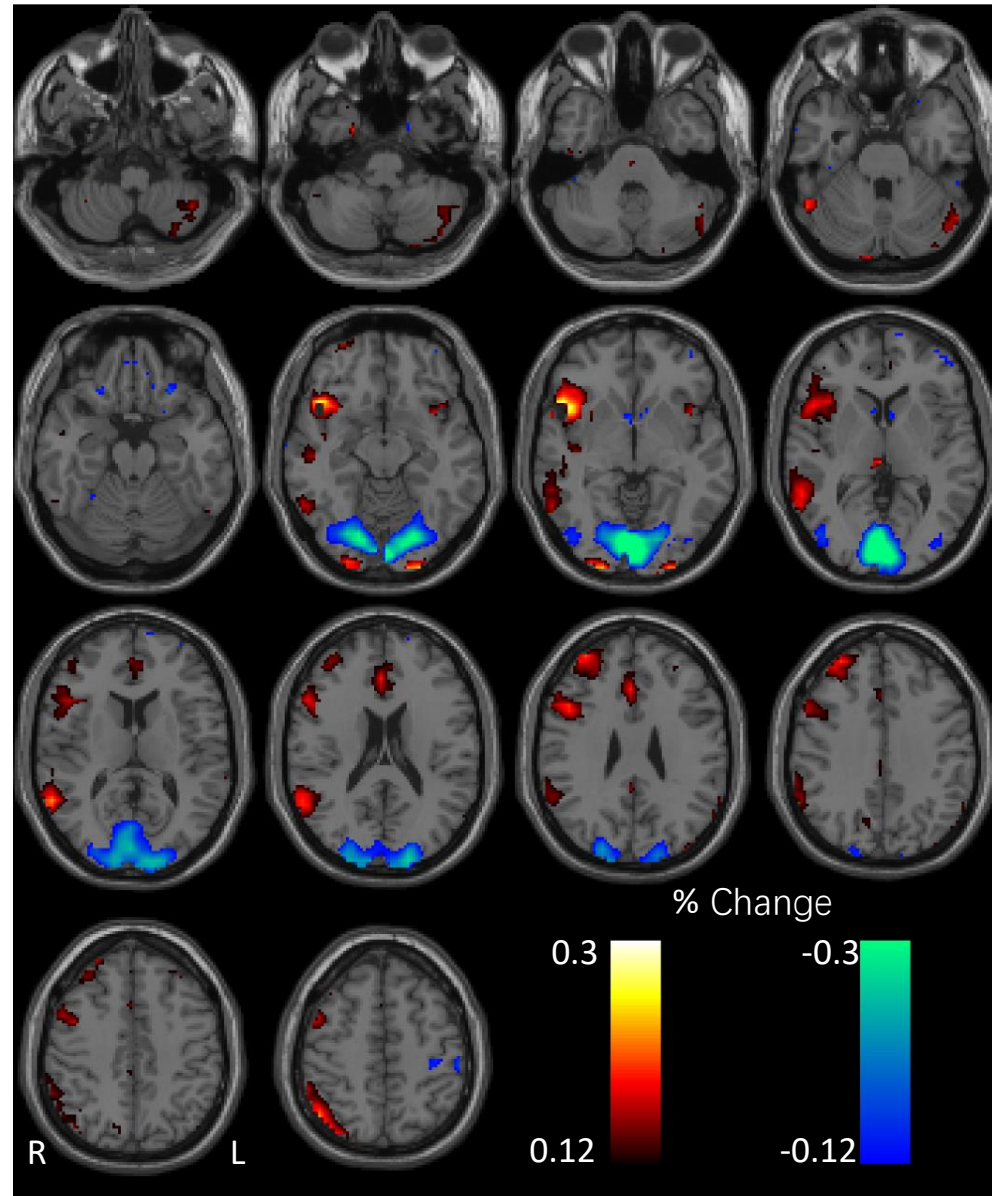

Rong Li et al.,  
2021 *Neuroimage*



35s

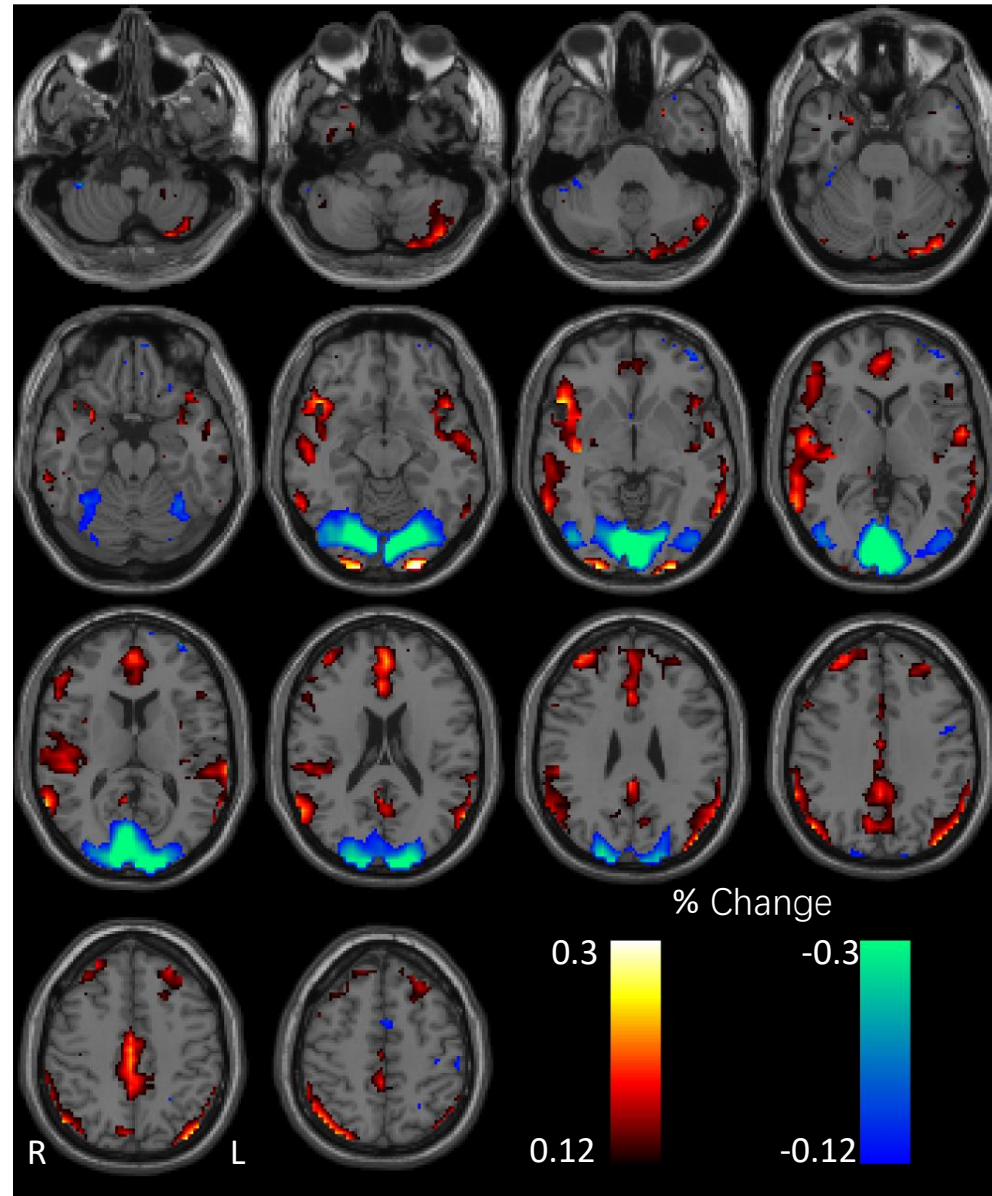

Rong Li et al.,  
2021 *Neuroimage*

36s

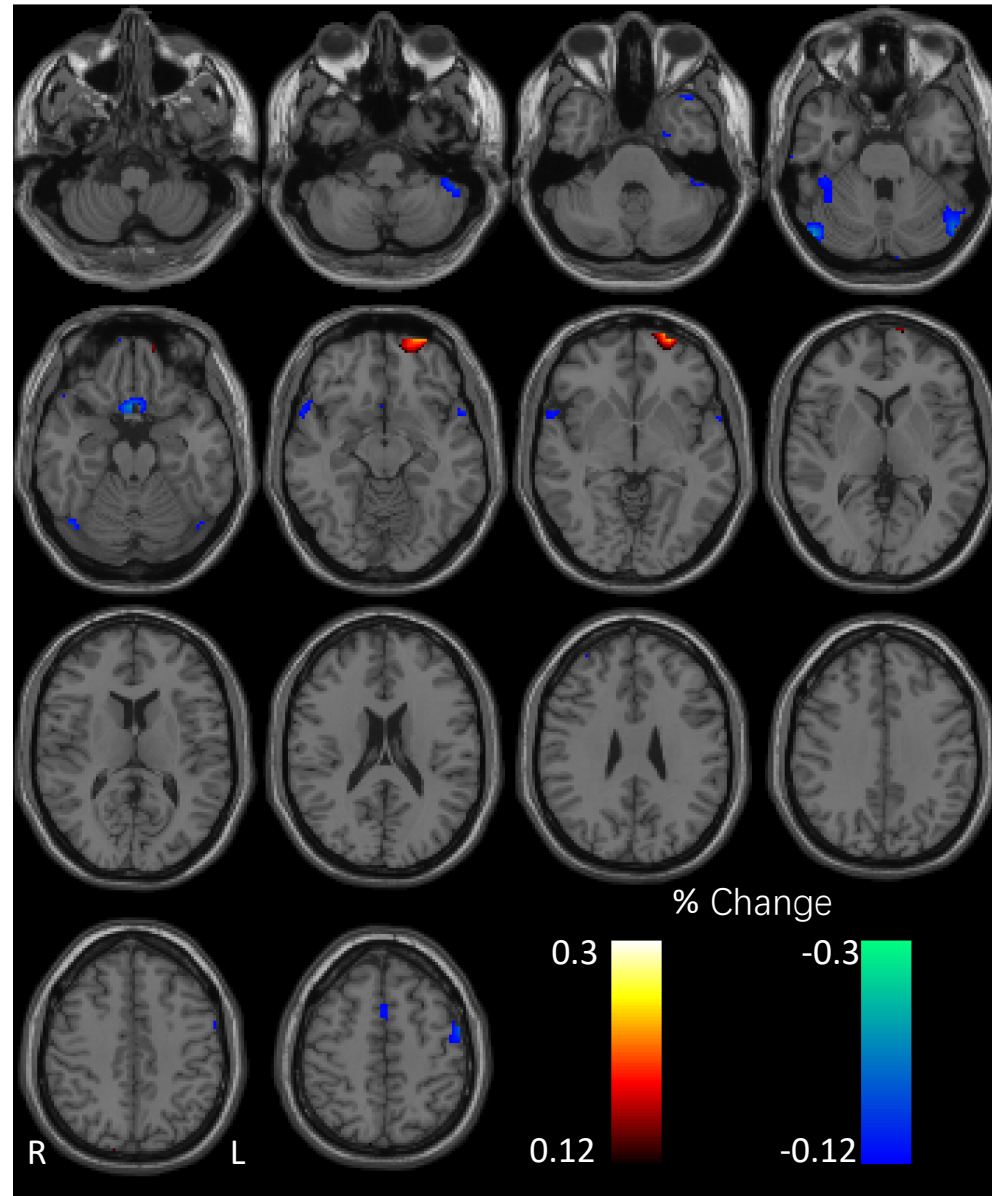

Rong Li et al.,  
2021 *Neuroimage*

37s

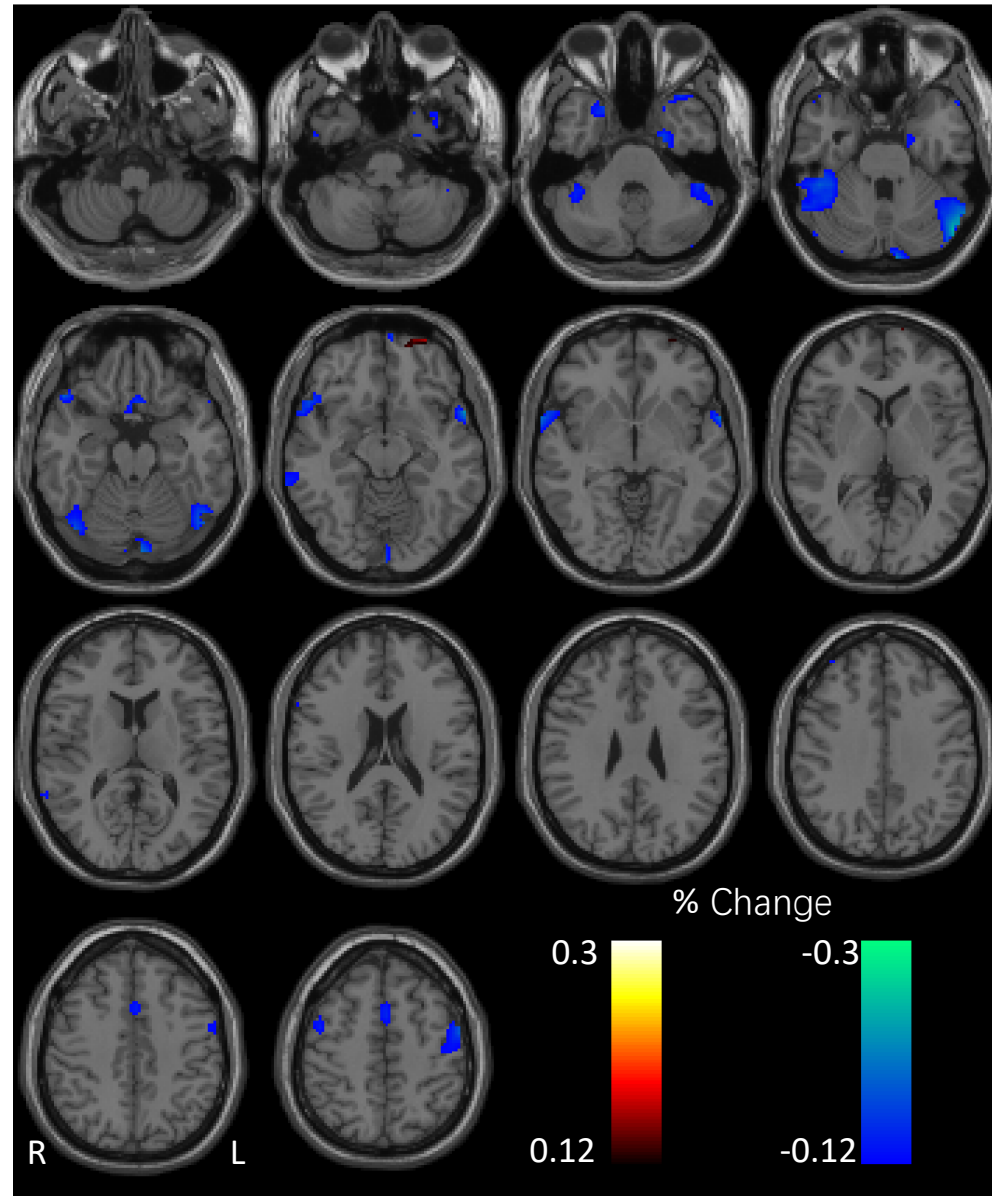

Rong Li et al.,  
2021 *Neuroimage*

38s

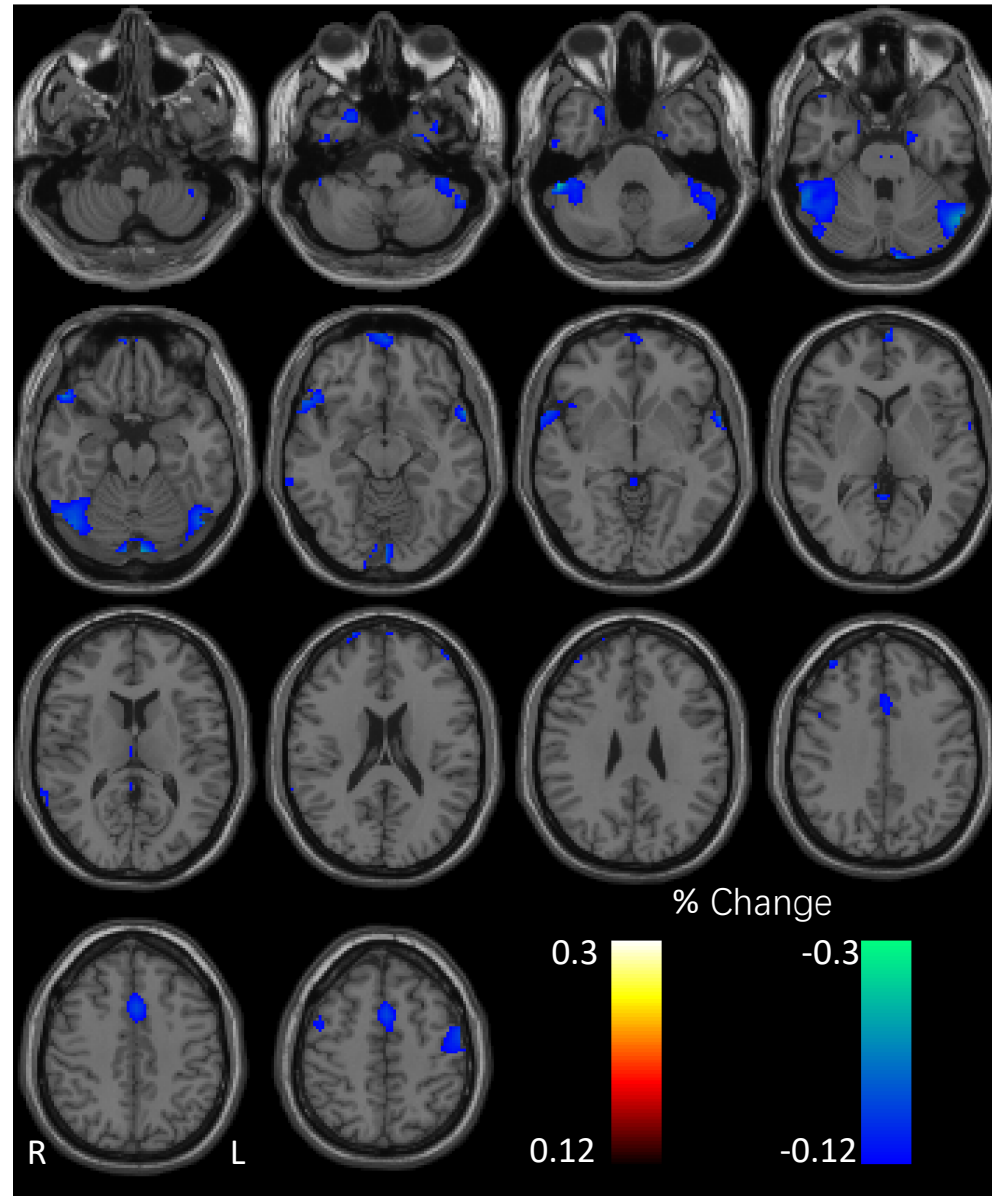

Rong Li et al.,  
2021 *Neuroimage*



39s

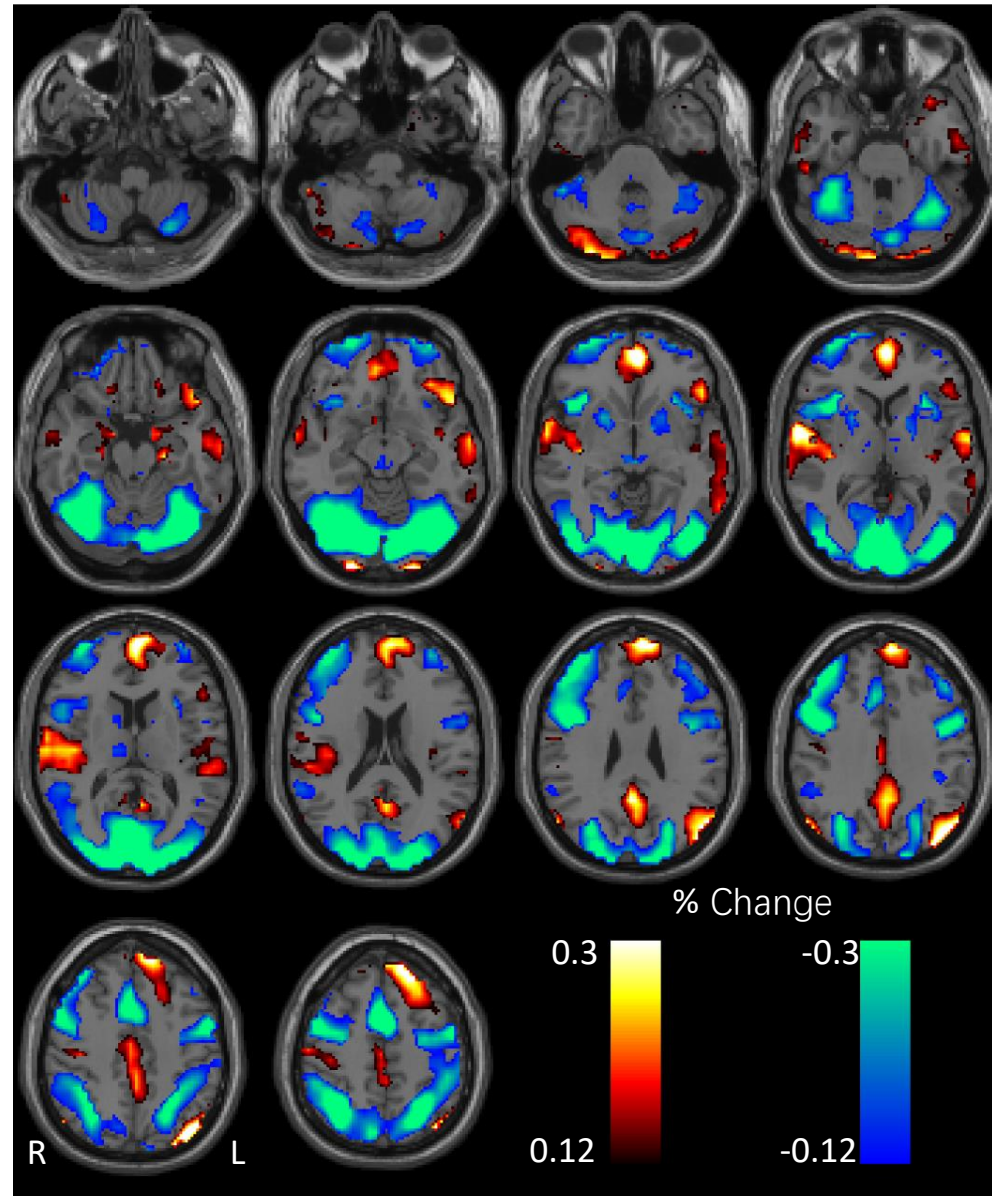

Rong Li et al.,  
2021 *Neuroimage*

40s

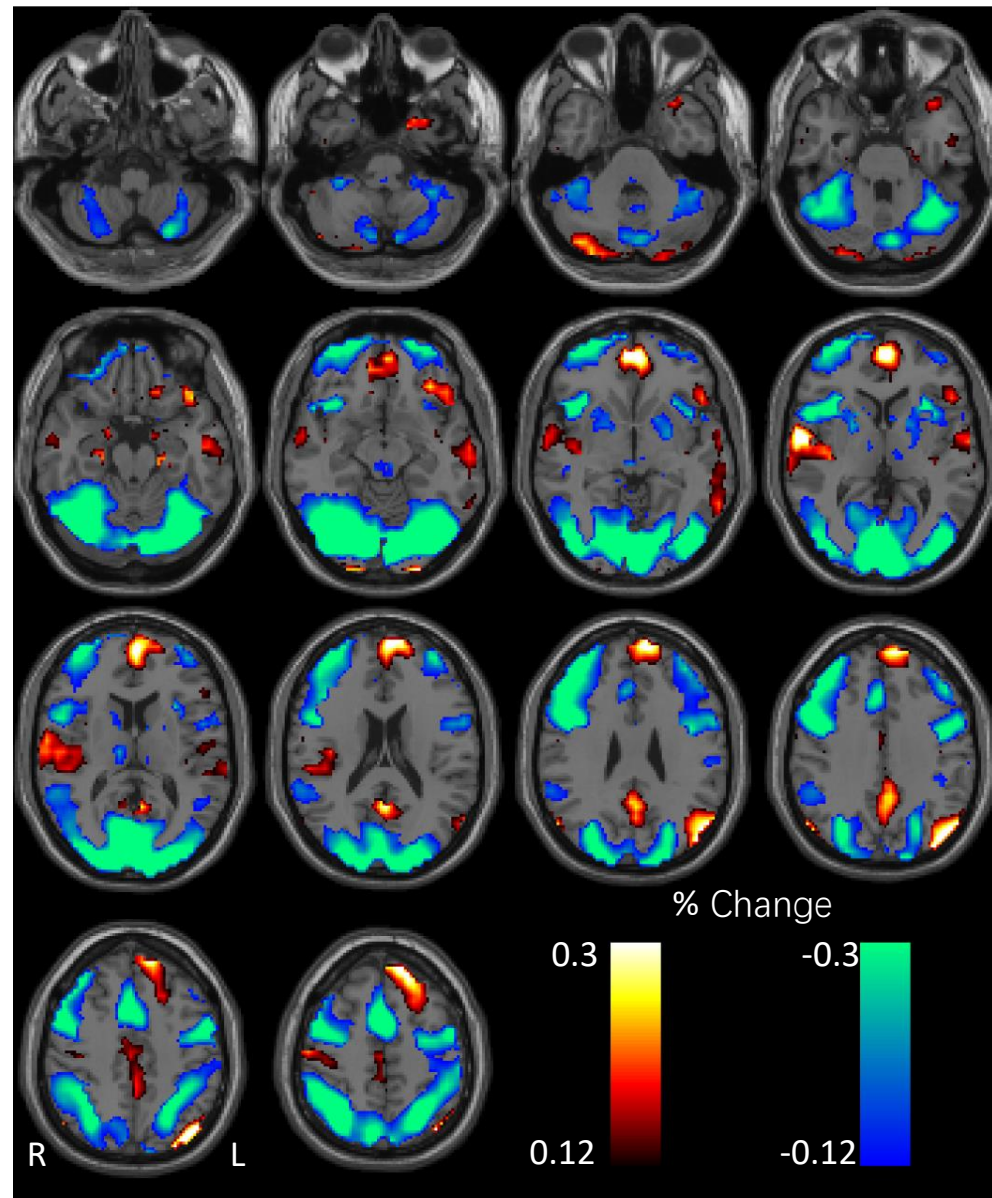

Rong Li et al.,  
2021 *Neuroimage*

41s

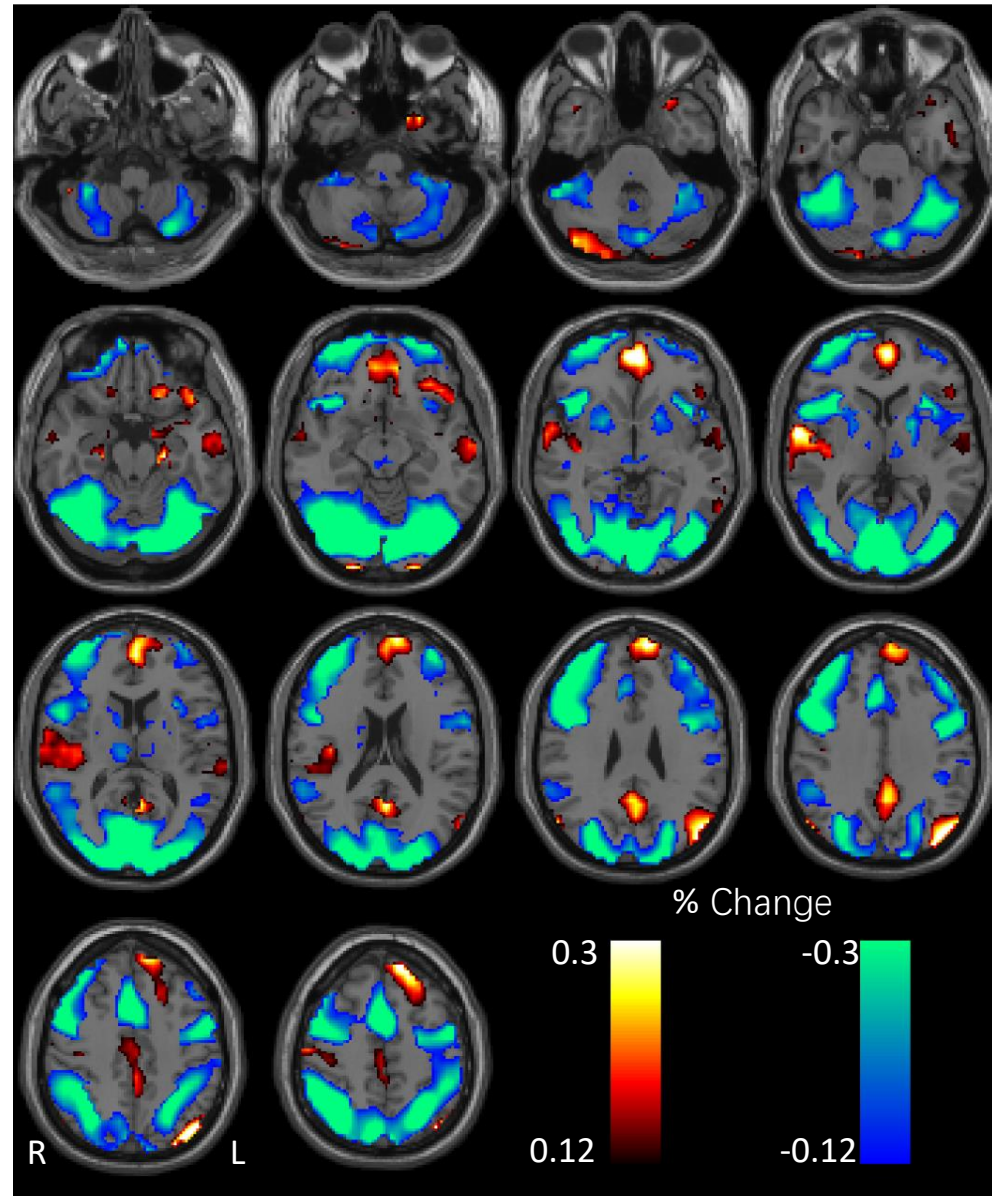

Rong Li et al.,  
2021 *Neuroimage*



42s

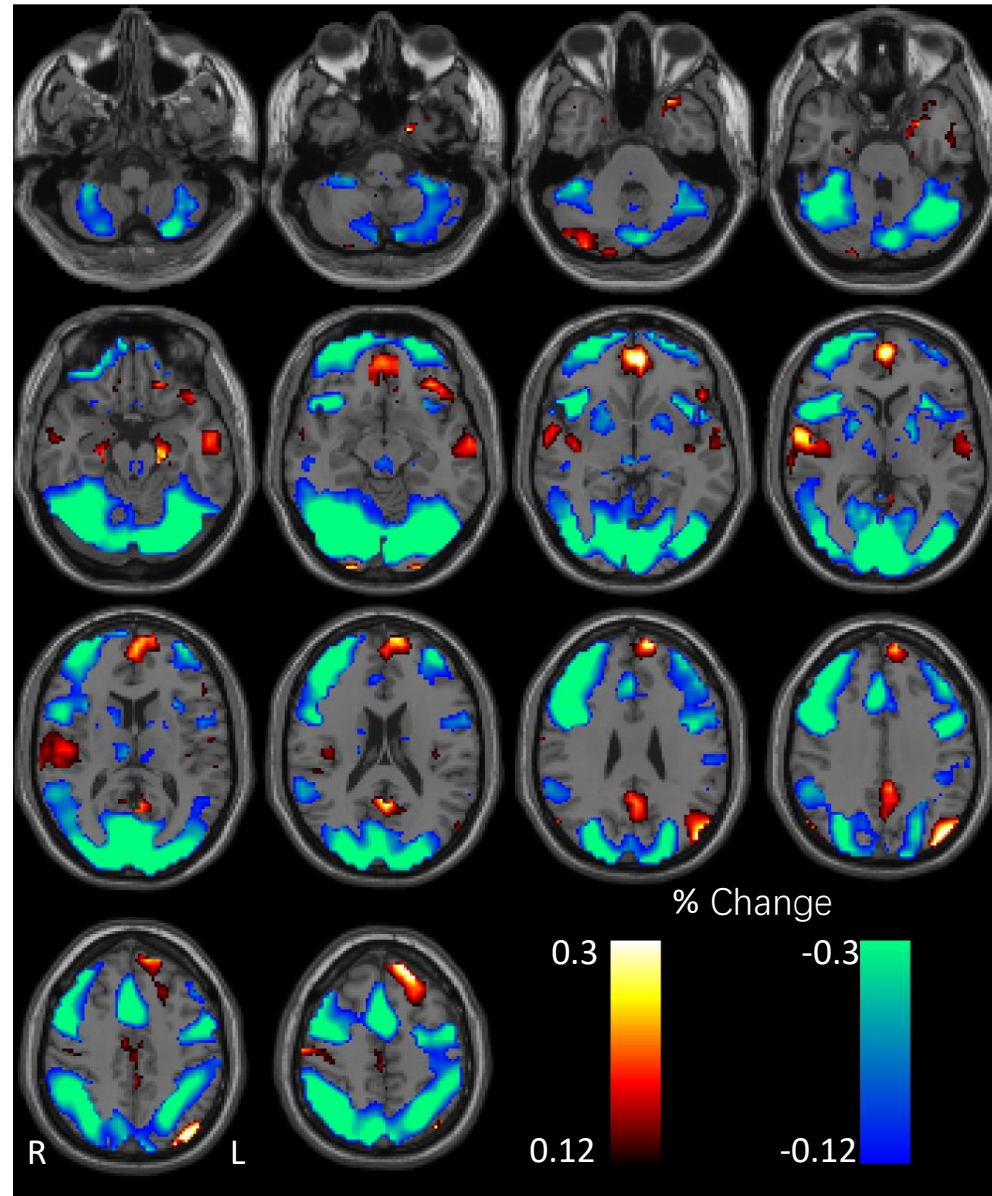

Rong Li et al.,  
2021 *Neuroimage*
